# Supplementary material for: A novel lncRNA ARST represses glioma progression by inhibiting ALDOA-mediated actin cytoskeleton integrity
Source: PubMed Central journal article supplement (PMC8183030; doi:10.1186/s13046-021-01977-9), 2021-06-07

# Supplementary Figure 5

A

| #  | Protein region | RNA region | Interaction Propensity | Discriminative Power | Normalized Score |
|----|----------------|------------|------------------------|----------------------|------------------|
| 1  | 289-340        | 1276-1361  | 6.08                   | 22                   | 2.78             |
| 2  | 289-340        | 337-422    | 5.08                   | 22                   | 2.59             |
| 3  | 289-340        | 715-800    | 3.33                   | 20                   | 2.26             |
| 4  | 26-77          | 337-422    | 2.95                   | 17                   | 2.19             |
| 5  | 226-277        | 337-422    | 2.95                   | 17                   | 2.19             |
| 6  | 251-302        | 337-422    | 2.79                   | 17                   | 2.16             |
| 7  | 289-340        | 631-716    | 2.44                   | 17                   | 2.09             |
| 8  | 289-340        | 169-254    | 2.25                   | 17                   | 2.06             |
| 9  | 189-240        | 337-422    | 2.14                   | 17                   | 2.04             |
| 10 | 289-340        | 1948-2033  | 2.07                   | 17                   | 2.02             |
| 11 | 226-277        | 631-716    | 2.07                   | 17                   | 2.02             |
| 12 | 176-227        | 631-716    | 2.05                   | 17                   | 2.02             |
| 13 | 26-77          | 1276-1361  | 1.96                   | 17                   | 2.00             |
| 14 | 189-240        | 631-716    | 1.96                   | 17                   | 2.00             |
| 15 | 26-77          | 631-716    | 1.88                   | 17                   | 1.99             |
| 16 | 251-302        | 631-716    | 1.84                   | 17                   | 1.98             |
| 17 | 289-340        | 1696-1781  | 1.81                   | 17                   | 1.98             |
| 18 | 289-340        | 1681-1766  | 1.80                   | 17                   | 1.97             |
| 19 | 289-340        | 1360-1445  | 1.76                   | 17                   | 1.97             |
| 20 | 126-177        | 631-716    | 1.74                   | 17                   | 1.96             |

B

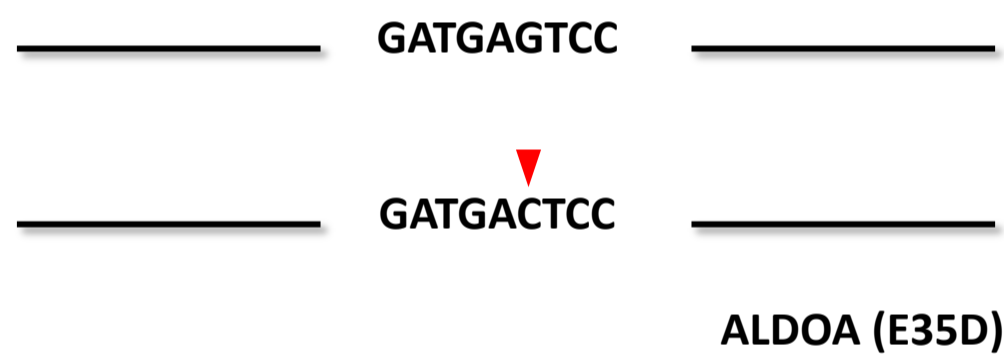

C

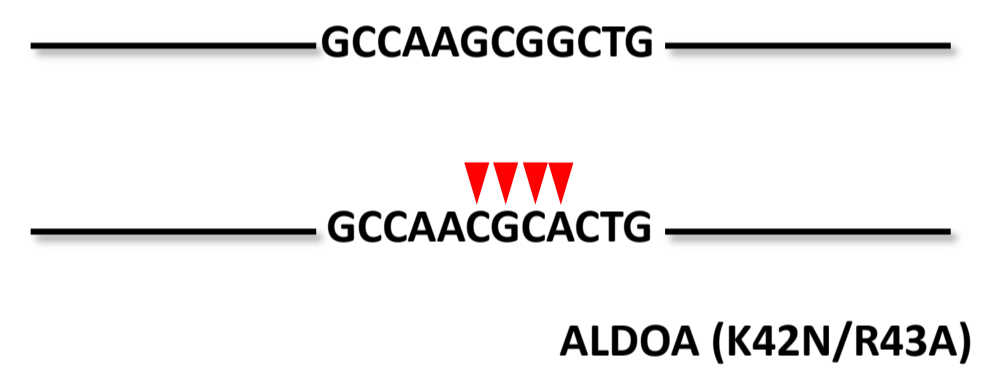

D

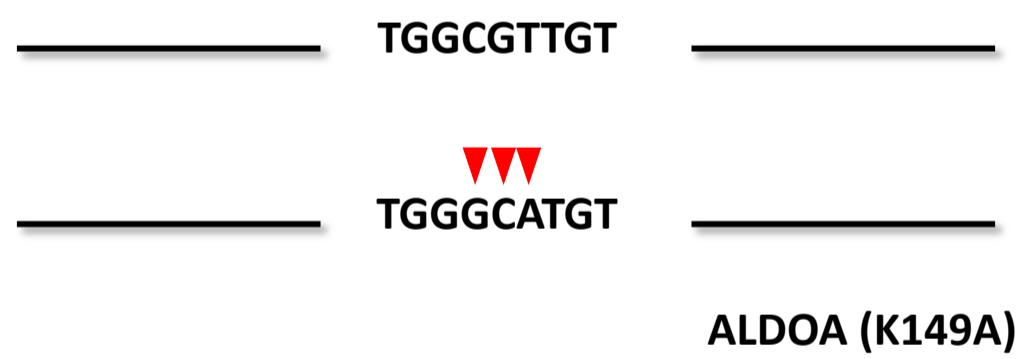

E

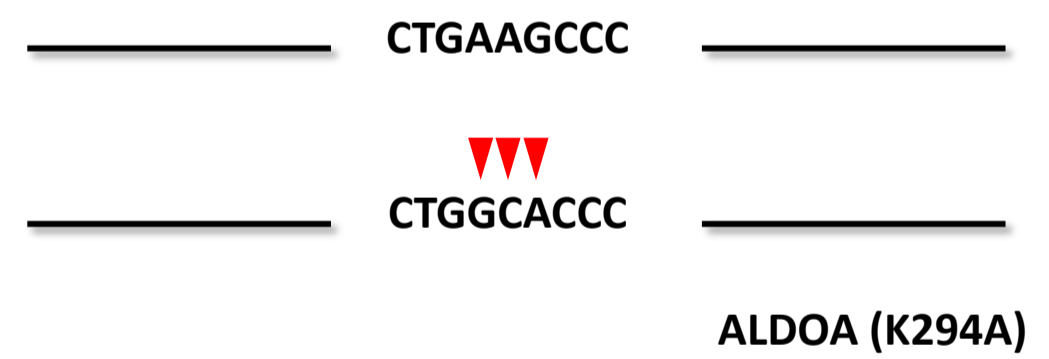

Supplement: 13046_2021_1977_MOESM5_ESM.pdf [file 13046_2021_1977_MOESM5_ESM.pdf]
