# Supplementary material for: A novel lncRNA ARST represses glioma progression by inhibiting ALDOA-mediated actin cytoskeleton integrity
Source: PubMed Central journal article supplement (PMC8183030; doi:10.1186/s13046-021-01977-9), 2021-06-07

# Supplementary Figure 3

**A**

Input ARST Anti

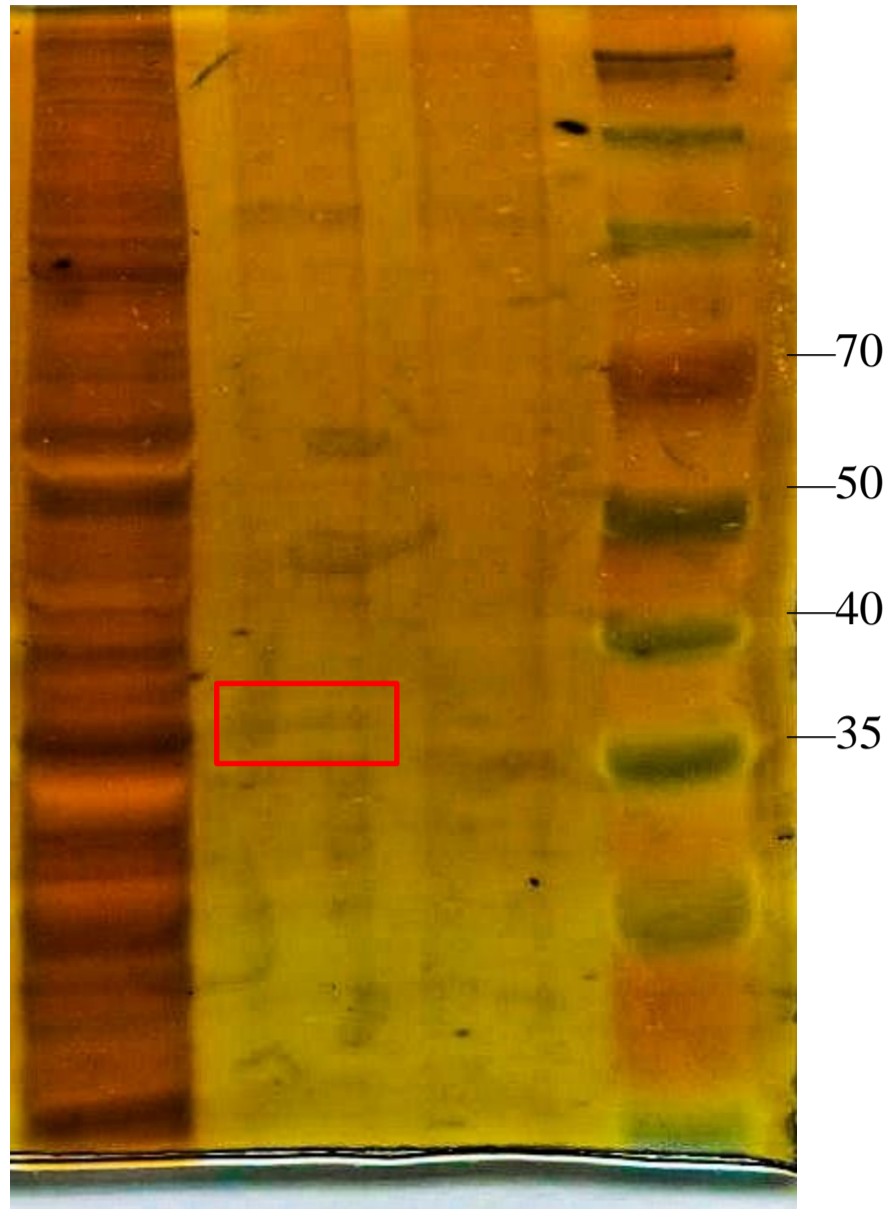

**B**

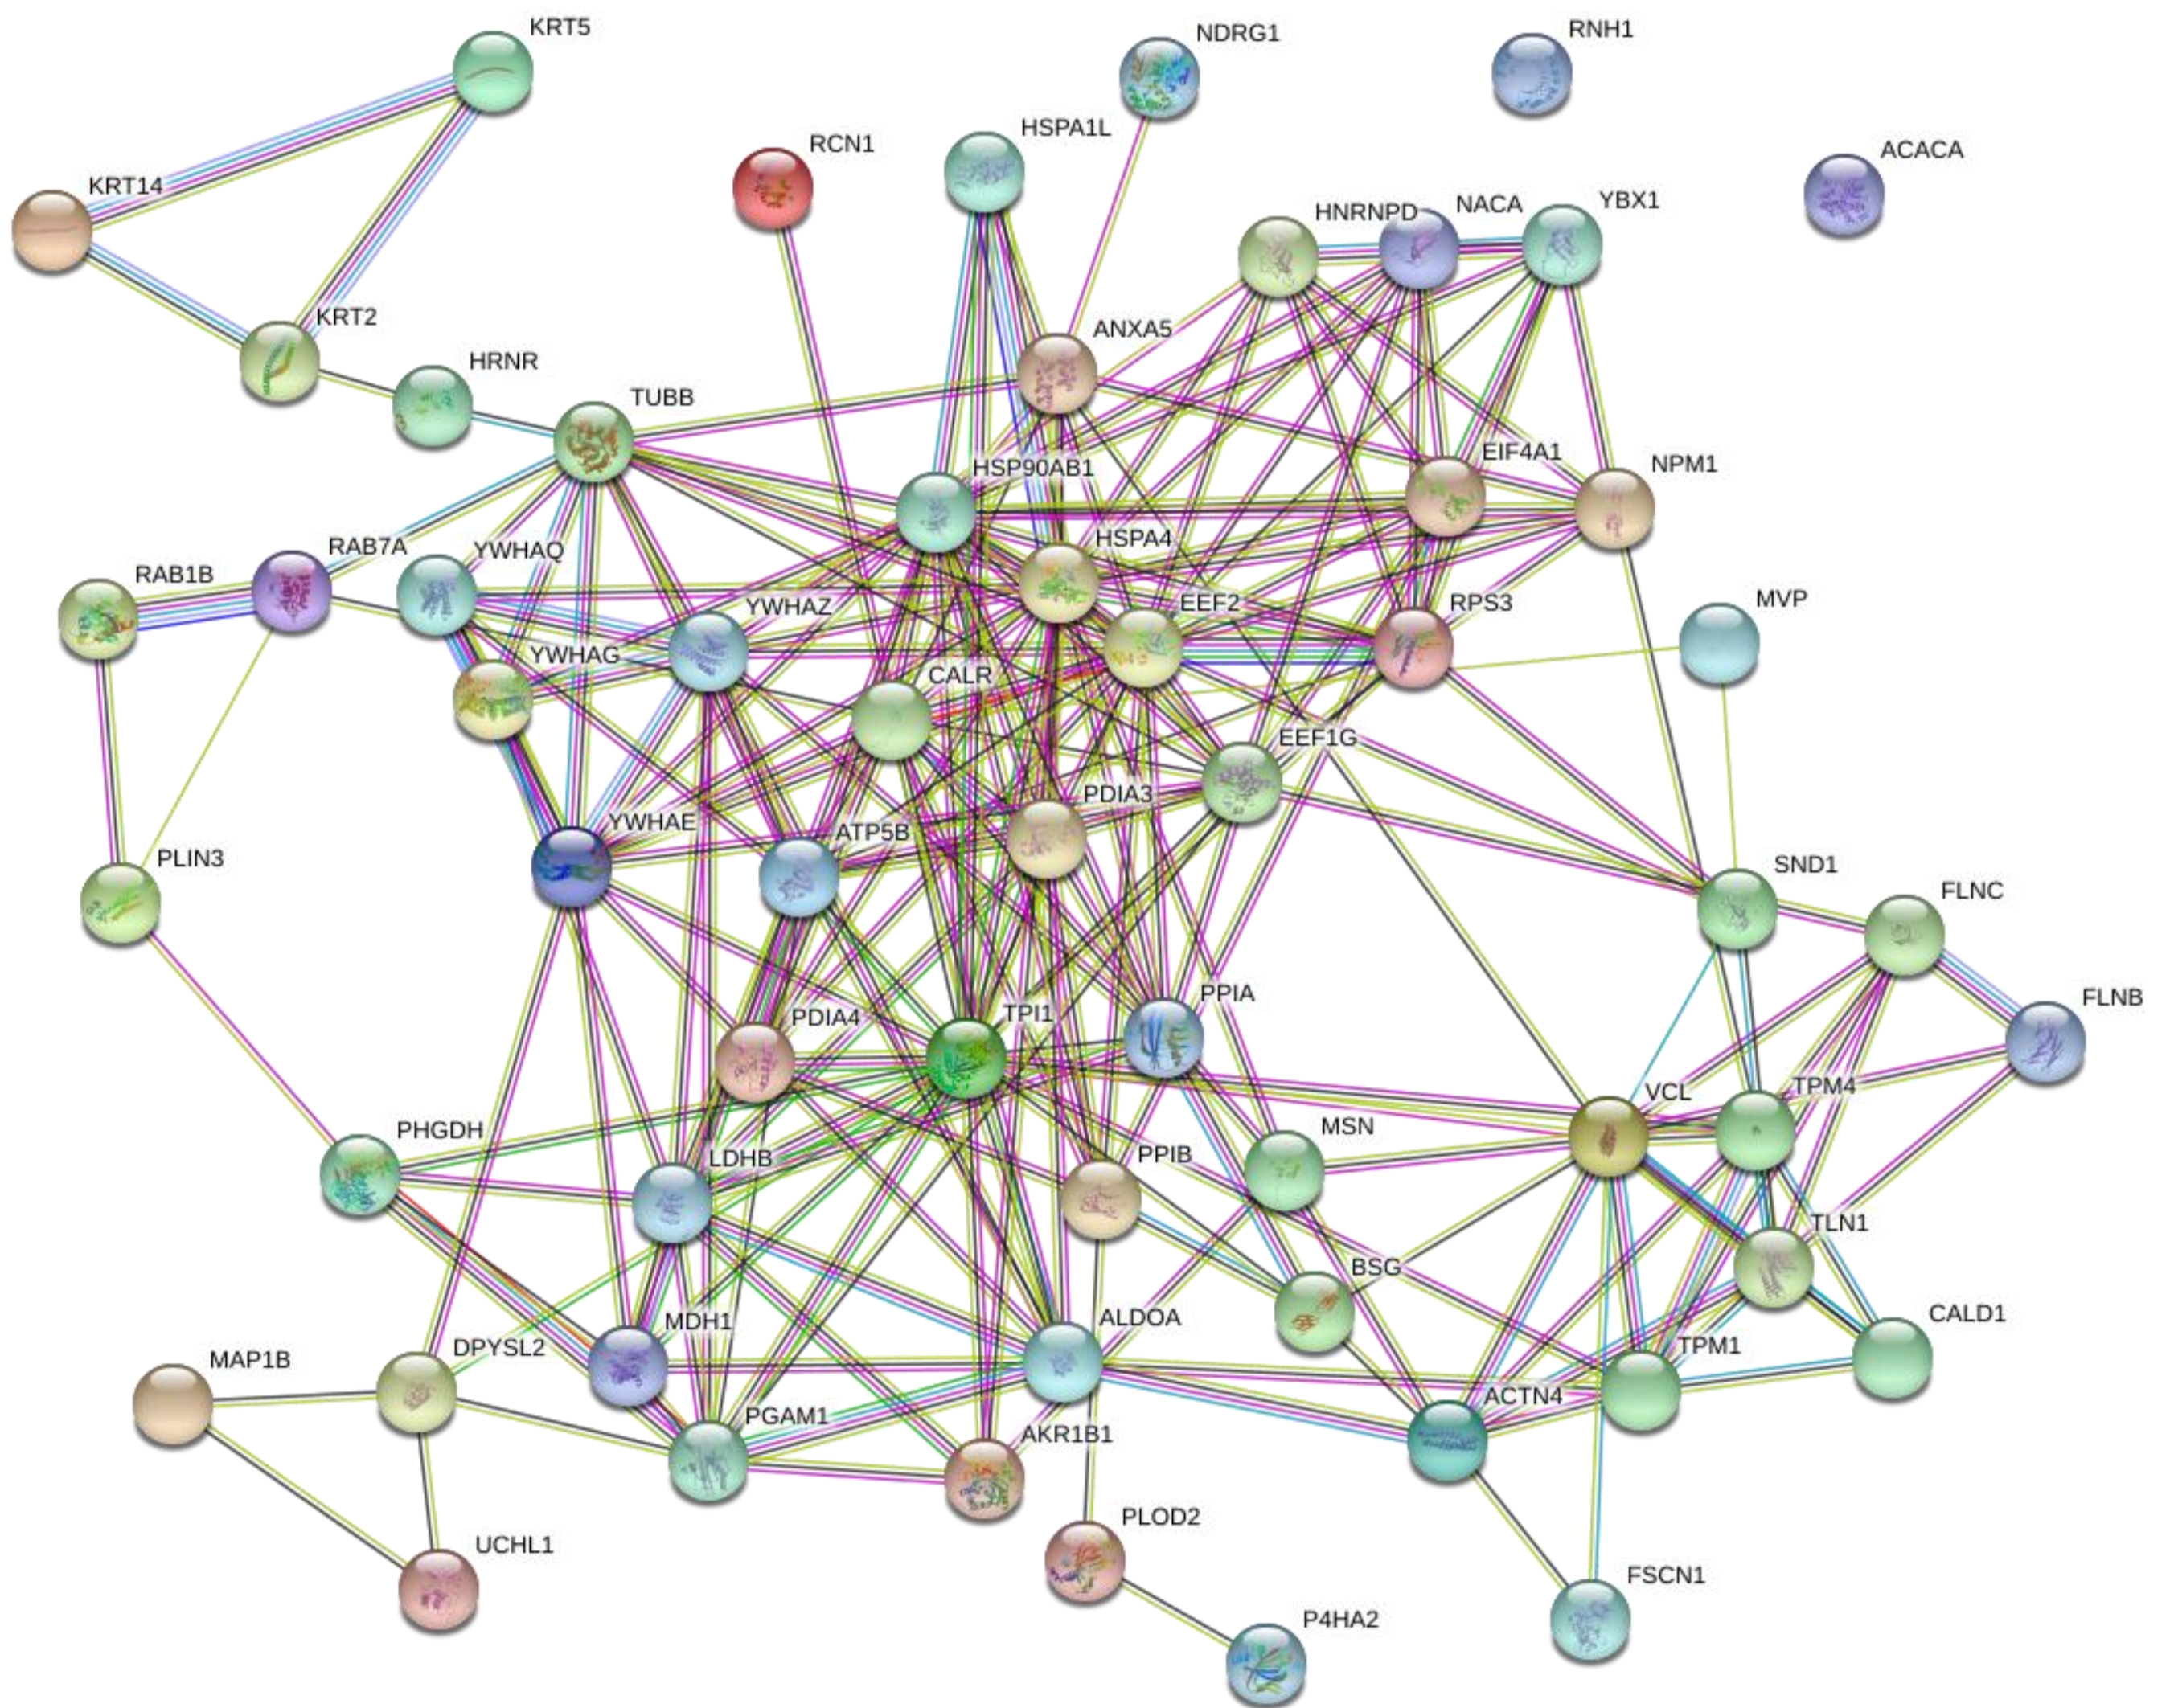

Supplement: 13046_2021_1977_MOESM3_ESM.pdf [file 13046_2021_1977_MOESM3_ESM.pdf]
