# Supplementary material for: A novel lncRNA ARST represses glioma progression by inhibiting ALDOA-mediated actin cytoskeleton integrity
Source: PubMed Central journal article supplement (PMC8183030; doi:10.1186/s13046-021-01977-9), 2021-06-07
Supplement: 13046_2021_1977_MOESM8_ESM.pdf [file 13046_2021_1977_MOESM8_ESM.pdf]

# Supplementary Figure 8

A

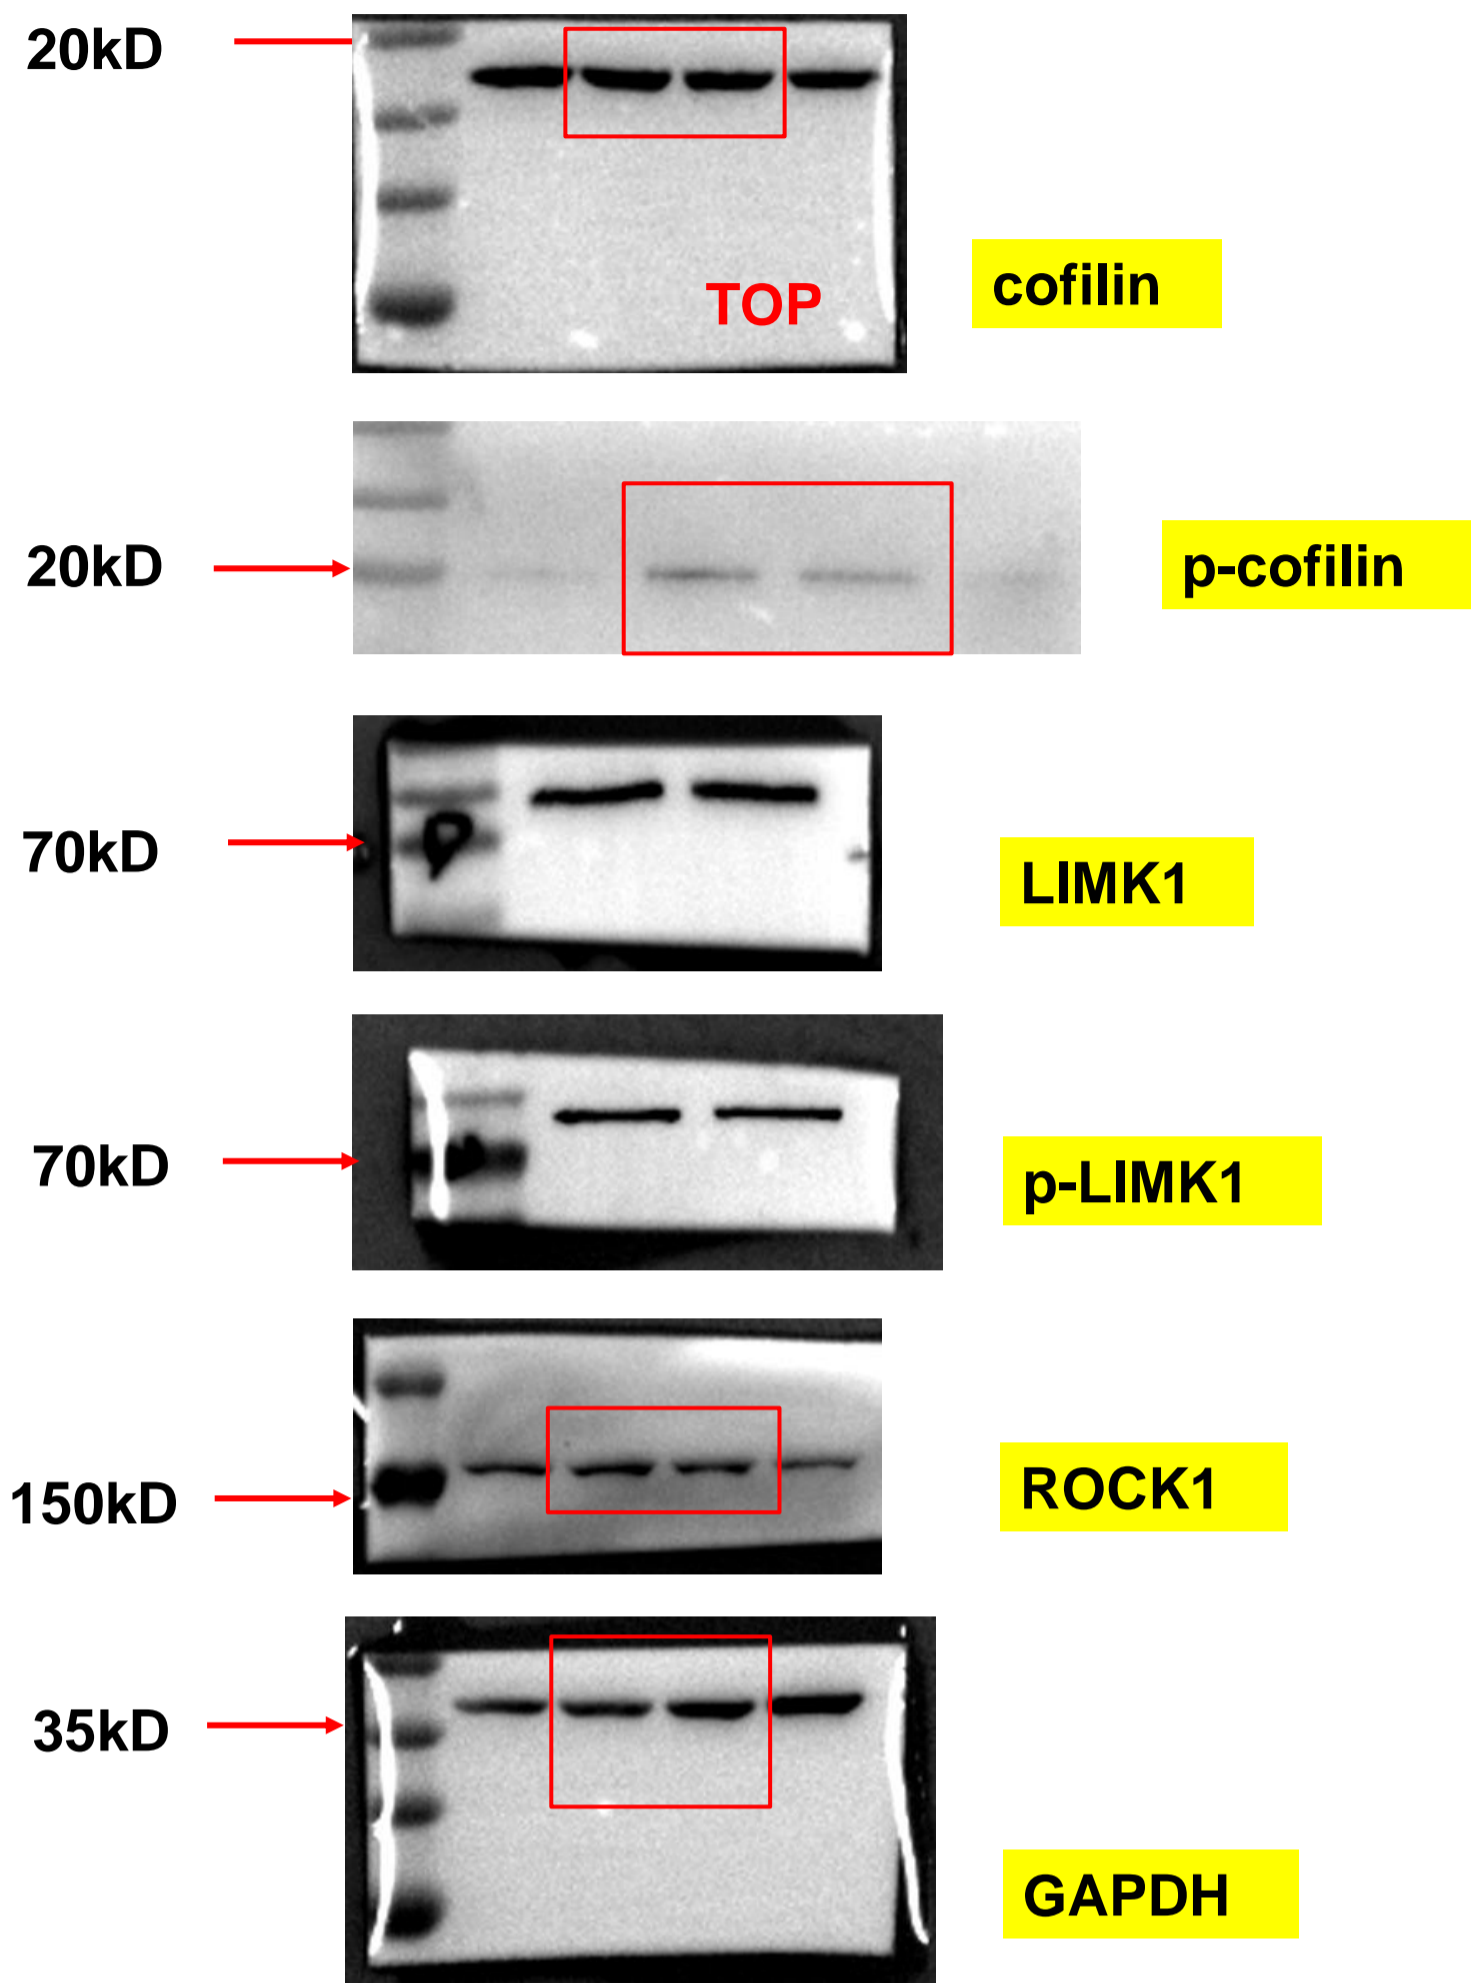

For four lanes membrane: 1<sup>st</sup> and 2<sup>nd</sup> lanes-repeated control cell lysate  
3<sup>rd</sup> and 4<sup>th</sup> lanes- repeated overexpression cell lysate
