# Supplementary material for: A novel lncRNA ARST represses glioma progression by inhibiting ALDOA-mediated actin cytoskeleton integrity
Source: J Exp Clin Cancer Res. 2021 Jun 7;40:187. doi: 10.1186/s13046-021-01977-9 (PMC8183030; doi:10.1186/s13046-021-01977-9)
Supplement: Supplementary file 9 — Additional file 9: Table S1. Peptide segments expressed by ARST theoretically and comparision in the swiss-prot database. [file 13046_2021_1977_MOESM9_ESM.xlsx]

## Sheet: Sheet1
Query:ID	Segment
>lcl|ORF1:31:111 unnamed protein product	MHGLVPVYFPSFVCQCSLSCNTCDSS
>lcl|ORF3:517:633 unnamed protein product	MILLFTIRLQFSLLVLYVRTSSLVLCLFSYVNASLECT
>lcl|ORF4:730:771 unnamed protein product	MQHSHPHSFTYCL
>lcl|ORF5:976:1020 unnamed protein product	MKIASNPFKLFAFS
>lcl|ORF6:1054:1128 unnamed protein product	MLFPCVLLFSRRDEIVLKTVRVVS
>lcl|ORF7:1480:1719 unnamed protein product	MVLILQCLLYTGLLEAMYFIVFKSRFFNVFQHLHHSVFTFLNVSYFLVLQCIFIANSSNAQVFKYLQELSGTSISSMSE
>lcl|ORF8:1825:1962 unnamed protein product	MSISMLTNVSQYPGLLILGFINVYICCCLYLPVFRSSKVQDLQYL
>lcl|ORF9:1984:2046 unnamed protein product	MTSNIQYPNVQGLQKYQCPE
>lcl|ORF10:2050:2115 unnamed protein product, partial	MSSKSKACNVSNILCLQCFQCP
>lcl|ORF11:611:661 unnamed protein product	MLAWNVLNFTISLIWR
>lcl|ORF12:782:847 unnamed protein product	MGELSSCNRDNVTCKALNIYF
>lcl|ORF13:1349:1465 unnamed protein product	MPLFSKLPSIQVIKNLGLLISPTTHLQSPGLVFQNPEF
>lcl|ORF14:1562:1603 unnamed protein product	MSSSTYIIQFLHF
>lcl|ORF15:1655:1723 unnamed protein product	MPKSLNTCKNFQVHQYPQCLNE
>lcl|ORF16:1847:1879 unnamed protein product	MSPNIQGFSF
>lcl|ORF17:1889:1987 unnamed protein product	MSTSAVVYICQYLGVPRYRTYNISNFQRFQCL
>lcl|ORF18:2009:2116 unnamed protein product, partial	MFRASRNINVQSNQCLQNPRLAMSPISCAYNVSNVQ
>lcl|ORF19:1125:1157 unnamed protein product	MMSFNLISRP
>lcl|ORF20:1497:1547 unnamed protein product	MSPIYRSSRGYVFHSV
>lcl|ORF21:1716:1772 unnamed protein product	MNRPLNILVSYCPGCQYS
>lcl|ORF22:2034:2114 unnamed protein product, partial	MSRVTNVFKIQGLQCLQYPVLTMFPMS
