# Supplementary material for: A novel lncRNA ARST represses glioma progression by inhibiting ALDOA-mediated actin cytoskeleton integrity
Source: J Exp Clin Cancer Res. 2021 Jun 7;40:187. doi: 10.1186/s13046-021-01977-9 (PMC8183030; doi:10.1186/s13046-021-01977-9)
Supplement: Supplementary file 10 — Additional file 10: Table S2. Proteins binding to ARST sense strands and anti-sense strands. [file 13046_2021_1977_MOESM10_ESM.xlsx]

## Sheet: sense
Accession	Description	Score	Coverage	# Proteins	# Unique Peptides	# Peptides	# PSMs	# AAs	MW [kDa]	calc. pI
P60709	Actin, cytoplasmic 1 OS=Homo sapiens GN=ACTB PE=1 SV=1 - [ACTB_HUMAN]	150.029	45.07	2	18	18	63	375	41.7097	5.47803
	A2	Sequence	# PSMs	# Proteins	# Protein Groups	Protein Group Accessions	Modifications	ΔCn	q-Value	PEP	XCorr	Charge	MH+ [Da]	ΔM [ppm]	RT [min]	# Missed Cleavages
	High	SYELPDGQVITIGNER	6	2	1	P60709		0	0	1.845e-10	3.87131	2	1790.89	1.44484	123.218	0
	High	IWHHTFYNELR	4	2	1	P60709		0	0	3.712e-05	3.47868	3	1515.75	-0.933828	101.986	0
	High	QEYDESGPSIVHR	4	2	1	P60709		0	0	2.404e-06	3.25819	3	1516.7	0.516611	61.2111	0
	High	DSYVGDEAQSK	4	2	1	P60709		0	0	2.621e-06	3.15101	2	1198.52	0.189597	42.1897	0
	High	DSYVGDEAQSKR	5	2	1	P60709		0	0	1.049e-05	3.09809	2	1354.62	-0.0462753	41.4562	1
	High	AGFAGDDAPR	4	2	1	P60709		0	0	0.0001121	3.08246	2	976.448	-0.250519	51.3565	0
	High	GYSFTTTAER	4	2	1	P60709		0	0	2.001e-05	3.0699	2	1132.53	0.0563676	74.5511	0
	High	VAPEEHPVLLTEAPLNPK	8	2	1	P60709		0	0	0.0004444	3.06667	3	1954.06	-0.257056	98.9902	0
	High	KDLYANTVLSGGTTmYPGIADR	2	2	1	P60709	M15(Oxidation)	0	0	0.003026	2.82084	3	2359.16	0.00422257	104.718	1
	High	HQGVMVGMGQK	6	2	1	P60709		0	0	0.0002194	2.80344	2	1171.57	-0.866651	53.2017	0
	High	MQKEITALAPSTMK	2	2	1	P60709		0	0	0.0008229	2.71007	2	1548.82	2.86724	79.538	1
	High	HQGVmVGMGQK	3	2	1	P60709	M5(Oxidation)	0	0	0.0001308	2.54963	3	1187.57	1.12848	41.0239	0
	High	EITALAPSTMK	2	2	1	P60709		0	0	0.0003107	1.83934	2	1161.62	-0.206297	79.8428	0
	High	DLTDYLMK	3	2	1	P60709		0	0.001	0.006113	2.10665	2	998.487	0.452354	118.062	0
	High	IIAPPERK	1	2	1	P60709		0	0.001	0.007379	1.60597	2	923.567	-0.223118	39.2399	1
	High	DLYANTVLSGGTTmYPGIADR	1	2	1	P60709	M14(Oxidation)	0	0.002	0.01022	1.62757	3	2231.06	-4.40034	117.572	0
	High	GYSFTTTAEREIVR	1	2	1	P60709		0	0.003	0.01406	2.29563	3	1629.82	-0.0853472	98.8836	1
	High	QEYDESGPSIVHRK	1	2	1	P60709		0	0.003	0.01207	2.06424	3	1644.8	-0.506557	54.0732	1
	High	EITALAPSTmK	1	2	1	P60709	M10(Oxidation)	0	0.008	0.03109	1.97737	2	1177.61	-1.89767	79.8525	0
	High	AVFPSIVGRPR	1	2	1	P60709		0	0.009	0.03666	2.12878	2	1198.71	-0.371715	91.1148	0
P08670	Vimentin OS=Homo sapiens GN=VIM PE=1 SV=4 - [VIME_HUMAN]	135.75	58.37	1	28	28	61	466	53.6191	5.12256
	A2	Sequence	# PSMs	# Proteins	# Protein Groups	Protein Group Accessions	Modifications	ΔCn	q-Value	PEP	XCorr	Charge	MH+ [Da]	ΔM [ppm]	RT [min]	# Missed Cleavages
	High	TNEKVELQELNDR	4	1	1	P08670		0	0	3.554e-06	3.86732	3	1587.8	-0.323204	73.0676	1
	High	VEVERDNLAEDIMR	6	1	1	P08670		0	0	8.366e-08	3.65007	3	1688.83	0.10449	101.437	1
	High	ILLAELEQLKGQGK	3	1	1	P08670		0	0	1.638e-05	3.50064	2	1539.91	2.86593	114.01	1
	High	FADLSEAANR	4	1	1	P08670		0	0	0.001635	3.16742	2	1093.53	-0.605722	69.5908	0
	High	LQEEMLQREEAENTLQSFR	2	1	1	P08670		0	0	1.622e-06	3.09948	3	2351.13	0.139395	111.166	1
	High	TVETRDGQVINETSQHHDDLE	1	1	1	P08670		0	0	8.078e-06	3.09904	3	2423.11	1.8588	72.8485	1
	High	LQDEIQNMKEEMAR	3	1	1	P08670		0	0	0.0004549	2.7064	2	1734.82	2.15693	92.4434	1
	High	SRLGDLYEEEMR	2	1	1	P08670		0	0	0.0001412	2.57761	2	1497.7	1.19027	99.8835	1
	High	NLQEAEEWYK	1	1	1	P08670		0	0	0.002115	2.54934	2	1309.61	-0.518547	101.114	0
	High	LLQDSVDFSLADAINTEFK	1	1	1	P08670		0	0	0.002683	2.31177	2	2126.07	2.84344	140.985	0
	High	QVQSLTcEVDALKGTNESLER	3	1	1	P08670	C7(Carbamidomethyl)	0	0	6.524e-06	2.21388	3	2377.16	-1.05618	107.968	1
	High	LGDLYEEEMR	2	1	1	P08670		0	0	0.0007029	2.05878	2	1254.57	0.425048	91.8264	0
	High	SLYASSPGGVYATR	1	1	1	P08670		0	0	8.664e-06	2.05646	2	1428.71	1.98494	79.7162	0
	High	EEAENTLQSFR	2	1	1	P08670		0	0	0.001388	1.97143	2	1323.62	-0.453562	82.614	0
	High	LLEGEESR	2	1	1	P08670		0	0	0.001452	1.90462	2	932.468	-0.229555	42.3657	0
	High	DGQVINETSQHHDDLE	3	1	1	P08670		0	0	0.0001158	1.88285	2	1836.8	1.03326	60.2458	0
	High	RQVDQLTNDK	2	1	1	P08670		0	0.001	0.006706	2.93834	2	1216.63	0.407962	36.4371	1
	High	KVESLQEEIAFLK	3	1	1	P08670		0	0.001	0.003433	2.78108	3	1533.85	-2.16979	124.688	1
	High	FANYIDKVR	1	1	1	P08670		0	0.001	0.004611	2.63136	2	1125.6	-0.335263	77.4289	1
	High	VELQELNDR	2	1	1	P08670		0	0.001	0.004091	2.26823	2	1115.57	0.83783	74.1425	0
	High	VEVERDNLAEDImR	2	1	1	P08670	M13(Oxidation)	0	0.002	0.008527	2.65498	3	1704.82	0.0430997	80.2054	1
	High	FADLSEAANRNNDALR	1	1	1	P08670		0	0.002	0.008539	2.34086	3	1776.86	-1.46601	79.6186	1
	High	ETNLDSLPLVDTHSKR	2	1	1	P08670		0	0.002	0.009496	1.40428	3	1824.94	-0.76309	90.7713	1
	High	EKLQEEMLQR	2	1	1	P08670		0	0.003	0.01238	2.1968	2	1303.67	-0.0961156	69.7114	1
	High	QDVDNASLAR	1	1	1	P08670		0	0.003	0.01463	2.03603	2	1088.54	2.80111	44.0845	0
	High	SYVTTSTR	1	1	1	P08670		0	0.005	0.01818	1.71206	2	914.457	-0.389565	39.9772	0
	High	EYQDLLNVK	2	1	1	P08670		0	0.007	0.02647	2.27025	2	1121.58	0.467922	95.9809	0
	High	ILLAELEQLK	1	1	1	P08670		0	0.007	0.02592	1.96323	2	1169.71	-0.855771	131.561	0
	High	QVDQLTNDK	1	1	1	P08670		0	0.008	0.03213	1.79183	2	1060.53	0.626282	38.7447	0
P04264	Keratin, type II cytoskeletal 1 OS=Homo sapiens GN=KRT1 PE=1 SV=6 - [K2C1_HUMAN]	134.579	40.53	1	18	21	53	644	65.999	8.11865
	A2	Sequence	# PSMs	# Proteins	# Protein Groups	Protein Group Accessions	Modifications	ΔCn	q-Value	PEP	XCorr	Charge	MH+ [Da]	ΔM [ppm]	RT [min]	# Missed Cleavages
	High	FLEQQNQVLQTK	4	2	2	P35908;P04264		0	0	8.25e-06	3.76595	2	1475.79	0.830284	79.123	0
	High	WELLQQVDTSTR	2	1	1	P04264		0	0	1.035e-06	3.52952	2	1475.75	3.06573	117.741	0
	High	GGGGGGYGSGGSSYGSGGGSYGSGGGGGGGR	4	1	1	P04264		0	0	1.628e-05	3.34439	2	2383.96	2.85933	54.7656	0
	High	SLNNQFASFIDK	2	1	1	P04264		0	0	2.877e-06	3.30852	2	1383.69	-0.35728	121.927	0
	High	YEELQITAGR	6	1	1	P04264		0	0	2.645e-05	3.23586	2	1179.6	-0.276403	83.7488	0
	High	GSYGSGGSSYGSGGGSYGSGGGGGGHGSYGSGSSSGGYR	1	1	1	P04264		0	0	5.411e-06	3.02985	3	3312.31	1.13321	66.6659	0
	High	TNAENEFVTIKK	5	1	1	P04264		0	0	0.0003196	3.00917	2	1393.73	0.083304	72.5956	1
	High	NKYEDEINKR	2	2	2	P04264;P13647		0	0	0.002241	2.93783	3	1308.65	-0.0705633	53.671	2
	High	GSGGGSSGGSIGGR	3	1	1	P04264		0	0	0.002819	2.91209	2	1092.5	-0.498274	22.7471	0
	High	SKAEAESLYQSK	4	1	1	P04264		0	0	0.0003293	2.74737	3	1340.67	0.00249176	49.0817	1
	High	LLRDYQELMNTK	3	1	1	P04264		0	0	0.0008382	2.55794	3	1523.79	0.51981	97.5819	1
	High	SGGGFSSGSAGIINYQR	2	1	1	P04264		0	0	0.001741	2.47456	2	1657.79	0.0452703	91.1436	0
	High	AEAESLYQSK	2	1	1	P04264		0	0	0.0008384	2.46797	2	1125.54	0.219243	54.3135	0
	High	NMQDmVEDYR	2	1	1	P04264	M5(Oxidation)	0	0	0.0004167	2.41609	2	1316.52	0.0603877	77.3597	0
	High	QISNLQQSISDAEQR	2	1	1	P04264		0	0	4.264e-06	2.24898	2	1716.85	1.38738	95.8609	0
	High	GGSGGGGGGSSGGR	1	1	1	P04264		0	0	0.002152	1.93065	2	1006.43	-0.319324	10.3975	0
	High	NSKIEISELNR	1	1	1	P04264		0	0.002	0.008803	2.83571	3	1302.7	-1.47144	72.1265	1
	High	IEISELNR	1	2	2	P35908;P04264		0	0.003	0.01388	2.64862	2	973.531	-0.0346175	79.3435	0
	High	DYQELMNTK	2	1	1	P04264		0	0.003	0.01385	2.2792	2	1141.52	-2.12518	81.7731	0
	High	AQYEDIAQK	2	1	1	P04264		0	0.004	0.01513	2.381	2	1065.52	0.357265	52.9805	0
	High	TLLEGEESR	2	1	1	P04264		0	0.005	0.01979	1.80174	2	1033.52	-0.395448	59.9422	0
P14618	Pyruvate kinase PKM OS=Homo sapiens GN=PKM PE=1 SV=4 - [KPYM_HUMAN]	125.781	37.48	1	22	22	50	531	57.9	7.84033
	A2	Sequence	# PSMs	# Proteins	# Protein Groups	Protein Group Accessions	Modifications	ΔCn	q-Value	PEP	XCorr	Charge	MH+ [Da]	ΔM [ppm]	RT [min]	# Missed Cleavages
	High	GADFLVTEVENGGSLGSK	2	1	1	P14618		0	0	4.912e-10	4.70213	2	1779.88	1.29908	123.53	0
	High	GVNLPGAAVDLPAVSEK	2	1	1	P14618		0	0	2.314e-05	3.55359	2	1636.89	1.70863	110.496	0
	High	QKGADFLVTEVENGGSLGSK	3	1	1	P14618		0	0	0.001269	3.49218	3	2036.02	-2.37124	112.528	1
	High	NTGIIcTIGPASR	2	1	1	P14618	C6(Carbamidomethyl)	0	0	0.0006286	3.32201	2	1359.7	-3.48046	85.4286	0
	High	DPVQEAWAEDVDLR	2	1	1	P14618		0	0	1.48e-07	3.25469	2	1642.77	1.54113	123.228	0
	High	LDIDSPPITAR	4	1	1	P14618		0	0	2.442e-07	2.9907	2	1197.65	0.361915	87.5756	0
	High	GDYPLEAVR	2	1	1	P14618		0	0	0.001176	2.85364	2	1019.52	-0.307869	84.0821	0
	High	GDLGIEIPAEK	4	1	1	P14618		0	0	8.006e-05	2.8414	2	1141.61	-1.25542	96.1935	0
	High	GSGTAEVELK	4	1	1	P14618		0	0	0.003041	2.77364	2	990.51	-0.154365	50.0052	0
	High	KASDVHEVR	2	1	1	P14618		0	0	0.0006507	2.55628	2	1040.55	-0.11141	22.3147	1
	High	cDENILWLDYK	2	1	1	P14618	C1(Carbamidomethyl)	0	0	0.0001092	2.30177	2	1468.68	0.523665	131.452	0
	High	APIIAVTR	3	1	1	P14618		0	0	0.002757	2.27373	2	840.531	1.00194	68.7241	0
	High	IENHEGVR	3	1	1	P14618		0	0.001	0.005729	2.38347	2	953.479	-0.698132	22.527	0
	High	MQHLIAR	3	1	1	P14618		0	0.002	0.01024	2.14758	2	868.482	-0.124398	45.198	0
	High	KGVNLPGAAVDLPAVSEK	2	1	1	P14618		0	0.002	0.009016	2.01956	2	1764.99	2.06916	100.704	1
	High	GSGTAEVELKK	2	1	1	P14618		0	0.003	0.01362	2.02688	2	1118.61	-0.190624	42.1626	1
	High	TATESFASDPILYRPVAVALDTK	1	1	1	P14618		0	0.004	0.01527	1.82465	3	2465.29	0.268367	132.916	0
	High	SGMNVAR	2	1	1	P14618		0	0.005	0.01971	2.26821	2	734.362	0.17366	30.4485	0
	High	VNFAMNVGK	2	1	1	P14618		0	0.005	0.018	1.98609	2	979.501	-1.78968	85.8474	0
	High	ASDVHEVR	1	1	1	P14618		0	0.005	0.0225	1.42603	2	912.454	0.541091	18.9611	0
	High	SVETLKEMIK	1	1	1	P14618		0	0.008	0.02939	2.46577	2	1177.65	0.479644	90.6363	1
	High	GADFLVTEVENGGSLGSKK	1	1	1	P14618		0	0.008	0.0289	2.31835	3	1907.97	-1.6099	115.18	1
P11021	78 kDa glucose-regulated protein OS=Homo sapiens GN=HSPA5 PE=1 SV=2 - [GRP78_HUMAN]	116.473	43.73	1	24	26	52	654	72.2884	5.16064
	A2	Sequence	# PSMs	# Proteins	# Protein Groups	Protein Group Accessions	Modifications	ΔCn	q-Value	PEP	XCorr	Charge	MH+ [Da]	ΔM [ppm]	RT [min]	# Missed Cleavages
	High	VTHAVVTVPAYFNDAQR	5	1	1	P11021		0	0	1.646e-07	4.24113	3	1887.97	-2.36832	100.01	0
	High	DAGTIAGLNVMR	2	1	1	P11021		0	0	4.145e-08	3.38706	2	1217.63	0.620898	102.407	0
	High	SDIDEIVLVGGSTR	1	1	1	P11021		0	0	0.0002979	3.37749	2	1460.77	5.52327	111.606	0
	High	IDTRNELESYAYSLK	2	1	1	P11021		0	0	0.0017	3.35461	3	1801.9	-0.281897	112.371	1
	High	IINEPTAAAIAYGLDKR	2	1	1	P11021		0	0	1.472e-06	3.10588	2	1816	1.33017	112.594	1
	High	NELESYAYSLK	2	1	1	P11021		0	0	0.002756	2.963	2	1316.64	-1.30778	107.704	0
	High	LYGSAGPPPTGEEDTAEKDEL	2	1	1	P11021		0	0	0.001347	2.9228	2	2175.99	-0.651943	88.0674	1
	High	SQIFSTASDNQPTVTIK	4	1	1	P11021		0	0	3.805e-06	2.88701	2	1836.94	2.01221	92.8427	0
	High	TFAPEEISAMVLTK	1	1	1	P11021		0	0	7.277e-07	2.87229	2	1536.8	1.27602	134.638	0
	High	ELEEIVQPIISK	2	1	1	P11021		0	0	0.0005213	2.8413	2	1397.79	0.823601	109.506	0
	High	NQLTSNPENTVFDAK	2	1	1	P11021		0	0	3.992e-05	2.77182	2	1677.81	0.501916	89.7348	0
	High	VEIIANDQGNR	4	3	3	P11021;P34931;P11142		0	0	8.743e-05	2.60628	2	1228.63	1.19068	55.1643	0
	High	ITPSYVAFTPEGER	6	1	1	P11021		0	0	4.445e-05	2.60559	2	1566.78	1.43019	103.136	0
	High	TWNDPSVQQDIK	3	1	1	P11021		0	0	1.057e-05	2.45649	2	1430.69	-0.599818	82.6108	0
	High	IINEPTAAAIAYGLDK	1	3	3	P11021;P34931;P11142		0	0	9.368e-05	2.43602	2	1659.89	-4.40045	119.975	0
	High	KVTHAVVTVPAYFNDAQR	1	1	1	P11021		0	0	0.002413	2.28438	3	2016.07	0.567754	98.7998	1
	High	ALSSQHQAR	1	1	1	P11021		0	0	5.305e-05	1.31261	2	997.518	0.163795	14.3631	0
	High	KKELEEIVQPIISK	1	1	1	P11021		0	0.002	0.009014	2.77899	3	1653.98	-0.97184	99.323	2
	High	VTAEDKGTGNK	1	1	1	P11021		0	0.002	0.0109	2.03172	2	1119.56	-0.406469	11.6272	1
	High	ITITNDQNR	1	1	1	P11021		0	0.003	0.01192	1.86296	2	1074.55	-0.654333	43.7349	0
	High	IEWLESHQDADIEDFKAK	2	1	1	P11021		0	0.003	0.01482	1.84215	3	2174.04	-2.10884	110.355	1
	High	KSDIDEIVLVGGSTR	1	1	1	P11021		0	0.004	0.01488	2.66534	3	1588.85	-2.92025	100.02	1
	High	MVNDAEKFAEEDKK	2	1	1	P11021		0	0.005	0.01954	2.11572	3	1653.78	-0.588378	61.913	2
	High	NQIGDKEK	1	1	1	P11021		0	0.008	0.03102	2.11188	2	931.484	-0.676435	15.6452	1
	High	AKFEELNMDLFR	1	1	1	P11021		0	0.008	0.03132	1.92788	2	1512.75	0.176733	129.477	1
	High	VYEGERPLTK	1	1	1	P11021		0	0.008	0.02922	1.69133	2	1191.64	0.0227578	46.0755	0
P06733	Alpha-enolase OS=Homo sapiens GN=ENO1 PE=1 SV=2 - [ENOA_HUMAN]	87.4457	36.41	1	16	16	38	434	47.1393	7.38623
	A2	Sequence	# PSMs	# Proteins	# Protein Groups	Protein Group Accessions	Modifications	ΔCn	q-Value	PEP	XCorr	Charge	MH+ [Da]	ΔM [ppm]	RT [min]	# Missed Cleavages
	High	IGAEVYHNLK	4	1	1	P06733		0	0	0.001098	3.33981	2	1143.62	-0.170674	62.7067	0
	High	SGKYDLDFKSPDDPSR	3	1	1	P06733		0	0	9.88e-05	3.11895	3	1826.85	-0.360025	80.4647	2
	High	VNQIGSVTESLQAcK	2	1	1	P06733	C14(Carbamidomethyl)	0	0	1.757e-06	3.08376	2	1633.81	-3.96391	89.6308	0
	High	LMIEMDGTENK	2	1	1	P06733		0	0	5.898e-05	2.90253	2	1280.59	-0.0578883	86.6392	0
	High	YGKDATNVGDEGGFAPNILENK	2	1	1	P06733		0	0	1.109e-05	2.86544	3	2309.11	0.812925	102.748	1
	High	KLNVTEQEKIDK	3	1	1	P06733		0	0	8.808e-05	2.84563	3	1444.8	0.873985	54.0869	2
	High	SGKYDLDFK	2	1	1	P06733		0	0	0.0008404	2.65463	3	1072.53	-1.26346	79.0225	1
	High	GNPTVEVDLFTSK	3	1	1	P06733		0	0	0.0003281	2.3814	2	1406.71	-1.14031	112.61	0
	High	LAQANGWGVMVSHR	4	1	1	P06733		0	0	0.001685	2.25142	2	1525.77	3.60903	93.618	0
	High	YISPDQLADLYK	3	1	1	P06733		0	0	5.643e-06	1.6112	2	1425.73	0.813024	124.495	0
	High	DATNVGDEGGFAPNILENK	2	1	1	P06733		0	0.001	0.004318	2.15325	2	1960.92	-0.150554	110.524	0
	High	AAVPSGASTGIYEALELR	2	1	1	P06733		0	0.002	0.008966	1.67406	2	1804.95	1.06881	130.474	0
	High	YDLDFKSPDDPSR	2	1	1	P06733		0	0.003	0.01356	2.11636	2	1554.71	0.43093	88.3423	1
	High	IDKLMIEMDGTENK	1	1	1	P06733		0	0.004	0.01488	2.24548	3	1636.8	2.03693	93.644	1
	High	IEEELGSK	2	1	1	P06733		0	0.007	0.02577	2.24151	2	904.462	-0.657645	44.476	0
	High	AVEHINK	1	1	1	P06733		0	0.009	0.03707	1.61058	2	810.447	-0.0448611	18.3212	0
P04406	Glyceraldehyde-3-phosphate dehydrogenase OS=Homo sapiens GN=GAPDH PE=1 SV=3 - [G3P_HUMAN]	76.7529	35.82	1	11	11	32	335	36.0304	8.45557
	A2	Sequence	# PSMs	# Proteins	# Protein Groups	Protein Group Accessions	Modifications	ΔCn	q-Value	PEP	XCorr	Charge	MH+ [Da]	ΔM [ppm]	RT [min]	# Missed Cleavages
	High	VVDLMAHMASKE	7	1	1	P04406		0	0	1.985e-05	3.70553	2	1330.65	0.00778661	87.8643	1
	High	GALQNIIPASTGAAK	5	1	1	P04406		0	0	5.389e-08	3.36039	2	1411.79	0.18821	94.9499	0
	High	LEKPAKYDDIKK	2	1	1	P04406		0	0	0.0004082	3.18263	3	1447.82	-0.327163	54.6653	2
	High	LISWYDNEFGYSNR	2	1	1	P04406		0	0	1.082e-06	2.85198	2	1763.8	0.827363	129.635	0
	High	VVDLMAHMASK	2	1	1	P04406		0	0	0.002317	2.72166	2	1201.61	0.00650977	85.8031	0
	High	VPTANVSVVDLTcR	6	1	1	P04406	C13(Carbamidomethyl)	0	0	0.001636	2.57625	2	1530.8	2.44322	98.9647	0
	High	IISNAScTTNcLAPLAK	2	1	1	P04406	C7(Carbamidomethyl); C11(Carbamidomethyl)	0	0	3.774e-07	2.55973	2	1833.92	1.41859	86.8443	0
	High	LVINGNPITIFQER	2	1	1	P04406		0	0	3.834e-07	2.40212	2	1613.9	-0.146766	134.081	0
	High	AGAHLQGGAK	2	1	1	P04406		0	0.001	0.004139	2.3728	2	909.49	-0.113764	17.7524	0
	High	LVINGNPITIFQERDPSK	1	1	1	P04406		0	0.008	0.03119	1.77218	3	2041.11	0.717623	126.033	1
	High	QASEGPLK	1	1	1	P04406		0	0.009	0.03732	1.7526	2	829.441	-0.144099	32.6128	0
P35579	Myosin-9 OS=Homo sapiens GN=MYH9 PE=1 SV=4 - [MYH9_HUMAN]	76.1991	13.98	1	22	22	35	1960	226.392	5.60498
	A2	Sequence	# PSMs	# Proteins	# Protein Groups	Protein Group Accessions	Modifications	ΔCn	q-Value	PEP	XCorr	Charge	MH+ [Da]	ΔM [ppm]	RT [min]	# Missed Cleavages
	High	QAQQERDELADEIANSSGK	2	1	1	P35579		0	0	0.0007046	3.22917	3	2088.98	0.736155	84.0683	1
	High	TEMEDLMSSKDDVGK	2	1	1	P35579		0	0	5.068e-05	3.18645	2	1684.74	0.576573	86.8509	1
	High	NAEQYKDQADKASTR	1	1	1	P35579		0	0	4.473e-06	3.12407	3	1724.82	-0.367158	41.2799	2
	High	NTDQASMPDNTAAQK	2	1	1	P35579		0	0	8.645e-05	2.96898	2	1591.7	0.356101	41.0513	0
	High	KGAGDGSDEEVDGKADGAEAKPAE	1	1	1	P35579		0	0	0.0007056	2.71414	3	2303.03	0.323437	41.5676	2
	High	ELEDATETADAMNR	2	1	1	P35579		0	0	0.002268	2.64971	2	1565.67	-0.408364	71.0702	0
	High	IAEFTTNLTEEEEKSK	2	1	1	P35579		0	0	0.0004525	2.36807	2	1868.92	1.92728	86.9195	1
	High	IAQLEEQLDNETKER	2	1	1	P35579		0	0	0.0009578	2.29829	2	1815.91	-0.609689	86.0233	1
	High	QLEEAEEEAQR	2	1	1	P35579		0	0	0.001071	2.23915	2	1331.61	-0.42969	49.2434	0
	High	VIQYLAYVASSHK	1	1	1	P35579		0	0	0.002884	2.17652	3	1478.8	1.41294	105.533	0
	High	ALELDSNLYR	2	1	1	P35579		0	0	0.0003589	2.17123	2	1193.62	0.421783	99.6052	0
	High	LDPHLVLDQLR	3	1	1	P35579		0	0	0.0006622	1.74228	3	1318.75	0.19695	116.964	0
	High	TLEEEAKTHEAQIQEMR	2	1	1	P35579		0	0.001	0.005325	3.49309	3	2042.99	2.44686	93.0322	1
	High	ALEEAMEQK	2	1	1	P35579		0	0.001	0.006674	2.94454	2	1048.5	-0.493256	54.525	0
	High	VEAQLQELQVK	2	1	1	P35579		0	0.001	0.003428	2.31392	2	1284.72	1.15314	86.3526	0
	High	EMEAELEDER	1	1	1	P35579		0	0.001	0.007056	2.16783	2	1250.52	-0.427158	68.3904	0
	High	DLEGLSQR	1	1	1	P35579		0	0.003	0.0122	2.22184	2	917.469	0.271839	64.3444	0
	High	QEEEMMAKEEELVK	1	1	1	P35579		0	0.005	0.02398	2.95024	3	1722.79	1.31336	87.5213	1
	High	GALALEEK	1	1	1	P35579		0	0.007	0.02626	1.9699	2	830.462	0.561822	59.5698	0
	High	IAQLEEQLDNETK	1	1	1	P35579		0	0.008	0.03403	1.79038	2	1530.77	3.05298	86.5248	0
	High	NTNPNFVR	1	1	1	P35579		0	0.008	0.03245	1.78152	2	961.484	-0.580005	50.9735	0
	High	YEILTPNSIPK	1	1	1	P35579		0	0.009	0.0394	2.06643	2	1274.7	0.305319	102.428	0
P07355	Annexin A2 OS=Homo sapiens GN=ANXA2 PE=1 SV=2 - [ANXA2_HUMAN]	65.8726	39.23	1	12	12	32	339	38.5798	7.75244
	A2	Sequence	# PSMs	# Proteins	# Protein Groups	Protein Group Accessions	Modifications	ΔCn	q-Value	PEP	XCorr	Charge	MH+ [Da]	ΔM [ppm]	RT [min]	# Missed Cleavages
	High	RAEDGSVIDYELIDQDAR	7	1	1	P07355		0	0	7.275e-08	3.48053	3	2064.98	0.660067	107.981	1
	High	TDLEKDIISDTSGDFRK	2	1	1	P07355		0	0	4.914e-06	3.41137	3	1939.96	1.52476	109.201	2
	High	SLYYYIQQDTK	3	1	1	P07355		0	0	8.524e-05	3.14926	2	1421.7	3.27574	106.557	0
	High	TPAQYDASELK	4	1	1	P07355		0	0	0.001883	3.11331	2	1222.59	-0.526217	63.7101	0
	High	TNQELQEINR	2	1	1	P07355		0	0	0.0002943	3.10785	2	1244.62	-0.121295	59.858	0
	High	AEDGSVIDYELIDQDAR	2	1	1	P07355		0	0	2.298e-05	2.68682	2	1908.88	0.840995	115.429	0
	High	TPAQYDASELKASMK	2	1	1	P07355		0	0	2.616e-05	2.67122	2	1639.8	0.631466	79.4957	1
	High	LSLEGDHSTPPSAYGSVK	4	1	1	P07355		0	0	2.023e-06	2.33554	3	1844.9	0.30301	79.4923	0
	High	GVDEVTIVNILTNR	2	1	1	P07355		0	0	0.001024	2.33505	2	1542.85	1.66742	137.653	0
	High	QDIAFAYQR	1	1	1	P07355		0	0.002	0.009086	2.37264	2	1111.55	-3.27041	85.638	0
	High	SYSPYDMLESIR	2	1	1	P07355		0	0.003	0.01116	1.58123	2	1460.67	1.42326	134.83	0
	High	AYTNFDAER	1	1	1	P07355		0	0.008	0.03046	1.82683	2	1086.48	-1.07409	66.613	0
P35527	Keratin, type I cytoskeletal 9 OS=Homo sapiens GN=KRT9 PE=1 SV=3 - [K1C9_HUMAN]	60.4666	24.24	1	11	11	27	623	62.0268	5.23682
	A2	Sequence	# PSMs	# Proteins	# Protein Groups	Protein Group Accessions	Modifications	ΔCn	q-Value	PEP	XCorr	Charge	MH+ [Da]	ΔM [ppm]	RT [min]	# Missed Cleavages
	High	EIETYHNLLEGGQEDFESSGAGK	2	1	1	P35527		0	0	1.13018e-12	4.51049	3	2510.14	2.47969	110.352	0
	High	GGSGGSYGGGGSGGGYGGGSGSR	4	1	1	P35527		0	0	2.252e-08	3.55481	2	1791.73	-0.460444	40.7842	0
	High	VQALEEANNDLENK	2	1	1	P35527		0	0	0.0003271	2.88455	2	1586.76	-3.42194	76.4428	0
	High	SGGGGGGGLGSGGSIR	3	1	1	P35527		0	0	0.0002968	2.74969	2	1232.6	-0.0530432	48.3316	0
	High	FSSSSGYGGGSSR	2	1	1	P35527		0	0	0.0003089	2.72966	2	1235.53	-1.4052	41.9041	0
	High	TLNDMRQEYEQLIAK	1	1	1	P35527		0	0	0.0005418	1.73971	2	1851.92	-1.35817	123.454	1
	High	QVLDNLTMEK	3	1	1	P35527		0	0.001	0.003588	2.77172	2	1190.61	0.168777	86.9409	0
	High	STMQELNSR	2	1	1	P35527		0	0.001	0.006485	2.20936	2	1065.5	0.625339	49.2828	0
	High	STmQELNSR	3	1	1	P35527	M3(Oxidation)	0	0.002	0.007822	2.0518	2	1081.49	-0.212804	29.2871	0
	High	TLLDIDNTR	1	1	1	P35527		0	0.004	0.01567	2.0245	2	1060.56	0.268661	88.1349	0
	High	QVLDNLTmEK	2	1	1	P35527	M8(Oxidation)	0	0.005	0.02076	2.13422	2	1206.6	-0.57641	74.5543	0
	High	FSSSGGGGGGGR	1	1	1	P35527		0	0.008	0.02713	1.75522	2	982.434	0.374916	18.6584	0
	High	MTLDDFR	1	1	1	P35527		0	0.008	0.02784	1.55808	2	897.413	-0.0351597	98.3084	0
P07437	Tubulin beta chain OS=Homo sapiens GN=TUBB PE=1 SV=2 - [TBB5_HUMAN]	60.0175	23.65	1	10	10	28	444	49.639	4.89404
	A2	Sequence	# PSMs	# Proteins	# Protein Groups	Protein Group Accessions	Modifications	ΔCn	q-Value	PEP	XCorr	Charge	MH+ [Da]	ΔM [ppm]	RT [min]	# Missed Cleavages
	High	LAVNMVPFPR	2	1	1	P07437		0	0	0.002925	3.38156	2	1143.63	-3.14472	117.185	0
	High	IMNTFSVVPSPK	3	1	1	P07437		0	0	1.819e-05	3.28893	2	1319.7	1.26094	102.882	0
	High	EVDEQMLNVQNK	4	1	1	P07437		0	0	7.456e-05	3.26513	2	1446.69	-2.96202	77.9289	0
	High	ISVYYNEATGGK	3	1	1	P07437		0	0	0.00135	2.65962	2	1301.64	-1.11515	76.6163	0
	High	FPGQLNADLR	4	1	1	P07437		0	0	0.0001161	2.28483	2	1130.59	-1.04148	92.667	0
	High	AILVDLEPGTMDSVR	5	1	1	P07437		0	0	0.0002235	2.12511	2	1615.84	2.05575	120.821	0
	High	NMMAAcDPR	2	1	1	P07437	C6(Carbamidomethyl)	0	0.001	0.004087	2.49099	2	1065.43	1.29085	54.6036	0
	High	ISEQFTAMFR	2	1	1	P07437		0	0.001	0.004256	2.09274	2	1229.61	7.39112	122.96	0
	High	NSSYFVEWIPNNVK	1	1	1	P07437		0	0.001	0.007284	1.4786	2	1696.84	2.47785	133.621	0
	High	FPGQLNADLRK	2	1	1	P07437		0	0.005	0.02014	2.24112	2	1258.69	1.10169	77.4007	1
P13645	Keratin, type I cytoskeletal 10 OS=Homo sapiens GN=KRT10 PE=1 SV=6 - [K1C10_HUMAN]	57.9592	20.89	1	10	12	24	584	58.7917	5.21143
	A2	Sequence	# PSMs	# Proteins	# Protein Groups	Protein Group Accessions	Modifications	ΔCn	q-Value	PEP	XCorr	Charge	MH+ [Da]	ΔM [ppm]	RT [min]	# Missed Cleavages
	High	ALEESNYELEGK	2	1	1	P13645		0	0	8.576e-06	4.05561	2	1381.65	0.455984	73.465	0
	High	SQYEQLAEQNR	2	1	1	P13645		0	0	1.336e-05	3.34415	2	1365.64	0.595338	61.8196	0
	High	LENEIQTYR	2	1	1	P13645		0	0	0.001979	2.97477	2	1165.58	0.0644877	67.5848	0
	High	QSLEASLAETEGR	2	1	1	P13645		0	0	0.002261	2.72149	2	1390.68	1.50983	92.3331	0
	High	VLDELTLTK	2	1	1	P13645		0	0	0.001106	2.52445	2	1031.6	-2.0476	92.6638	0
	High	SLLEGEGSSGGGGR	2	1	1	P13645		0	0	2.684e-05	2.42991	2	1262.6	0.00337994	56.6273	0
	High	GSLGGGFSSGGFSGGSFSR	2	1	1	P13645		0	0	0.001905	2.12846	2	1707.77	-2.26796	106.471	0
	High	DAEAWFNEK	2	1	1	P13645		0	0.001	0.005725	2.4812	2	1109.49	0.370146	101.487	0
	High	VTMQNLNDR	4	2	2	P13645;P02533		0	0.001	0.003914	1.98655	2	1090.53	-3.66443	59.2549	0
	High	YENEVALR	2	1	1	P13645		0	0.003	0.01249	2.11191	2	993.5	0.0879053	61.514	0
	High	IRLENEIQTYR	1	1	1	P13645		0	0.008	0.03247	2.33856	3	1434.77	-0.43143	86.4965	1
	High	LAADDFR	1	2	2	P13645;P02533		0	0.008	0.02722	2.23032	2	807.398	-2.05044	66.4784	0
P21333	Filamin-A OS=Homo sapiens GN=FLNA PE=1 SV=4 - [FLNA_HUMAN]	54.2995	11.07	1	18	19	27	2647	280.564	6.06201
	A2	Sequence	# PSMs	# Proteins	# Protein Groups	Protein Group Accessions	Modifications	ΔCn	q-Value	PEP	XCorr	Charge	MH+ [Da]	ΔM [ppm]	RT [min]	# Missed Cleavages
	High	VTAQGPGLEPSGNIANK	2	1	1	P21333		0	0	0.001701	3.26066	2	1652.86	2.34262	66.8602	0
	High	ATcAPQHGAPGPGPADASK	2	1	1	P21333	C3(Carbamidomethyl)	0	0	0.0002313	2.80373	3	1789.82	-2.38531	35.838	0
	High	VANPSGNLTETYVQDR	2	1	1	P21333		0	0	3.838e-06	2.78045	2	1763.86	2.533	82.3536	0
	High	IANLQTDLSDGLR	2	1	1	P21333		0	0	0.00148	2.75306	2	1415.75	0.170798	107.232	0
	High	GAGTGGLGLAVEGPSEAK	2	1	1	P21333		0	0	0.00138	2.66593	2	1570.81	3.61756	86.3623	0
	High	ANLPQSFQVDTSK	1	1	1	P21333		0	0	0.0005835	2.20252	2	1434.72	1.57917	86.1352	0
	High	AFGPGLQGGSAGSPAR	2	1	1	P21333		0	0	0.001851	2.08293	2	1429.72	-0.278512	71.8538	0
	High	AGQSAAGAAPGGGVDTR	2	1	1	P21333		0	0	0.002089	1.5585	2	1442.7	1.57193	38.4735	0
	High	IQQNTFTR	2	3	3	P21333;O75369;Q14315		0	0.001	0.005538	1.80602	2	1007.53	0.486388	48.8695	0
	High	EATTEFSVDAR	1	1	1	P21333		0	0.001	0.005685	1.4324	2	1225.57	1.23307	73.5667	0
	High	AEAGVPAEFSIWTR	1	1	1	P21333		0	0.002	0.01084	2.08075	2	1533.77	2.62616	132.641	0
	High	SPFSVAVSPSLDLSK	1	1	1	P21333		0	0.003	0.01149	2.05577	2	1533.82	-0.242496	119.655	0
	High	TGVAVNKPAEFTVDAK	1	1	1	P21333		0	0.005	0.01895	2.24114	3	1646.87	-0.327004	77.5151	0
	High	TGVELGKPTHFTVNAK	1	1	1	P21333		0	0.008	0.03464	2.53693	3	1698.91	-3.82508	79.7943	0
	High	VPVHDVTDASK	1	1	1	P21333		0	0.008	0.02813	2.41413	2	1167.6	1.07131	36.4403	0
	High	YGGDEIPFSPYR	1	1	1	P21333		0	0.008	0.03486	2.11215	2	1400.65	-0.284599	110.865	0
	High	IVGPSGAAVPcKVEPGLGADNSVVR	1	1	1	P21333	C11(Carbamidomethyl)	0	0.009	0.03923	2.66323	3	2449.29	1.389	90.4243	1
	High	YGGQPVPNFPSK	1	1	1	P21333		0	0.009	0.0385	2.63874	2	1290.65	-1.04707	80.0225	0
	High	GLVEPVDVVDNADGTQTVNYVPSR	1	1	1	P21333		0	0.009	0.0394	1.98692	3	2544.27	3.53991	112.45	0
P02545	Prelamin-A/C OS=Homo sapiens GN=LMNA PE=1 SV=1 - [LMNA_HUMAN]	51.6623	22.29	1	12	12	23	664	74.0947	7.02002
	A2	Sequence	# PSMs	# Proteins	# Protein Groups	Protein Group Accessions	Modifications	ΔCn	q-Value	PEP	XCorr	Charge	MH+ [Da]	ΔM [ppm]	RT [min]	# Missed Cleavages
	High	ITESEEVVSR	2	1	1	P02545		0	0	5.765e-05	3.01466	2	1148.58	-0.759626	50.0916	0
	High	LADALQELR	2	1	1	P02545		0	0	0.000918	2.8581	2	1028.57	-1.55	93.6149	0
	High	NSNLVGAAHEELQQSR	4	1	1	P02545		0	0	9.991e-07	2.79442	2	1752.86	0.378471	80.0989	0
	High	TALINSTGEEVAMR	2	1	1	P02545		0	0	0.0008214	2.76161	2	1491.75	2.85647	86.3084	0
	High	SGAQASSTPLSPTR	2	1	1	P02545		0	0	0.001815	2.55418	2	1359.69	0.707632	47.8102	0
	High	VAVEEVDEEGKFVR	2	1	1	P02545		0	0	0.0003458	2.27871	2	1605.82	2.18331	80.6515	1
	High	SLETENAGLR	2	1	1	P02545		0	0	0.001012	2.14131	2	1089.55	-0.015515	59.4015	0
	High	AAYEAELGDAR	2	1	1	P02545		0	0	0.0006829	2.07181	2	1165.55	-2.6731	69.1438	0
	High	LQEKEDLQELNDR	2	1	1	P02545		0	0	0.002749	2.01231	3	1629.81	0.727008	68.3553	1
	High	IDSLSAQLSQLQK	1	1	1	P02545		0	0.001	0.00683	2.35756	2	1430.78	-0.107397	108.211	0
	High	SVGGSGGGSFGDNLVTR	1	1	1	P02545		0	0.005	0.01908	1.7846	2	1566.75	-1.00092	86.0266	0
	High	LAVYIDR	1	1	1	P02545		0	0.008	0.03624	1.43962	2	849.483	0.126536	78.6767	0
P08238	Heat shock protein HSP 90-beta OS=Homo sapiens GN=HSP90AB1 PE=1 SV=4 - [HS90B_HUMAN]	49.1027	22.38	1	8	13	22	724	83.2121	5.03369
	A2	Sequence	# PSMs	# Proteins	# Protein Groups	Protein Group Accessions	Modifications	ΔCn	q-Value	PEP	XCorr	Charge	MH+ [Da]	ΔM [ppm]	RT [min]	# Missed Cleavages
	High	GVVDSEDLPLNISR	3	2	2	P07900;P08238		0	0	5.902e-06	3.30349	2	1513.79	1.01583	108.619	0
	High	IDIIPNPQER	2	1	1	P08238		0	0	0.0001798	2.86035	2	1194.65	-0.11777	91.5025	0
	High	YHTSQSGDEMTSLSEYVSR	1	1	1	P08238		0	0	1.32e-05	2.56967	3	2176.94	-0.55464	103.114	0
	High	SIYYITGESK	2	1	1	P08238		0	0	0.001891	2.55409	2	1160.58	0.12269	83.4421	0
	High	ADLINNLGTIAK	3	2	2	P07900;P08238		0	0	0.001631	2.51842	2	1242.71	0.16145	107.062	0
	High	NPDDITQEEYGEFYK	2	1	1	P08238		0	0	0.0008703	2.47898	2	1847.8	3.09052	104.541	0
	High	ELISNASDALDK	1	2	2	P14625;P08238		0	0.001	0.007247	2.45874	2	1275.65	1.81542	80.8075	0
	High	YESLTDPSKLDSGK	1	2	2	P07900;P08238		0	0.001	0.003845	2.21414	2	1539.75	0.448662	71.1348	1
	High	DNSTMGYMMAK	1	1	1	P08238		0	0.002	0.008911	2.36507	2	1248.5	-1.38997	84.6099	0
	High	YIDQEELNK	2	2	2	P07900;P08238		0	0.002	0.009531	1.92534	2	1151.56	-0.125433	59.922	0
	High	LGIHEDSTNR	2	1	1	P08238		0	0.003	0.0111	1.85792	2	1141.56	-0.902232	39.6983	0
	High	HLEINPDHPIVETLR	1	1	1	P08238		0	0.005	0.0241	2.82984	3	1782.96	3.26383	98.2596	0
	High	EQVANSAFVER	1	1	1	P08238		0	0.005	0.02438	2.63098	2	1249.62	-0.852129	66.3789	0
P00558	Phosphoglycerate kinase 1 OS=Homo sapiens GN=PGK1 PE=1 SV=3 - [PGK1_HUMAN]	47.2875	34.77	1	11	11	21	417	44.5861	8.104
	A2	Sequence	# PSMs	# Proteins	# Protein Groups	Protein Group Accessions	Modifications	ΔCn	q-Value	PEP	XCorr	Charge	MH+ [Da]	ΔM [ppm]	RT [min]	# Missed Cleavages
	High	LGDVYVNDAFGTAHR	4	1	1	P00558		0	0	7.227e-05	3.22419	2	1634.79	0.865798	97.6133	0
	High	VLPGVDALSNI	2	1	1	P00558		0	0	0.002466	2.94103	2	1097.62	-0.77532	133.482	0
	High	AHSSMVGVNLPQK	2	1	1	P00558		0	0	0.002139	2.84446	2	1367.71	1.12169	68.5745	0
	High	AEPAKIEAFR	2	1	1	P00558		0	0	0.001188	2.78594	2	1131.62	-0.198995	66.8336	1
	High	ALESPERPFLAILGGAK	1	1	1	P00558		0	0	1.721e-06	2.73488	3	1768.99	-0.448899	133.958	0
	High	NNQITNNQR	2	1	1	P00558		0	0	0.002967	2.50446	2	1101.54	0.89297	22.8386	0
	High	VLNNMEIGTSLFDEEGAK	2	1	1	P00558		0	0	1.911e-06	2.30396	2	1966.95	1.3314	128.331	0
	High	VDFNVPMKNNQITNNQR	1	1	1	P00558		0	0.005	0.02375	1.92871	3	2032	0.116476	86.1284	1
	High	AGGFLMK	2	1	1	P00558		0	0.005	0.0209	1.91712	2	723.386	0.829257	77.7869	0
	High	TGQATVASGIPAGWMGLDcGPESSKK	1	1	1	P00558	C19(Carbamidomethyl)	0	0.005	0.02046	1.48906	3	2605.24	-0.337479	118.072	1
	High	YSLEPVAVELK	2	1	1	P00558		0	0.008	0.02954	2.41516	2	1247.69	0.136886	110.385	0
P07900	Heat shock protein HSP 90-alpha OS=Homo sapiens GN=HSP90AA1 PE=1 SV=5 - [HS90A_HUMAN]	46.4806	17.21	1	7	11	21	732	84.6067	5.021
	A2	Sequence	# PSMs	# Proteins	# Protein Groups	Protein Group Accessions	Modifications	ΔCn	q-Value	PEP	XCorr	Charge	MH+ [Da]	ΔM [ppm]	RT [min]	# Missed Cleavages
	High	NPDDITNEEYGEFYK	2	1	1	P07900		0	0	1.257e-10	3.44842	2	1833.78	1.26389	102.596	0
	High	GVVDSEDLPLNISR	3	2	2	P07900;P08238		0	0	5.902e-06	3.30349	2	1513.79	1.01583	108.619	0
	High	DQVANSAFVER	2	1	1	P07900		0	0	0.001182	3.11569	2	1235.6	0.34397	67.4009	0
	High	ADLINNLGTIAK	3	2	2	P07900;P08238		0	0	0.001631	2.51842	2	1242.71	0.16145	107.062	0
	High	LGIHEDSQNR	3	1	1	P07900		0	0	0.0005507	2.39358	3	1168.57	-0.0877802	37.3509	0
	High	APFDLFENR	1	1	1	P07900		0	0	0.0007799	2.22234	2	1108.54	0.258689	123.691	0
	High	DNSTMGYMAAK	2	1	1	P07900		0	0.001	0.006963	2.68648	2	1188.5	1.17835	66.6495	0
	High	YESLTDPSKLDSGK	1	2	2	P07900;P08238		0	0.001	0.003845	2.21414	2	1539.75	0.448662	71.1348	1
	High	YIDQEELNK	2	2	2	P07900;P08238		0	0.002	0.009531	1.92534	2	1151.56	-0.125433	59.922	0
	High	ELISNSSDALDKIR	1	1	1	P07900		0	0.008	0.03439	1.89681	2	1560.83	1.61048	89.1676	1
	High	FYEQFSK	1	1	1	P07900		0	0.009	0.03754	1.67242	2	948.445	-1.38066	73.7589	0
P35908	Keratin, type II cytoskeletal 2 epidermal OS=Homo sapiens GN=KRT2 PE=1 SV=2 - [K22E_HUMAN]	44.7191	19.41	1	7	9	18	639	65.3932	8.00146
	A2	Sequence	# PSMs	# Proteins	# Protein Groups	Protein Group Accessions	Modifications	ΔCn	q-Value	PEP	XCorr	Charge	MH+ [Da]	ΔM [ppm]	RT [min]	# Missed Cleavages
	High	FLEQQNQVLQTK	4	2	2	P35908;P04264		0	0	8.25e-06	3.76595	2	1475.79	0.830284	79.123	0
	High	HGGGGGGFGGGGFGSR	2	1	1	P35908		0	0	0.0005108	3.3086	3	1320.58	-0.016601	61.7694	0
	High	GGSSSGGGYGSGGGGSSSVK	2	1	1	P35908		0	0	3.35e-06	2.54854	2	1588.68	0.0364946	29.1589	0
	High	AQYEEIAQR	3	1	1	P35908		0	0	0.0001729	2.51439	2	1107.54	-0.602571	56.1909	0
	High	GSSSGGGYSSGSSSYGSGGR	2	1	1	P35908		0	0	0.000367	2.31893	2	1740.71	2.23412	41.6871	0
	High	GGSISGGGYGSGGGK	2	1	1	P35908		0	0.001	0.006392	1.9586	2	1197.55	0.887986	37.3541	0
	High	IEISELNR	1	2	2	P35908;P04264		0	0.003	0.01388	2.64862	2	973.531	-0.0346175	79.3435	0
	High	SKEEAEALYHSK	1	1	1	P35908		0	0.004	0.01645	2.88279	3	1391.68	-1.44864	49.7139	1
	High	TAAENDFVTLKK	1	1	1	P35908		0	0.004	0.01556	1.84009	2	1336.71	1.2558	72.1424	1
P04075	Fructose-bisphosphate aldolase A OS=Homo sapiens GN=ALDOA PE=1 SV=2 - [ALDOA_HUMAN]	44.4619	28.57	1	9	9	19	364	39.3953	8.08936
	A2	Sequence	# PSMs	# Proteins	# Protein Groups	Protein Group Accessions	Modifications	ΔCn	q-Value	PEP	XCorr	Charge	MH+ [Da]	ΔM [ppm]	RT [min]	# Missed Cleavages
	High	GILAADESTGSIAK	4	1	1	P04075		0	0	1.42e-05	3.95276	2	1332.7	-0.459615	75.9264	0
	High	VDKGVVPLAGTNGETTTQGLDGLSER	2	1	1	P04075		0	0	5.751e-11	3.83823	3	2614.34	1.49534	98.516	1
	High	IGEHTPSALAIMENANVLAR	2	1	1	P04075		0	0	0.002832	3.29771	3	2107.1	2.10004	131.277	0
	High	GILAADESTGSIAKR	2	1	1	P04075		0	0	0.0002733	2.82199	2	1488.8	0.131771	68.3715	1
	High	ADDGRPFPQVIK	2	1	1	P04075		0	0	4.404e-07	2.6972	3	1342.71	-0.94816	81.3919	0
	High	AAQEEYVKR	4	1	1	P04075		0	0	0.00281	2.57408	2	1093.56	0.18204	33.4096	1
	High	GVVPLAGTNGETTTQGLDGLSER	1	1	1	P04075		0	0.001	0.004479	2.92868	3	2272.16	6.75802	105.295	0
	High	ALQASALK	1	1	1	P04075		0	0.002	0.01036	2.16722	2	801.483	-0.33528	48.9712	0
	High	LQSIGTENTEENRR	1	1	1	P04075		0	0.009	0.03931	1.36412	3	1646.81	-0.643432	46.4869	1
P00338	L-lactate dehydrogenase A chain OS=Homo sapiens GN=LDHA PE=1 SV=2 - [LDHA_HUMAN]	43.8039	27.11	1	8	9	22	332	36.6654	8.26514
	A2	Sequence	# PSMs	# Proteins	# Protein Groups	Protein Group Accessions	Modifications	ΔCn	q-Value	PEP	XCorr	Charge	MH+ [Da]	ΔM [ppm]	RT [min]	# Missed Cleavages
	High	QVVESAYEVIK	2	1	1	P00338		0	0	7.936e-05	3.23032	2	1264.68	-0.385281	90.0318	0
	High	SADTLWGIQK	2	1	1	P00338		0	0	0.0008013	2.99583	2	1118.58	-0.716753	99.8289	0
	High	IVSGKDYNVTANSK	2	1	1	P00338		0	0	0.001288	2.81909	2	1495.78	1.00792	48.0164	1
	High	LVIITAGAR	3	1	1	P00338		0	0	0.0004442	2.65029	2	913.583	-0.520156	81.2732	0
	High	VTLTSEEEAR	4	1	1	P00338		0	0	3.293e-05	2.33555	2	1134.56	0.00617142	54.7797	0
	High	VIGSGcNLDSAR	4	2	2	P00338;P07195	C6(Carbamidomethyl)	0	0	0.001824	1.63557	2	1248.6	0.269234	57.0462	0
	High	DYNVTANSK	2	1	1	P00338		0	0.004	0.01657	1.76997	2	1011.48	0.88279	40.368	0
	High	DQLIYNLLK	2	1	1	P00338		0	0.005	0.01971	1.8111	2	1119.64	-0.613574	131.545	0
	High	DLADELALVDVIEDK	1	1	1	P00338		0	0.008	0.03308	1.59796	2	1657.85	0.162773	141.642	0
P07237	Protein disulfide-isomerase OS=Homo sapiens GN=P4HB PE=1 SV=3 - [PDIA1_HUMAN]	43.1281	18.31	1	8	8	18	508	57.0807	4.86865
	A2	Sequence	# PSMs	# Proteins	# Protein Groups	Protein Group Accessions	Modifications	ΔCn	q-Value	PEP	XCorr	Charge	MH+ [Da]	ΔM [ppm]	RT [min]	# Missed Cleavages
	High	VDATEESDLAQQYGVR	6	1	1	P07237		0	0	5.121e-09	3.87701	3	1780.83	-4.93442	96.8072	0
	High	YKPESEELTAER	4	1	1	P07237		0	0	0.003001	2.54293	3	1451.7	-0.689042	57.9831	0
	High	MDSTANEVEAVK	2	1	1	P07237		0	0	0.000383	2.32916	2	1293.6	2.44373	58.9711	0
	High	TVIDYNGER	2	1	1	P07237		0	0	0.003015	2.0979	2	1066.52	-1.14108	61.1149	0
	High	LITLEEEMTK	1	1	1	P07237		0	0	0.0005747	1.91163	2	1206.63	-0.077623	104.366	0
	High	SVSDYDGKLSNFK	1	1	1	P07237		0	0.008	0.02874	2.02922	2	1459.71	0.0460347	80.3011	1
	High	EADDIVNWLK	1	1	1	P07237		0	0.008	0.03213	1.80874	2	1202.61	1.04075	130.712	0
	High	NFEDVAFDEKK	1	1	1	P07237		0	0.009	0.03645	2.57433	2	1341.63	-1.32123	85.4352	1
P02768	Serum albumin OS=Homo sapiens GN=ALB PE=1 SV=2 - [ALBU_HUMAN]	42.444	6.9	1	5	5	20	609	69.3215	6.27783
	A2	Sequence	# PSMs	# Proteins	# Protein Groups	Protein Group Accessions	Modifications	ΔCn	q-Value	PEP	XCorr	Charge	MH+ [Da]	ΔM [ppm]	RT [min]	# Missed Cleavages
	High	KVPQVSTPTLVEVSR	7	1	1	P02768		0	0	3.037e-09	4.12422	3	1639.93	-3.15254	87.533	1
	High	VPQVSTPTLVEVSR	8	1	1	P02768		0	0	0.000617	2.82966	2	1511.85	4.90526	97.8001	0
	High	DVFLGmFLYEYAR	2	1	1	P02768	M6(Oxidation)	0	0	0.0007412	2.25974	2	1639.78	-2.10758	141.958	0
	High	YLYEIAR	2	1	1	P02768		0	0.005	0.02194	1.77329	2	927.494	0.586331	87.5789	0
	High	LVTDLTK	1	1	1	P02768		0	0.005	0.01785	1.10262	2	789.472	0.212872	57.294	0
P11142	Heat shock cognate 71 kDa protein OS=Homo sapiens GN=HSPA8 PE=1 SV=1 - [HSP7C_HUMAN]	41.7495	22.45	1	9	12	24	646	70.8542	5.51611
	A2	Sequence	# PSMs	# Proteins	# Protein Groups	Protein Group Accessions	Modifications	ΔCn	q-Value	PEP	XCorr	Charge	MH+ [Da]	ΔM [ppm]	RT [min]	# Missed Cleavages
	High	NSLESYAFNMK	2	1	1	P11142		0	0	0.0008944	3.042	2	1303.6	0.406155	110.558	0
	High	TVTNAVVTVPAYFNDSQR	4	1	1	P11142		0	0	0.0001423	2.85141	3	1982	-0.561578	112.233	0
	High	VEIIANDQGNR	4	3	3	P11021;P34931;P11142		0	0	8.743e-05	2.60628	2	1228.63	1.19068	55.1643	0
	High	IINEPTAAAIAYGLDK	1	3	3	P11021;P34931;P11142		0	0	9.368e-05	2.43602	2	1659.89	-4.40045	119.975	0
	High	STAGDTHLGGEDFDNR	2	1	1	P11142		0	0	0.001021	2.13421	2	1691.73	0.849475	64.2001	0
	High	TTPSYVAFTDTER	2	2	2	P34931;P11142		0	0	0.001273	2.06231	2	1487.7	0.512647	93.1633	0
	High	SFYPEEVSSMVLTK	2	1	1	P11142		0	0.001	0.003578	1.7889	2	1616.78	-3.80977	128.542	0
	High	FDDAVVQSDMK	2	1	1	P11142		0	0.002	0.0108	2.37256	2	1254.57	-1.23704	79.0974	0
	High	NQVAMNPTNTVFDAK	1	1	1	P11142		0	0.003	0.01188	2.62963	2	1649.79	-0.620834	91.9669	0
	High	LSKEDIER	2	1	1	P11142		0	0.003	0.01319	2.55946	2	989.527	0.782028	41.7602	1
	High	MKEIAEAYLGK	1	1	1	P11142		0	0.008	0.0274	1.98262	2	1252.66	-0.357201	83.9899	1
	High	RFDDAVVQSDMK	1	1	1	P11142		0	0.009	0.03929	2.92868	2	1410.67	-0.353798	73.5569	1
P67936	Tropomyosin alpha-4 chain OS=Homo sapiens GN=TPM4 PE=1 SV=3 - [TPM4_HUMAN]	41.2626	25	1	4	8	18	248	28.5045	4.69092
	A2	Sequence	# PSMs	# Proteins	# Protein Groups	Protein Group Accessions	Modifications	ΔCn	q-Value	PEP	XCorr	Charge	MH+ [Da]	ΔM [ppm]	RT [min]	# Missed Cleavages
	High	KIQALQQQADEAEDR	4	1	1	P67936		0	0	4.925e-11	5.19819	3	1742.87	-0.838104	61.9065	1
	High	IQALQQQADEAEDR	2	1	1	P67936		0	0	5.25e-06	3.50407	2	1614.78	2.05154	67.0984	0
	High	LEEAEKAADESER	4	2	2	P09493;P67936		0	0	6.925e-05	3.00769	2	1476.68	0.3176	41.3145	1
	High	AEGDVAALNR	2	1	1	P67936		0	0	0.0002838	2.28797	2	1015.52	-1.07207	53.4021	0
	High	IQLVEEELDR	2	2	2	P09493;P67936		0	0	6.908e-05	2.03385	2	1243.66	2.71482	98.6815	0
	High	IQLVEEELDRAQER	2	2	2	P09493;P67936		0	0	0.001704	1.72941	3	1727.89	-0.019792	100.003	1
	High	MEIQEMQLK	1	1	1	P67936		0	0.001	0.003948	1.87749	2	1149.56	-0.790917	93.7843	0
	High	RIQLVEEELDRAQER	1	2	2	P09493;P67936		0	0.008	0.03152	2.80652	3	1884	4.03951	99.1573	2
Q14315	Filamin-C OS=Homo sapiens GN=FLNC PE=1 SV=3 - [FLNC_HUMAN]	41.1449	5.06	1	10	11	18	2725	290.841	5.97314
	A2	Sequence	# PSMs	# Proteins	# Protein Groups	Protein Group Accessions	Modifications	ΔCn	q-Value	PEP	XCorr	Charge	MH+ [Da]	ΔM [ppm]	RT [min]	# Missed Cleavages
	High	GAGTGGLGLAIEGPSEAK	1	1	1	Q14315		0	0	0.002387	2.96384	2	1584.82	0.719896	96.657	0
	High	GGLVGTPAPFSIDTK	3	1	1	Q14315		0	0	0.001581	2.69454	2	1459.78	1.01792	110.855	0
	High	GPGLSQAFVGQK	2	1	1	Q14315		0	0	0.0003274	2.68265	2	1188.64	-1.09322	81.8132	0
	High	FVPQEMGPHTVAVK	1	1	1	Q14315		0	0	4.591e-05	2.41911	2	1539.8	2.76456	78.1227	0
	High	VPQTFTVDcSQAGR	2	1	1	Q14315	C9(Carbamidomethyl)	0	0	0.0004339	2.32886	2	1565.74	-0.322585	75.1086	0
	High	IQQNTFTR	2	3	3	P21333;O75369;Q14315		0	0.001	0.005538	1.80602	2	1007.53	0.486388	48.8695	0
	High	LGSFGSITR	2	1	1	Q14315		0	0.002	0.01057	2.3272	2	937.512	2.05998	82.241	0
	High	VNQPASFAVQLNGAR	1	1	1	Q14315		0	0.003	0.01467	2.53904	2	1571.83	3.0057	96.5891	0
	High	GAGGQGQLDVR	2	1	1	Q14315		0	0.003	0.01451	2.06975	2	1057.54	-0.519919	46.1772	0
	High	YADQEVPR	1	1	1	Q14315		0	0.003	0.01479	2.01009	2	977.47	1.38934	47.642	0
	High	VAVGQEQAFSVNTR	1	1	1	Q14315		0	0.008	0.03024	1.62278	2	1505.77	1.167	81.2827	0
P14625	Endoplasmin OS=Homo sapiens GN=HSP90B1 PE=1 SV=1 - [ENPL_HUMAN]	39.1953	10.83	1	7	8	17	803	92.4113	4.84326
	A2	Sequence	# PSMs	# Proteins	# Protein Groups	Protein Group Accessions	Modifications	ΔCn	q-Value	PEP	XCorr	Charge	MH+ [Da]	ΔM [ppm]	RT [min]	# Missed Cleavages
	High	GVVDSDDLPLNVSR	2	1	1	P14625		0	0	6.088e-07	3.85246	2	1485.76	0.740002	98.832	0
	High	FQSSHHPTDITSLDQYVER	6	1	1	P14625		0	0	4.441e-06	3.21506	3	2260.06	0.783216	100.176	0
	High	DISTNYYASQK	2	1	1	P14625		0	0	0.0002731	2.81789	2	1289.6	-0.729052	66.9982	0
	High	FAFQAEVNR	2	1	1	P14625		0	0	0.002152	2.751	2	1081.54	-0.830042	90.5313	0
	High	ELISNASDALDK	1	2	2	P14625;P08238		0	0.001	0.007247	2.45874	2	1275.65	1.81542	80.8075	0
	High	LGVIEDHSNR	1	1	1	P14625		0	0.001	0.004953	1.59427	2	1139.58	-0.357716	47.1775	0
	High	DISTNYYASQKK	1	1	1	P14625		0	0.005	0.02119	1.47998	2	1417.7	0.714992	58.9573	1
	High	SILFVPTSAPR	2	1	1	P14625		0	0.008	0.03152	1.95518	2	1187.68	2.40691	108.18	0
P04083	Annexin A1 OS=Homo sapiens GN=ANXA1 PE=1 SV=2 - [ANXA1_HUMAN]	35.2271	31.5	1	9	9	17	346	38.69	7.02002
	A2	Sequence	# PSMs	# Proteins	# Protein Groups	Protein Group Accessions	Modifications	ΔCn	q-Value	PEP	XCorr	Charge	MH+ [Da]	ΔM [ppm]	RT [min]	# Missed Cleavages
	High	GDRSEDFGVNEDLADSDAR	3	1	1	P04083		0	0	2.655e-12	3.69505	3	2067.88	-0.268711	85.535	1
	High	TPAQFDADELR	1	1	1	P04083		0	0	0.002481	3.16571	2	1262.6	1.75816	85.0491	0
	High	GGPGSAVSPYPTFNPSSDVAALHK	2	1	1	P04083		0	0	1.762e-07	2.95414	3	2356.16	0.670633	108.715	0
	High	SEDFGVNEDLADSDAR	2	1	1	P04083		0	0	3.297e-08	2.72964	2	1739.74	-0.309443	91.7105	0
	High	DLAKDITSDTSGDFR	2	1	1	P04083		0	0	0.0005407	2.36644	2	1640.78	1.78031	100.541	1
	High	GTDVNVFNTILTTR	2	1	1	P04083		0	0.001	0.004961	1.97862	2	1550.82	0.674272	134.077	0
	High	SEIDMNDIK	2	1	1	P04083		0	0.005	0.0195	1.92939	2	1064.49	0.282164	77.5088	0
	High	AAYLQETGKPLDETLKK	2	1	1	P04083		0	0.005	0.02189	1.69181	3	1905.03	-0.245935	79.9547	1
	High	DITSDTSGDFR	1	1	1	P04083		0	0.008	0.02934	1.72761	2	1213.53	0.0489675	72.4705	0
P13667	Protein disulfide-isomerase A4 OS=Homo sapiens GN=PDIA4 PE=1 SV=2 - [PDIA4_HUMAN]	35.1274	12.56	1	6	6	18	645	72.887	5.07178
	A2	Sequence	# PSMs	# Proteins	# Protein Groups	Protein Group Accessions	Modifications	ΔCn	q-Value	PEP	XCorr	Charge	MH+ [Da]	ΔM [ppm]	RT [min]	# Missed Cleavages
	High	VSQGQLVVMQPEK	2	1	1	P13667		0	0	7.233e-05	3.26737	2	1442.77	2.54394	79.8233	0
	High	IDATSASVLASR	2	1	1	P13667		0	0	1.918e-05	3.11792	2	1190.64	1.86186	74.6478	0
	High	MDATANDVPSDR	2	1	1	P13667		0	0	0.001511	2.9791	2	1291.56	0.295859	48.9809	0
	High	FDVSGYPTLK	8	1	1	P13667		0	0	0.0001137	2.53828	2	1126.58	-0.553174	97.6851	0
	High	FAMEPEEFDSDTLR	2	1	1	P13667		0	0	0.0001061	2.46645	2	1686.73	0.328465	117.087	0
	High	TFDSIVMDPK	2	1	1	P13667		0	0.007	0.02655	2.13269	2	1152.56	-2.12417	98.0213	0
Q9BQE3	Tubulin alpha-1C chain OS=Homo sapiens GN=TUBA1C PE=1 SV=1 - [TBA1C_HUMAN]	34.8866	23.83	3	8	8	17	449	49.8635	5.09717
	A2	Sequence	# PSMs	# Proteins	# Protein Groups	Protein Group Accessions	Modifications	ΔCn	q-Value	PEP	XCorr	Charge	MH+ [Da]	ΔM [ppm]	RT [min]	# Missed Cleavages
	High	QLFHPEQLITGKEDAANNYAR	3	3	1	Q9BQE3		0	0	4.009e-06	3.88008	3	2415.21	2.7264	106.017	1
	High	VGINYQPPTVVPGGDLAK	2	3	1	Q9BQE3		0	0	0.0001257	2.75559	2	1824.99	2.21275	105.351	0
	High	DVNAAIATIK	2	3	1	Q9BQE3		0	0	0.0005347	2.65486	2	1015.58	-0.176979	83.2296	0
	High	AVFVDLEPTVIDEVR	2	3	1	Q9BQE3		0	0	0.0001878	2.40928	2	1701.91	0.967739	134.015	0
	High	TIGGGDDSFNTFFSETGAGK	2	3	1	Q9BQE3		0	0	3.042e-05	2.17922	2	2007.9	2.41821	129.29	0
	High	EIIDLVLDR	2	3	1	Q9BQE3		0	0	0.002099	1.92064	2	1085.62	-0.334118	129.268	0
	High	EDAANNYAR	2	3	1	Q9BQE3		0	0.002	0.008885	1.50172	2	1023.45	-0.266972	31.5225	0
	High	NLDIERPTYTNLNR	2	3	1	Q9BQE3		0	0.008	0.02921	2.36235	2	1718.88	1.30529	86.7565	0
P68104	Elongation factor 1-alpha 1 OS=Homo sapiens GN=EEF1A1 PE=1 SV=1 - [EF1A1_HUMAN]	33.1929	15.58	2	6	6	14	462	50.1091	9.01221
	A2	Sequence	# PSMs	# Proteins	# Protein Groups	Protein Group Accessions	Modifications	ΔCn	q-Value	PEP	XCorr	Charge	MH+ [Da]	ΔM [ppm]	RT [min]	# Missed Cleavages
	High	VETGVLKPGMVVTFAPVNVTTEVK	2	2	1	P68104		0	0	0.0001582	3.30619	3	2515.38	0.181035	130.755	0
	High	IGGIGTVPVGR	4	2	1	P68104		0	0	5.12e-06	3.21364	2	1025.61	-0.113376	79.4308	0
	High	YYVTIIDAPGHR	3	2	1	P68104		0	0	0.0004472	2.99228	2	1404.73	1.50369	93.3304	0
	High	STTTGHLIYK	2	2	1	P68104		0	0.001	0.003817	2.6159	2	1120.6	0.0515296	52.0091	0
	High	VETGVLKPGmVVTFAPVNVTTEVK	1	2	1	P68104	M10(Oxidation)	0	0.007	0.02575	1.78018	3	2531.37	-4.49021	118.519	0
	High	LPLQDVYK	1	2	1	P68104		0	0.008	0.03255	2.14568	2	975.554	3.3371	87.206	0
	High	KLEDGPK	1	2	1	P68104		0	0.008	0.03323	1.85258	2	786.435	-0.525202	17.9196	1
P26038	Moesin OS=Homo sapiens GN=MSN PE=1 SV=3 - [MOES_HUMAN]	32.6969	18.02	1	8	8	13	577	67.7778	6.40479
	A2	Sequence	# PSMs	# Proteins	# Protein Groups	Protein Group Accessions	Modifications	ΔCn	q-Value	PEP	XCorr	Charge	MH+ [Da]	ΔM [ppm]	RT [min]	# Missed Cleavages
	High	TAMSTPHVAEPAENEQDEQDENGAEASADLR	1	1	1	P26038		0	0	8.624e-10	5.33567	3	3312.43	2.70455	79.9644	0
	High	APDFVFYAPR	2	1	1	P26038		0	0	0.0002068	2.97406	2	1182.59	0.528441	119.67	0
	High	TANDMIHAENMR	2	1	1	P26038		0	0	0.001252	2.27292	2	1402.62	1.57763	63.8703	0
	High	ISQLEMAR	2	1	1	P26038		0	0.001	0.005435	2.57206	2	947.497	-0.794043	65.6699	0
	High	ALTSELANAR	2	1	1	P26038		0	0.004	0.01517	2.12829	2	1045.56	-0.519672	70.4329	0
	High	SGYLAGDK	1	1	1	P26038		0	0.005	0.02009	2.32092	2	810.398	-1.23438	42.1755	0
	High	ERQEAEEAKEALLQASR	1	1	1	P26038		0	0.005	0.02002	2.29043	3	1957.99	-1.24265	87.6917	2
	High	ALELEQER	2	1	1	P26038		0	0.005	0.0197	1.80312	2	987.511	0.685326	64.3038	0
P60174	Triosephosphate isomerase OS=Homo sapiens GN=TPI1 PE=1 SV=3 - [TPIS_HUMAN]	32.1323	30.42	1	7	7	15	286	30.7717	5.92236
	A2	Sequence	# PSMs	# Proteins	# Protein Groups	Protein Group Accessions	Modifications	ΔCn	q-Value	PEP	XCorr	Charge	MH+ [Da]	ΔM [ppm]	RT [min]	# Missed Cleavages
	High	SNVSDAVAQSTR	2	1	1	P60174		0	0	5.08e-06	3.25155	2	1234.6	0.255435	53.6034	0
	High	VVLAYEPVWAIGTGK	2	1	1	P60174		0	0	2.105e-05	3.1715	2	1602.89	-0.834986	134.324	0
	High	TATPQQAQEVHEK	2	1	1	P60174		0	0	0.0009042	2.86044	2	1466.73	1.73751	29.5471	0
	High	HVFGESDELIGQK	4	1	1	P60174		0	0	0.0001945	2.80872	3	1458.72	1.70448	81.424	0
	High	IAVAAQNcYK	2	1	1	P60174	C8(Carbamidomethyl)	0	0	0.001935	2.62547	2	1137.57	0.0403082	54.1352	0
	High	IIYGGSVTGATcK	2	1	1	P60174	C12(Carbamidomethyl)	0	0.003	0.01407	2.02469	2	1326.67	0.293758	68.1724	0
	High	LDEREAGITEK	1	1	1	P60174		0	0.007	0.0266	1.79376	3	1260.64	-0.258943	47.7288	1
P23284	Peptidyl-prolyl cis-trans isomerase B OS=Homo sapiens GN=PPIB PE=1 SV=2 - [PPIB_HUMAN]	32.0925	31.94	1	7	7	13	216	23.7275	9.40771
	A2	Sequence	# PSMs	# Proteins	# Protein Groups	Protein Group Accessions	Modifications	ΔCn	q-Value	PEP	XCorr	Charge	MH+ [Da]	ΔM [ppm]	RT [min]	# Missed Cleavages
	High	DTNGSQFFITTVK	2	1	1	P23284		0	0	0.0001429	2.95202	2	1457.72	-2.79288	110.479	0
	High	VIKDFMIQGGDFTR	2	1	1	P23284		0	0	1.868e-05	2.59067	2	1626.83	-0.270074	110.188	1
	High	VLEGMEVVR	2	1	1	P23284		0	0	0.0003685	2.43585	2	1031.56	-0.348978	85.4576	0
	High	TVDNFVALATGEK	2	1	1	P23284		0	0.001	0.005363	3.18161	2	1364.71	0.0328095	117.568	0
	High	IGDEDVGR	2	1	1	P23284		0	0.001	0.003842	2.30857	2	860.411	-0.089608	37.3476	0
	High	IEVEKPFAIAKE	2	1	1	P23284		0	0.001	0.003798	1.86045	2	1373.77	3.14964	87.9775	1
	High	DFMIQGGDFTR	1	1	1	P23284		0	0.003	0.01208	2.00836	2	1286.58	1.00506	111.022	0
P67809	Nuclease-sensitive element-binding protein 1 OS=Homo sapiens GN=YBX1 PE=1 SV=3 - [YBOX1_HUMAN]	30.9571	37.65	1	6	6	14	324	35.9027	9.87646
	A2	Sequence	# PSMs	# Proteins	# Protein Groups	Protein Group Accessions	Modifications	ΔCn	q-Value	PEP	XCorr	Charge	MH+ [Da]	ΔM [ppm]	RT [min]	# Missed Cleavages
	High	NYQQNYQNSESGEKNEGSESAPEGQAQQR	2	1	1	P67809		0	0	2.197e-10	4.06078	3	3257.4	2.18094	49.0749	1
	High	RPQYSNPPVQGEVMEGADNQGAGEQGRPVR	5	1	1	P67809		0	0	0.0003393	3.8002	4	3223.53	1.21695	74.0597	0
	High	RPQYSNPPVQGEVmEGADNQGAGEQGRPVR	1	1	1	P67809	M14(Oxidation)	0	0	7.576e-08	3.00232	4	3239.53	1.42408	66.3629	0
	High	GAEAANVTGPGGVPVQGSK	2	1	1	P67809		0	0	4.112e-06	2.84999	2	1695.87	0.213093	60.7106	0
	High	AADPPAENSSAPEAEQGGAE	1	1	1	P67809		0	0	0.003039	1.81912	2	1897.81	0.387933	48.644	0
	High	EDGNEEDKENQGDETQGQQPPQR	2	1	1	P67809		0	0	0.0005621	1.73536	3	2628.11	1.1105	35.1372	1
	High	EDGNEEDKENQGDETQGQQPPQRR	1	1	1	P67809		0	0.005	0.01918	1.85953	3	2784.21	-0.0862213	29.8498	2
O60664	Perilipin-3 OS=Homo sapiens GN=PLIN3 PE=1 SV=3 - [PLIN3_HUMAN]	29.9264	21.89	1	6	6	12	434	47.0459	5.43994
	A2	Sequence	# PSMs	# Proteins	# Protein Groups	Protein Group Accessions	Modifications	ΔCn	q-Value	PEP	XCorr	Charge	MH+ [Da]	ΔM [ppm]	RT [min]	# Missed Cleavages
	High	SVVTGGVQSVMGSR	2	1	1	O60664		0	0	1.519e-07	3.38483	2	1363.7	0.519045	87.6573	0
	High	TLTAAAVSGAQPILSK	2	1	1	O60664		0	0	0.0001147	3.22939	2	1527.88	2.97694	92.5707	0
	High	SEEWADNHLPLTDAELAR	4	1	1	O60664		0	0	0.0001116	2.89783	3	2066.98	0.505418	112.153	0
	High	IATSLDGFDVASVQQQR	2	1	1	O60664		0	0	1.079e-05	2.75995	2	1834.93	1.88433	109.883	0
	High	VSGAQEMVSSAK	1	1	1	O60664		0	0	0.0003176	2.12251	2	1193.58	1.36823	54.8823	0
	High	QLQGPEKEPPKPEQVESR	1	1	1	O60664		0	0	0.001299	1.86382	3	2076.08	1.41375	49.5877	1
Q14764	Major vault protein OS=Homo sapiens GN=MVP PE=1 SV=4 - [MVP_HUMAN]	29.3785	9.41	1	6	6	12	893	99.2659	5.47803
	A2	Sequence	# PSMs	# Proteins	# Protein Groups	Protein Group Accessions	Modifications	ΔCn	q-Value	PEP	XCorr	Charge	MH+ [Da]	ΔM [ppm]	RT [min]	# Missed Cleavages
	High	VASGPSPGEGISPQSAQAPQAPGDNHVVPVLR	2	1	1	Q14764		0	0	2.065e-07	3.90033	3	3119.59	1.48629	93.713	0
	High	VPHNAAVQVYDYR	3	1	1	Q14764		0	0	0.0004712	2.76567	3	1531.77	0.39233	75.4299	0
	High	RVASGPSPGEGISPQSAQAPQAPGDNHVVPVLR	1	1	1	Q14764		0	0.001	0.004795	2.85324	4	3275.69	1.93773	90.431	1
	High	QAIPLDENEGIYVQDVK	2	1	1	Q14764		0	0.001	0.003966	2.18035	2	1930.98	1.08727	106.13	0
	High	IEGEGSVLQAK	2	1	1	Q14764		0	0.002	0.01033	2.21974	2	1130.61	0.78312	61.9098	0
	High	GPLEYVPSAK	2	1	1	Q14764		0	0.004	0.01676	2.41277	2	1060.57	-0.0687925	86.1742	0
P02533	Keratin, type I cytoskeletal 14 OS=Homo sapiens GN=KRT14 PE=1 SV=4 - [K1C14_HUMAN]	28.267	15.04	1	4	6	14	472	51.5294	5.16064
	A2	Sequence	# PSMs	# Proteins	# Protein Groups	Protein Group Accessions	Modifications	ΔCn	q-Value	PEP	XCorr	Charge	MH+ [Da]	ΔM [ppm]	RT [min]	# Missed Cleavages
	High	LLEGEDAHLSSSQFSSGSQSSR	2	1	1	P02533		0	0	0.000456	2.98679	3	2309.06	-0.392263	80.276	0
	High	VLDELTLAR	2	1	1	P02533		0	0	0.0003221	2.11572	2	1029.59	-0.139571	98.0944	0
	High	VTMQNLNDR	4	2	2	P13645;P02533		0	0.001	0.003914	1.98655	2	1090.53	-3.66443	59.2549	0
	High	LEQEIATYR	3	1	1	P02533		0	0.003	0.01389	2.54854	2	1122.58	0.457938	68.6655	0
	High	APSTYGGGLSVSSSR	2	1	1	P02533		0	0.003	0.0134	2.40828	2	1425.7	0.888278	68.0118	0
	High	LAADDFR	1	2	2	P13645;P02533		0	0.008	0.02722	2.23032	2	807.398	-2.05044	66.4784	0
P63104	14-3-3 protein zeta/delta OS=Homo sapiens GN=YWHAZ PE=1 SV=1 - [1433Z_HUMAN]	28.0431	21.22	1	4	6	12	245	27.7277	4.79248
	A2	Sequence	# PSMs	# Proteins	# Protein Groups	Protein Group Accessions	Modifications	ΔCn	q-Value	PEP	XCorr	Charge	MH+ [Da]	ΔM [ppm]	RT [min]	# Missed Cleavages
	High	SVTEQGAELSNEER	4	1	1	P63104		0	0	2.573e-07	3.65	2	1548.72	0.853688	57.6615	0
	High	YLAEVAAGDDKK	3	1	1	P63104		0	0	0.001277	2.85856	2	1279.65	0.0628298	52.1079	1
	High	DSTLIMQLLR	1	4	4	P62258;P61981;P27348;P63104		0	0	0.001108	2.22551	2	1189.66	-2.09004	139.401	0
	High	LAEQAERYDDMAAcMK	1	1	1	P63104	C14(Carbamidomethyl)	0	0.001	0.00336	2.51167	3	1901.82	-0.614685	84.7693	1
	High	LAEQAER	2	4	4	P62258;P61981;P27348;P63104		0	0.004	0.01598	2.35383	2	816.421	0.469142	23.3666	0
	High	YDDMAAcMK	1	1	1	P63104	C7(Carbamidomethyl)	0	0.005	0.01819	1.85018	2	1104.41	-1.09094	66.5228	0
O43707	Alpha-actinin-4 OS=Homo sapiens GN=ACTN4 PE=1 SV=2 - [ACTN4_HUMAN]	26.4234	14.38	1	10	10	13	911	104.788	5.43994
	A2	Sequence	# PSMs	# Proteins	# Protein Groups	Protein Group Accessions	Modifications	ΔCn	q-Value	PEP	XCorr	Charge	MH+ [Da]	ΔM [ppm]	RT [min]	# Missed Cleavages
	High	TINEVENQILTR	2	1	1	O43707		0	0	1.201e-06	3.70185	2	1429.77	4.76902	101.356	0
	High	LSGSNPYTTVTPQIINSK	2	1	1	O43707		0	0	0.0002811	2.56335	2	1920.01	0.969564	98.6944	0
	High	ETTDTDTADQVIASFK	1	1	1	O43707		0	0	0.0004147	2.2323	2	1741.81	-3.96575	118.962	0
	High	MAPYQGPDAVPGALDYK	2	1	1	O43707		0	0	0.0003049	2.08105	2	1792.86	3.84646	103.82	0
	High	ALDFIASK	1	1	1	O43707		0	0.001	0.00465	2.03127	2	864.483	0.776916	88.6689	0
	High	GISQEQMQEFR	1	1	1	O43707		0	0.002	0.009273	2.48192	2	1352.62	-6.4985	83.3628	0
	High	HTNYTMEHIR	1	1	1	O43707		0	0.002	0.00971	2.40829	3	1301.61	0.424056	60.1781	0
	High	TIQEMQQK	1	1	1	O43707		0	0.008	0.03077	1.89666	2	1005.5	-1.33221	37.2741	0
	High	VLAVNQENEHLMEDYEK	1	1	1	O43707		0	0.008	0.03509	1.6457	3	2060.96	-1.65142	93.3629	0
	High	FAIQDISVEETSAK	1	1	1	O43707		0	0.009	0.03836	2.18379	2	1537.78	1.48246	106.028	0
P27797	Calreticulin OS=Homo sapiens GN=CALR PE=1 SV=1 - [CALR_HUMAN]	26.3149	22.06	1	6	6	13	417	48.1118	4.43701
	A2	Sequence	# PSMs	# Proteins	# Protein Groups	Protein Group Accessions	Modifications	ΔCn	q-Value	PEP	XCorr	Charge	MH+ [Da]	ΔM [ppm]	RT [min]	# Missed Cleavages
	High	AKIDDPTDSKPEDWDKPEHIPDPDAK	4	1	1	P27797		0	0	0.0001076	2.85148	4	2959.39	-1.02061	98.1255	1
	High	EQFLDGDGWTSR	2	1	1	P27797		0	0	0.0006878	2.62245	2	1410.63	1.70539	105.653	0
	High	IKDPDASKPEDWDER	3	1	1	P27797		0	0	4.761e-06	2.42803	3	1800.84	-0.0574164	66.7131	1
	High	FYGDEEKDKGLQTSQDAR	1	1	1	P27797		0	0.001	0.003412	2.12847	3	2086.97	2.86332	60.704	2
	High	DKQDEEQR	2	1	1	P27797		0	0.003	0.01231	1.94735	2	1047.47	-0.0486198	11.0557	1
	High	HEQNIDcGGGYVK	1	1	1	P27797	C7(Carbamidomethyl)	0	0.005	0.0242	2.302	2	1476.66	1.04538	49.8066	0
P06576	ATP synthase subunit beta, mitochondrial OS=Homo sapiens GN=ATP5B PE=1 SV=3 - [ATPB_HUMAN]	24.181	11.34	1	4	4	9	529	56.5246	5.40186
	A2	Sequence	# PSMs	# Proteins	# Protein Groups	Protein Group Accessions	Modifications	ΔCn	q-Value	PEP	XCorr	Charge	MH+ [Da]	ΔM [ppm]	RT [min]	# Missed Cleavages
	High	FTQAGSEVSALLGR	2	1	1	P06576		0	0	1.463e-05	3.04364	2	1435.75	-0.656062	116.764	0
	High	VALVYGQMNEPPGAR	2	1	1	P06576		0	0	0.0001915	2.83179	2	1601.81	-2.85022	90.4572	0
	High	VLDSGAPIKIPVGPETLGR	3	1	1	P06576		0	0.001	0.006507	2.83182	3	1919.1	1.15184	111.416	1
	High	TIAMDGTEGLVR	2	1	1	P06576		0	0.003	0.01168	2.35884	2	1262.64	-2.47602	88.6874	0
P09493	Tropomyosin alpha-1 chain OS=Homo sapiens GN=TPM1 PE=1 SV=2 - [TPM1_HUMAN]	22.6197	19.37	1	2	6	12	284	32.6887	4.7417
	A2	Sequence	# PSMs	# Proteins	# Protein Groups	Protein Group Accessions	Modifications	ΔCn	q-Value	PEP	XCorr	Charge	MH+ [Da]	ΔM [ppm]	RT [min]	# Missed Cleavages
	High	KATDAEADVASLNR	2	1	1	P09493		0	0	1.965e-06	3.10186	2	1460.73	0.428168	66.1918	1
	High	LEEAEKAADESER	4	2	2	P09493;P67936		0	0	6.925e-05	3.00769	2	1476.68	0.3176	41.3145	1
	High	SKQLEDELVSLQK	1	1	1	P09493		0	0	0.0008575	2.36286	3	1516.82	0.905161	97.5852	1
	High	IQLVEEELDR	2	2	2	P09493;P67936		0	0	6.908e-05	2.03385	2	1243.66	2.71482	98.6815	0
	High	IQLVEEELDRAQER	2	2	2	P09493;P67936		0	0	0.001704	1.72941	3	1727.89	-0.019792	100.003	1
	High	RIQLVEEELDRAQER	1	2	2	P09493;P67936		0	0.008	0.03152	2.80652	3	1884	4.03951	99.1573	2
Q13085	Acetyl-CoA carboxylase 1 OS=Homo sapiens GN=ACACA PE=1 SV=2 - [ACACA_HUMAN]	21.986	4.65	1	8	8	13	2346	265.385	6.3667
	A2	Sequence	# PSMs	# Proteins	# Protein Groups	Protein Group Accessions	Modifications	ΔCn	q-Value	PEP	XCorr	Charge	MH+ [Da]	ΔM [ppm]	RT [min]	# Missed Cleavages
	High	VEVGTEVTDYR	2	1	1	Q13085		0	0	0.0001142	2.9693	2	1267.62	-0.688786	76.8885	0
	High	VQQAELHTGSLPR	2	1	1	Q13085		0	0	0.0003859	2.91711	2	1435.77	2.49701	62.0621	0
	High	QVQAEVPGSPIFVMR	1	1	1	Q13085		0	0	0.001721	2.39327	2	1657.87	0.787724	119.803	0
	High	ITSENPDEGFKPSSGTVQELNFR	3	1	1	Q13085		0	0	0.0001298	1.72682	3	2552.22	-0.684398	103.174	0
	High	IGLAEEIR	1	1	1	Q13085		0	0.001	0.005257	2.2205	2	900.514	-1.31124	83.9116	0
	High	LPGGNEIGMVAWK	1	1	1	Q13085		0	0.006	0.02544	2.2746	2	1371.71	-0.70415	117.624	0
	High	EASFEYLQNEGER	2	1	1	Q13085		0	0.006	0.02553	1.46929	2	1571.7	2.64829	92.2631	0
	High	GSVLEPEGTVEIK	1	1	1	Q13085		0	0.008	0.03385	2.06754	2	1357.72	0.257619	88.1964	0
Q05682	Caldesmon OS=Homo sapiens GN=CALD1 PE=1 SV=3 - [CALD1_HUMAN]	21.0447	11.48	1	6	6	12	793	93.1754	5.65576
	A2	Sequence	# PSMs	# Proteins	# Protein Groups	Protein Group Accessions	Modifications	ΔCn	q-Value	PEP	XCorr	Charge	MH+ [Da]	ΔM [ppm]	RT [min]	# Missed Cleavages
	High	LEQYTSAIEGTK	2	1	1	Q05682		0	0	0.0001936	3.19514	2	1339.67	0.248348	74.1488	0
	High	TPDGNKSPAPKPSDLRPGDVSSK	2	1	1	Q05682		0	0.001	0.006419	2.29504	3	2350.2	0.784192	60.1342	1
	High	NDDDEEEAAR	2	1	1	Q05682		0	0.001	0.006401	2.2725	2	1163.45	0.287644	24.8112	0
	High	SAKPTKPAASDLPVPAEGVR	2	1	1	Q05682		0	0.002	0.008246	2.3067	3	1991.09	-0.181462	73.0709	0
	High	VLEEEEQR	2	1	1	Q05682		0	0.003	0.01224	2.64409	2	1031.5	1.40315	36.9299	0
	High	QKEFDPTITDASLSLPSR	2	1	1	Q05682		0	0.005	0.02159	3.22734	3	2005.02	0.347584	106.797	1
P38646	Stress-70 protein, mitochondrial OS=Homo sapiens GN=HSPA9 PE=1 SV=2 - [GRP75_HUMAN]	20.6877	8.98	1	5	5	9	679	73.6348	6.16357
	A2	Sequence	# PSMs	# Proteins	# Protein Groups	Protein Group Accessions	Modifications	ΔCn	q-Value	PEP	XCorr	Charge	MH+ [Da]	ΔM [ppm]	RT [min]	# Missed Cleavages
	High	NAVITVPAYFNDSQR	2	1	1	P38646		0	0	0.002642	2.93719	2	1694.85	-1.76654	114.073	0
	High	TTPSVVAFTADGER	2	1	1	P38646		0	0	0.0002434	2.8622	2	1450.71	-2.09573	92.4024	0
	High	VLENAEGAR	1	1	1	P38646		0	0	0.002886	1.97501	2	958.495	-0.641417	35.2348	0
	High	VQQTVQDLFGR	2	1	1	P38646		0	0.002	0.01006	2.9093	2	1290.68	1.9629	103.636	0
	High	DAGQISGLNVLR	2	1	1	P38646		0	0.005	0.0243	2.63415	2	1242.68	-1.70212	103.009	0
P61981	14-3-3 protein gamma OS=Homo sapiens GN=YWHAG PE=1 SV=2 - [1433G_HUMAN]	20.3452	24.29	1	5	7	10	247	28.2849	4.89404
	A2	Sequence	# PSMs	# Proteins	# Protein Groups	Protein Group Accessions	Modifications	ΔCn	q-Value	PEP	XCorr	Charge	MH+ [Da]	ΔM [ppm]	RT [min]	# Missed Cleavages
	High	NVTELNEPLSNEER	2	1	1	P61981		0	0	2.671e-08	2.84668	2	1643.79	-0.986285	79.6869	0
	High	YLAEVATGEKR	2	1	1	P61981		0	0	0.001294	2.66598	2	1236.66	-0.854836	54.9374	1
	High	DSTLIMQLLR	1	4	4	P62258;P61981;P27348;P63104		0	0	0.001108	2.22551	2	1189.66	-2.09004	139.401	0
	High	YDDMAAAMK	1	1	1	P61981		0	0	0.002547	2.09469	2	1015.42	-0.762124	67.7769	0
	High	LAEQAERYDDMAAAMK	1	1	1	P61981		0	0.001	0.005795	1.36075	2	1812.83	0.812359	87.5916	1
	High	LAEQAER	2	4	4	P62258;P61981;P27348;P63104		0	0.004	0.01598	2.35383	2	816.421	0.469142	23.3666	0
	High	ATVVESSEK	1	1	1	P61981		0	0.006	0.02504	1.65715	2	949.486	2.61333	24.6855	0
P34931	Heat shock 70 kDa protein 1-like OS=Homo sapiens GN=HSPA1L PE=1 SV=2 - [HS71L_HUMAN]	19.8489	10.45	1	2	5	10	641	70.3313	6.02393
	A2	Sequence	# PSMs	# Proteins	# Protein Groups	Protein Group Accessions	Modifications	ΔCn	q-Value	PEP	XCorr	Charge	MH+ [Da]	ΔM [ppm]	RT [min]	# Missed Cleavages
	High	VEIIANDQGNR	4	3	3	P11021;P34931;P11142		0	0	8.743e-05	2.60628	2	1228.63	1.19068	55.1643	0
	High	IINEPTAAAIAYGLDK	1	3	3	P11021;P34931;P11142		0	0	9.368e-05	2.43602	2	1659.89	-4.40045	119.975	0
	High	TTPSYVAFTDTER	2	2	2	P34931;P11142		0	0	0.001273	2.06231	2	1487.7	0.512647	93.1633	0
	High	NALESYAFNMK	2	1	1	P34931		0	0.001	0.005922	2.14552	2	1287.6	-0.887361	112.201	0
	High	ATAGDTHLGGEDFDNR	1	1	1	P34931		0	0.005	0.02138	2.00788	3	1675.73	1.92788	64.7676	0
P15121	Aldose reductase OS=Homo sapiens GN=AKR1B1 PE=1 SV=3 - [ALDR_HUMAN]	19.3676	12.03	1	4	4	9	316	35.8305	6.97607
	A2	Sequence	# PSMs	# Proteins	# Protein Groups	Protein Group Accessions	Modifications	ΔCn	q-Value	PEP	XCorr	Charge	MH+ [Da]	ΔM [ppm]	RT [min]	# Missed Cleavages
	High	SPPGQVTEAVK	3	1	1	P15121		0	0	1.584e-05	2.52193	2	1112.59	-0.0172651	49.1494	0
	High	MPILGLGTWK	2	1	1	P15121		0	0	0.000225	2.35774	2	1115.63	-0.227687	133.389	0
	High	VAIDVGYR	2	1	1	P15121		0	0.001	0.007488	1.75192	2	892.488	-0.382544	77.8785	0
	High	REELFIVSK	2	1	1	P15121		0	0.002	0.009597	2.673	3	1120.64	2.75158	86.6208	1
P37802	Transgelin-2 OS=Homo sapiens GN=TAGLN2 PE=1 SV=3 - [TAGL2_HUMAN]	18.4433	21.61	1	4	4	7	199	22.3772	8.25049
	A2	Sequence	# PSMs	# Proteins	# Protein Groups	Protein Group Accessions	Modifications	ΔCn	q-Value	PEP	XCorr	Charge	MH+ [Da]	ΔM [ppm]	RT [min]	# Missed Cleavages
	High	GASQAGMTGYGMPR	2	1	1	P37802		0	0	7.838e-08	3.821	2	1383.61	-0.289119	76.1038	0
	High	NVIGLQMGTNR	2	1	1	P37802		0	0	0.0002081	3.15854	2	1202.63	-1.15998	87.6229	0
	High	NFSDNQLQEGK	2	1	1	P37802		0	0	0.002285	2.09481	2	1279.59	-0.870388	60.6496	0
	High	NMAcVQR	1	1	1	P37802	C4(Carbamidomethyl)	0	0.007	0.02638	1.78872	2	878.398	0.80766	35.2317	0
P30101	Protein disulfide-isomerase A3 OS=Homo sapiens GN=PDIA3 PE=1 SV=4 - [PDIA3_HUMAN]	18.0973	13.07	1	5	5	9	505	56.7468	6.354
	A2	Sequence	# PSMs	# Proteins	# Protein Groups	Protein Group Accessions	Modifications	ΔCn	q-Value	PEP	XCorr	Charge	MH+ [Da]	ΔM [ppm]	RT [min]	# Missed Cleavages
	High	IFRDGEEAGAYDGPR	2	1	1	P30101		0	0	0.002084	2.99734	3	1652.76	-1.15674	69.0908	1
	High	LAPEYEAAATR	2	1	1	P30101		0	0.001	0.005942	1.86804	2	1191.6	0.332642	62.2106	0
	High	MDATANDVPSPYEVR	2	1	1	P30101		0	0.002	0.01068	2.46776	2	1664.76	0.837354	86.381	0
	High	EATNPPVIQEEKPK	1	1	1	P30101		0	0.002	0.01054	1.77724	2	1579.84	1.93036	49.952	0
	High	LSKDPNIVIAK	2	1	1	P30101		0	0.003	0.01304	1.89487	3	1197.72	0.235311	61.631	1
P80723	Brain acid soluble protein 1 OS=Homo sapiens GN=BASP1 PE=1 SV=2 - [BASP1_HUMAN]	17.7746	44.93	1	5	5	11	227	22.68	4.62744
	A2	Sequence	# PSMs	# Proteins	# Protein Groups	Protein Group Accessions	Modifications	ΔCn	q-Value	PEP	XCorr	Charge	MH+ [Da]	ΔM [ppm]	RT [min]	# Missed Cleavages
	High	AEPPKAPEQEQAAPGPAAGGEAPK	3	1	1	P80723		0	0	2.131e-08	3.22083	3	2298.14	1.19178	49.3291	1
	High	KTEAPAAPAAQETK	2	1	1	P80723		0	0	0.0006931	2.55869	2	1412.74	0.794231	29.7136	1
	High	AQGPAASAEEPKPVEAPAANSDQTVTVKE	4	1	1	P80723		0	0	0.000136	2.50911	3	2892.43	1.49271	69.8028	1
	High	ETPAATEAPSSTPK	1	1	1	P80723		0	0.005	0.02414	1.39053	2	1386.67	0.139223	39.4548	0
	High	SDGAPASDSKPGSSEAAPSSK	1	1	1	P80723		0	0.008	0.03483	1.54179	2	1932.88	1.45262	28.8311	0
Q9Y490	Talin-1 OS=Homo sapiens GN=TLN1 PE=1 SV=3 - [TLN1_HUMAN]	17.7269	3.23	1	5	5	8	2541	269.599	6.07471
	A2	Sequence	# PSMs	# Proteins	# Protein Groups	Protein Group Accessions	Modifications	ΔCn	q-Value	PEP	XCorr	Charge	MH+ [Da]	ΔM [ppm]	RT [min]	# Missed Cleavages
	High	LAQAAQSSVATITR	2	1	1	Q9Y490		0	0	9.238e-10	4.24393	2	1416.78	1.62566	67.8914	0
	High	TMLESAGGLIQTAR	2	1	1	Q9Y490		0	0	0.0003442	3.18491	2	1447.76	3.25417	106.302	0
	High	VLVQNAAGSQEK	1	1	1	Q9Y490		0	0.002	0.009227	2.03128	2	1243.67	1.34102	40.896	0
	High	SGASGPENFQVGSMPPAQQQITSGQMHR	2	1	1	Q9Y490		0	0.005	0.02435	2.12865	3	2927.36	1.65051	93.4463	0
	High	AVAEQIPLLVQGVR	1	1	1	Q9Y490		0	0.006	0.02527	1.43972	2	1492.89	1.97573	123.788	0
O75369	Filamin-B OS=Homo sapiens GN=FLNB PE=1 SV=2 - [FLNB_HUMAN]	17.4589	2.57	1	4	5	8	2602	277.99	5.73193
	A2	Sequence	# PSMs	# Proteins	# Protein Groups	Protein Group Accessions	Modifications	ΔCn	q-Value	PEP	XCorr	Charge	MH+ [Da]	ΔM [ppm]	RT [min]	# Missed Cleavages
	High	TFEMSDFIVDTR	1	1	1	O75369		0	0	4.082e-06	3.15261	2	1460.67	-2.943	133.396	0
	High	SPFEVQVGPEAGMQK	2	1	1	O75369		0	0	0.002421	2.77946	2	1603.78	0.183874	98.5812	0
	High	GAGIGGLGITVEGPSESK	2	1	1	O75369		0	0.001	0.004598	2.22874	2	1628.85	1.84613	105.401	0
	High	IQQNTFTR	2	3	3	P21333;O75369;Q14315		0	0.001	0.005538	1.80602	2	1007.53	0.486388	48.8695	0
	High	VEVGKDQEFTVDTR	1	1	1	O75369		0	0.002	0.007767	2.07131	3	1622.8	-0.50383	74.3303	1
O43175	D-3-phosphoglycerate dehydrogenase OS=Homo sapiens GN=PHGDH PE=1 SV=4 - [SERA_HUMAN]	17.1346	7.13	1	3	3	6	533	56.6144	6.7124
	A2	Sequence	# PSMs	# Proteins	# Protein Groups	Protein Group Accessions	Modifications	ΔCn	q-Value	PEP	XCorr	Charge	MH+ [Da]	ΔM [ppm]	RT [min]	# Missed Cleavages
	High	AGTGVDNVDLEAATR	2	1	1	O43175		0	0	2.125e-05	3.37212	2	1488.73	0.306581	80.5431	0
	High	ILQDGGLQVVEK	2	1	1	O43175		0	0	0.0001424	3.16896	2	1298.73	-0.578111	84.8004	0
	High	GGIVDEGALLR	2	1	1	O43175		0	0	9.996e-05	3.07514	2	1099.61	1.30668	99.0033	0
P13639	Elongation factor 2 OS=Homo sapiens GN=EEF2 PE=1 SV=4 - [EF2_HUMAN]	16.7683	6.99	1	5	5	7	858	95.277	6.82959
	A2	Sequence	# PSMs	# Proteins	# Protein Groups	Protein Group Accessions	Modifications	ΔCn	q-Value	PEP	XCorr	Charge	MH+ [Da]	ΔM [ppm]	RT [min]	# Missed Cleavages
	High	ARPFPDGLAEDIDKGEVSAR	3	1	1	P13639		0	0	0.0004826	2.79561	3	2143.08	-1.04222	110.064	1
	High	VFSGLVSTGLK	1	1	1	P13639		0	0.001	0.004585	2.48192	2	1107.64	-1.96077	100.738	0
	High	EGALcEENMR	1	1	1	P13639	C5(Carbamidomethyl)	0	0.001	0.006104	1.78678	2	1208.5	0.068132	57.7453	0
	High	VFDAIMNFK	1	1	1	P13639		0	0.005	0.01802	1.94666	2	1084.55	-0.143124	123.887	0
	High	IMGPNYTPGK	1	1	1	P13639		0	0.008	0.03614	1.97003	2	1077.54	-1.3119	65.2092	0
O00469	Procollagen-lysine,2-oxoglutarate 5-dioxygenase 2 OS=Homo sapiens GN=PLOD2 PE=1 SV=2 - [PLOD2_HUMAN]	16.7176	5.29	1	3	3	8	737	84.6316	6.7124
	A2	Sequence	# PSMs	# Proteins	# Protein Groups	Protein Group Accessions	Modifications	ΔCn	q-Value	PEP	XCorr	Charge	MH+ [Da]	ΔM [ppm]	RT [min]	# Missed Cleavages
	High	SEDYVDIVQGNR	2	1	1	O00469		0	0	0.000568	3.43172	2	1394.65	-0.168326	90.9376	0
	High	IVGPEENLSQAEAR	4	1	1	O00469		0	0	0.0001924	2.60306	2	1512.77	0.219002	77.61	0
	High	GGDGINSIGGGQK	2	1	1	O00469		0	0	0.002636	2.42689	2	1159.57	0.0852029	49.4154	0
P23396	40S ribosomal protein S3 OS=Homo sapiens GN=RPS3 PE=1 SV=2 - [RS3_HUMAN]	16.64	20.99	1	4	4	7	243	26.6714	9.65674
	A2	Sequence	# PSMs	# Proteins	# Protein Groups	Protein Group Accessions	Modifications	ΔCn	q-Value	PEP	XCorr	Charge	MH+ [Da]	ΔM [ppm]	RT [min]	# Missed Cleavages
	High	AELNEFLTR	2	1	1	P23396		0	0	0.001113	2.95012	2	1092.57	0.406341	103.992	0
	High	ELAEDGYSGVEVR	2	1	1	P23396		0	0	5.628e-06	2.59491	2	1423.67	0.642519	79.8972	0
	High	GGKPEPPAMPQPVPTA	2	1	1	P23396		0	0.005	0.02146	2.34666	2	1573.8	-0.0918046	80.9976	0
	High	DEILPTTPISEQK	1	1	1	P23396		0	0.007	0.02579	1.81718	2	1470.77	-1.29869	90.1281	0
P18669	Phosphoglycerate mutase 1 OS=Homo sapiens GN=PGAM1 PE=1 SV=2 - [PGAM1_HUMAN]	16.4006	23.62	1	5	5	7	254	28.7858	7.18115
	A2	Sequence	# PSMs	# Proteins	# Protein Groups	Protein Group Accessions	Modifications	ΔCn	q-Value	PEP	XCorr	Charge	MH+ [Da]	ΔM [ppm]	RT [min]	# Missed Cleavages
	High	HGESAWNLENR	2	1	1	P18669		0	0	0.000227	3.56491	2	1312.6	0.380811	73.8726	0
	High	AMEAVAAQGK	2	1	1	P18669		0	0	0.002894	2.04003	2	975.491	-1.51789	36.6289	0
	High	VLIAAHGNSLR	1	1	1	P18669		0	0.001	0.005102	2.41098	2	1150.67	-0.0489441	59.5152	0
	High	FSGWYDADLSPAGHEEAK	1	1	1	P18669		0	0.003	0.01129	2.20618	3	1979.88	2.14128	106.137	0
	High	HYGGLTGLNK	1	1	1	P18669		0	0.009	0.0393	2.13652	2	1059.56	0.64573	59.7565	0
Q7KZF4	Staphylococcal nuclease domain-containing protein 1 OS=Homo sapiens GN=SND1 PE=1 SV=1 - [SND1_HUMAN]	15.757	6.37	1	4	4	6	910	101.934	7.1665
	A2	Sequence	# PSMs	# Proteins	# Protein Groups	Protein Group Accessions	Modifications	ΔCn	q-Value	PEP	XCorr	Charge	MH+ [Da]	ΔM [ppm]	RT [min]	# Missed Cleavages
	High	VITEYLNAQESAK	2	1	1	Q7KZF4		0	0	0.00181	3.2063	2	1465.76	2.5764	85.1305	0
	High	SEAVVEYVFSGSR	1	1	1	Q7KZF4		0	0	4.977e-06	3.07722	2	1429.69	-0.934251	118.228	0
	High	NDIASHPPVEGSYAPR	2	1	1	Q7KZF4		0	0	0.0008541	2.1565	3	1709.83	1.25617	66.9025	0
	High	EADGSETPEPFAAEAK	1	1	1	Q7KZF4		0	0	0.000142	2.08809	2	1648.74	1.27743	78.3011	0
O15460	Prolyl 4-hydroxylase subunit alpha-2 OS=Homo sapiens GN=P4HA2 PE=1 SV=1 - [P4HA2_HUMAN]	15.7569	12.15	1	5	5	9	535	60.8636	5.70654
	A2	Sequence	# PSMs	# Proteins	# Protein Groups	Protein Group Accessions	Modifications	ΔCn	q-Value	PEP	XCorr	Charge	MH+ [Da]	ΔM [ppm]	RT [min]	# Missed Cleavages
	High	SSWLEEDDDPVVAR	2	1	1	O15460		0	0	5.666e-07	3.87724	2	1617.75	3.76793	106.205	0
	High	TGVLTVASYR	2	1	1	O15460		0	0	0.002611	2.88781	2	1066.59	-1.38499	86.48	0
	High	YYDVMSDEEIER	2	1	1	O15460		0	0	2.472e-06	1.64785	2	1548.65	1.22758	98.424	0
	High	SAADAEGYLAHPVNAYK	2	1	1	O15460		0	0.004	0.016	1.97828	3	1776.86	0.135389	86.6488	0
	High	QLDAGEEATTTK	1	1	1	O15460		0	0.009	0.03819	1.05778	2	1263.61	0.490574	40.5853	0
P07195	L-lactate dehydrogenase B chain OS=Homo sapiens GN=LDHB PE=1 SV=2 - [LDHB_HUMAN]	15.4806	18.56	1	4	5	9	334	36.6151	6.04932
	A2	Sequence	# PSMs	# Proteins	# Protein Groups	Protein Group Accessions	Modifications	ΔCn	q-Value	PEP	XCorr	Charge	MH+ [Da]	ΔM [ppm]	RT [min]	# Missed Cleavages
	High	IVADKDYSVTANSK	1	1	1	P07195		0	0	7.095e-07	2.82108	2	1510.78	0.489149	52.676	1
	High	MVVESAYEVIK	1	1	1	P07195		0	0	0.0006303	2.68189	2	1267.66	1.74485	100.438	0
	High	LIAPVAEEEATVPNNK	2	1	1	P07195		0	0	8.292e-05	2.49231	2	1694.9	-0.496845	85.1467	0
	High	VIGSGcNLDSAR	4	2	2	P00338;P07195	C6(Carbamidomethyl)	0	0	0.001824	1.63557	2	1248.6	0.269234	57.0462	0
	High	GLTSVINQK	1	1	1	P07195		0	0.004	0.01631	2.01179	2	959.554	1.83238	68.5218	0
P62937	Peptidyl-prolyl cis-trans isomerase A OS=Homo sapiens GN=PPIA PE=1 SV=2 - [PPIA_HUMAN]	15.3073	32.73	1	5	5	7	165	18.0009	7.81104
	A2	Sequence	# PSMs	# Proteins	# Protein Groups	Protein Group Accessions	Modifications	ΔCn	q-Value	PEP	XCorr	Charge	MH+ [Da]	ΔM [ppm]	RT [min]	# Missed Cleavages
	High	VKEGMNIVEAMER	3	1	1	P62937		0	0	1.687e-05	3.53984	2	1505.75	2.59654	103.509	1
	High	IIPGFMcQGGDFTR	1	1	1	P62937	C7(Carbamidomethyl)	0	0.001	0.006575	1.73368	2	1598.75	0.333998	118.215	0
	High	SIYGEKFEDENFILK	1	1	1	P62937		0	0.003	0.01476	1.39079	2	1831.91	-0.48218	118.557	1
	High	VSFELFADKVPK	1	1	1	P62937		0	0.005	0.02115	2.13504	2	1379.76	-0.262296	120.036	1
	High	EGMNIVEAMER	1	1	1	P62937		0	0.009	0.03933	1.81028	2	1278.58	-0.0458807	115.088	0
Q14103	Heterogeneous nuclear ribonucleoprotein D0 OS=Homo sapiens GN=HNRNPD PE=1 SV=1 - [HNRPD_HUMAN]	15.0894	11.83	1	2	3	6	355	38.4103	7.81104
	A2	Sequence	# PSMs	# Proteins	# Protein Groups	Protein Group Accessions	Modifications	ΔCn	q-Value	PEP	XCorr	Charge	MH+ [Da]	ΔM [ppm]	RT [min]	# Missed Cleavages
	High	IFVGGLSPDTPEEK	2	1	1	Q14103		0	0	7.533e-08	2.95635	2	1488.76	1.04775	94.5271	0
	High	IDASKNEEDEGHSNSSPR	2	1	1	Q14103		0	0	0.0004613	2.77326	3	1971.86	-0.786782	27.9514	1
	High	FGEVVDcTLK	2	2	2	Q99729;Q14103	C7(Carbamidomethyl)	0	0.005	0.01929	2.19542	2	1167.57	-0.972277	85.4094	0
P35613	Basigin OS=Homo sapiens GN=BSG PE=1 SV=2 - [BASI_HUMAN]	14.7982	7.01	1	2	2	6	385	42.1741	5.65576
	A2	Sequence	# PSMs	# Proteins	# Protein Groups	Protein Group Accessions	Modifications	ΔCn	q-Value	PEP	XCorr	Charge	MH+ [Da]	ΔM [ppm]	RT [min]	# Missed Cleavages
	High	SELHIENLNMEADPGQYR	4	1	1	P35613		0	0	1.221e-06	3.68459	3	2115.98	0.948706	104.024	0
	High	FFVSSSQGR	2	1	1	P35613		0	0.003	0.01167	2.18314	2	1014.5	-0.0685664	66.7867	0
P62258	14-3-3 protein epsilon OS=Homo sapiens GN=YWHAE PE=1 SV=1 - [1433E_HUMAN]	14.6701	10.59	1	2	4	7	255	29.1554	4.7417
	A2	Sequence	# PSMs	# Proteins	# Protein Groups	Protein Group Accessions	Modifications	ΔCn	q-Value	PEP	XCorr	Charge	MH+ [Da]	ΔM [ppm]	RT [min]	# Missed Cleavages
	High	LAEQAERYDEMVESMKK	2	1	1	P62258		0	0	0.0001053	2.82472	3	2056.97	0.394667	97.8664	2
	High	DSTLIMQLLR	1	4	4	P62258;P61981;P27348;P63104		0	0	0.001108	2.22551	2	1189.66	-2.09004	139.401	0
	High	LAEQAERYDEMVESMK	2	1	1	P62258		0	0.003	0.01337	2.53256	3	1928.87	-1.44642	104.228	1
	High	LAEQAER	2	4	4	P62258;P61981;P27348;P63104		0	0.004	0.01598	2.35383	2	816.421	0.469142	23.3666	0
P46821	Microtubule-associated protein 1B OS=Homo sapiens GN=MAP1B PE=1 SV=2 - [MAP1B_HUMAN]	14.6561	1.7	1	3	3	5	2468	270.468	4.80518
	A2	Sequence	# PSMs	# Proteins	# Protein Groups	Protein Group Accessions	Modifications	ΔCn	q-Value	PEP	XCorr	Charge	MH+ [Da]	ΔM [ppm]	RT [min]	# Missed Cleavages
	High	SSYYVVSGNDPAAEEPSR	2	1	1	P46821		0	0	1.227e-06	3.87376	2	1927.88	8.09312	80.494	0
	High	SVGNTIDPVILFQK	2	1	1	P46821		0	0	4.214e-05	3.15152	2	1530.85	-3.57693	131.143	0
	High	AVLDALLEGK	1	1	1	P46821		0	0.005	0.02154	2.13548	2	1028.59	-4.41135	119.978	0
P10809	60 kDa heat shock protein, mitochondrial OS=Homo sapiens GN=HSPD1 PE=1 SV=2 - [CH60_HUMAN]	14.6101	11.52	1	5	5	6	573	61.0164	5.87158
	A2	Sequence	# PSMs	# Proteins	# Protein Groups	Protein Group Accessions	Modifications	ΔCn	q-Value	PEP	XCorr	Charge	MH+ [Da]	ΔM [ppm]	RT [min]	# Missed Cleavages
	High	LVQDVANNTNEEAGDGTTTATVLAR	1	1	1	P10809		0	0	2.332e-05	3.65847	3	2560.25	2.25657	85.2863	0
	High	VTDALNATR	2	1	1	P10809		0	0	0.0003061	2.46886	2	960.511	-0.147332	46.6008	0
	High	GYISPYFINTSK	1	1	1	P10809		0	0.005	0.02338	1.99622	2	1389.7	-1.52184	110.868	0
	High	APGFGDNR	1	1	1	P10809		0	0.008	0.03272	1.87698	2	833.39	0.258088	43.0778	0
	High	TVIIEQSWGSPK	1	1	1	P10809		0	0.009	0.03812	2.02407	2	1344.72	2.6449	96.075	0
Q9H0U4	Ras-related protein Rab-1B OS=Homo sapiens GN=RAB1B PE=1 SV=1 - [RAB1B_HUMAN]	13.8577	18.41	1	3	3	6	201	22.1572	5.73193
	A2	Sequence	# PSMs	# Proteins	# Protein Groups	Protein Group Accessions	Modifications	ΔCn	q-Value	PEP	XCorr	Charge	MH+ [Da]	ΔM [ppm]	RT [min]	# Missed Cleavages
	High	MGPGAASGGERPNLK	2	1	1	Q9H0U4		0	0	0.0001609	3.4587	2	1441.72	0.088822	49.5976	0
	High	LLLIGDSGVGK	2	1	1	Q9H0U4		0	0.002	0.0102	1.9847	2	1071.64	-1.01078	103.338	0
	High	LQIWDTAGQER	2	1	1	Q9H0U4		0	0.005	0.02081	2.18012	2	1316.66	-1.05929	98.2022	0
P18206	Vinculin OS=Homo sapiens GN=VCL PE=1 SV=4 - [VINC_HUMAN]	13.8496	5.82	1	5	5	6	1134	123.722	5.65576
	A2	Sequence	# PSMs	# Proteins	# Protein Groups	Protein Group Accessions	Modifications	ΔCn	q-Value	PEP	XCorr	Charge	MH+ [Da]	ΔM [ppm]	RT [min]	# Missed Cleavages
	High	AQQVSQGLDVLTAK	2	1	1	P18206		0	0.001	0.003557	2.72355	2	1457.8	0.616841	92.9072	0
	High	AGEVINQPMMMAAR	1	1	1	P18206		0	0.005	0.02417	2.66883	2	1518.72	-2.54405	95.3875	0
	High	GWLRDPSASPGDAGEQAIR	1	1	1	P18206		0	0.007	0.02632	2.2545	3	1982.97	0.245933	89.8	1
	High	GVGQAAIR	1	1	1	P18206		0	0.007	0.02661	1.99611	2	771.447	-0.57994	37.1559	0
	High	VMLVNSMNTVK	1	1	1	P18206		0	0.008	0.03081	1.82228	2	1235.65	-2.35646	87.2892	0
P13489	Ribonuclease inhibitor OS=Homo sapiens GN=RNH1 PE=1 SV=2 - [RINI_HUMAN]	13.6881	8.89	1	3	3	5	461	49.9411	4.81787
	A2	Sequence	# PSMs	# Proteins	# Protein Groups	Protein Group Accessions	Modifications	ΔCn	q-Value	PEP	XCorr	Charge	MH+ [Da]	ΔM [ppm]	RT [min]	# Missed Cleavages
	High	ELTVSNNDINEAGVR	2	1	1	P13489		0	0	3.162e-08	3.61701	2	1630.8	0.353958	79.0941	0
	High	ELSLAGNELGDEGAR	2	1	1	P13489		0	0	2.194e-05	3.23774	2	1530.74	3.2815	92.032	0
	High	VNPALAELNLR	1	1	1	P13489		0	0.002	0.0108	2.36023	2	1209.7	0.0451834	107.549	0
Q86YZ3	Hornerin OS=Homo sapiens GN=HRNR PE=1 SV=2 - [HORN_HUMAN]	13.6538	11.51	1	6	6	10	2850	282.228	10.0376
	A2	Sequence	# PSMs	# Proteins	# Protein Groups	Protein Group Accessions	Modifications	ΔCn	q-Value	PEP	XCorr	Charge	MH+ [Da]	ΔM [ppm]	RT [min]	# Missed Cleavages
	High	GPYESGSGHSSGLGHR	1	1	1	Q86YZ3		0	0	0.00267	2.54195	3	1584.71	-0.700417	37.1898	0
	High	YGQHGSGSR	1	1	1	Q86YZ3		0	0	0.0002738	2.34949	2	948.428	-0.419949	11.9126	0
	High	QSLGHGQHGSGSGQSPSPSR	3	1	1	Q86YZ3		0	0	0.001461	1.94509	3	1947.9	-0.603464	28.4032	0
	High	YGQQGSGSGQSPSR	2	1	1	Q86YZ3		0	0.001	0.003842	1.93503	2	1395.62	-0.95342	24.4776	0
	High	GSGSGQSPSYGR	2	1	1	Q86YZ3		0	0.003	0.01423	2.59755	2	1139.5	-2.47736	28.9805	0
	High	QGSGSGQSPGHGQR	1	1	1	Q86YZ3		0	0.005	0.01751	1.54266	2	1339.61	0.0668702	11.1756	0
Q13765	Nascent polypeptide-associated complex subunit alpha OS=Homo sapiens GN=NACA PE=1 SV=1 - [NACA_HUMAN]	13.4404	13.49	2	2	2	4	215	23.3697	4.56396
	A2	Sequence	# PSMs	# Proteins	# Protein Groups	Protein Group Accessions	Modifications	ΔCn	q-Value	PEP	XCorr	Charge	MH+ [Da]	ΔM [ppm]	RT [min]	# Missed Cleavages
	High	IEDLSQQAQLAAAEK	2	2	1	Q13765		0	0	0.0001112	3.7637	2	1614.84	1.51206	85.0589	0
	High	SPASDTYIVFGEAK	2	2	1	Q13765		0	0	8.926e-06	3.29684	2	1484.73	1.50883	107.629	0
P06748	Nucleophosmin OS=Homo sapiens GN=NPM1 PE=1 SV=2 - [NPM_HUMAN]	13.3168	20.07	1	3	3	5	294	32.5548	4.77979
	A2	Sequence	# PSMs	# Proteins	# Protein Groups	Protein Group Accessions	Modifications	ΔCn	q-Value	PEP	XCorr	Charge	MH+ [Da]	ΔM [ppm]	RT [min]	# Missed Cleavages
	High	LAADEDDDDDDEEDDDEDDDDDDFDDEEAEEKAPVKK	2	1	1	P06748		0	0	1.379e-11	4.5054	4	4246.56	2.44118	74.4444	2
	High	GPSSVEDIK	2	1	1	P06748		0	0.002	0.008766	2.62734	2	931.473	-0.611421	48.7692	0
	High	VDNDENEHQLSLR	1	1	1	P06748		0	0.005	0.02077	1.55046	2	1568.73	1.10647	59.6099	0
P13647	Keratin, type II cytoskeletal 5 OS=Homo sapiens GN=KRT5 PE=1 SV=3 - [K2C5_HUMAN]	13.2431	5.25	1	2	3	5	590	62.34	7.73779
	A2	Sequence	# PSMs	# Proteins	# Protein Groups	Protein Group Accessions	Modifications	ΔCn	q-Value	PEP	XCorr	Charge	MH+ [Da]	ΔM [ppm]	RT [min]	# Missed Cleavages
	High	YEELQQTAGR	2	1	1	P13647		0	0	2.974e-05	3.12208	2	1194.57	-0.18975	51.5753	0
	High	NKYEDEINKR	2	2	2	P04264;P13647		0	0	0.002241	2.93783	3	1308.65	-0.0705633	53.671	2
	High	SGGGGGGGFGR	1	1	1	P13647		0	0.005	0.02431	2.10413	2	865.39	-1.49315	29.7466	0
P51149	Ras-related protein Rab-7a OS=Homo sapiens GN=RAB7A PE=1 SV=1 - [RAB7A_HUMAN]	13.1231	18.36	1	3	3	5	207	23.4748	6.69775
	A2	Sequence	# PSMs	# Proteins	# Protein Groups	Protein Group Accessions	Modifications	ΔCn	q-Value	PEP	XCorr	Charge	MH+ [Da]	ΔM [ppm]	RT [min]	# Missed Cleavages
	High	EAINVEQAFQTIAR	2	1	1	P51149		0	0	1.243e-05	3.27473	2	1589.83	1.16643	133.322	0
	High	DPENFPFVVLGNK	2	1	1	P51149		0	0	0.001701	2.34564	2	1475.75	0.493584	134.595	0
	High	VIILGDSGVGK	1	1	1	P51149		0	0.001	0.006913	2.57606	2	1057.62	-1.69306	85.7146	0
P27348	14-3-3 protein theta OS=Homo sapiens GN=YWHAQ PE=1 SV=1 - [1433T_HUMAN]	12.7143	16.33	1	2	4	6	245	27.7468	4.77979
	A2	Sequence	# PSMs	# Proteins	# Protein Groups	Protein Group Accessions	Modifications	ΔCn	q-Value	PEP	XCorr	Charge	MH+ [Da]	ΔM [ppm]	RT [min]	# Missed Cleavages
	High	AVTEQGAELSNEER	2	1	1	P27348		0	0	1.078e-07	3.38583	2	1532.72	-0.148652	55.0729	0
	High	DSTLIMQLLR	1	4	4	P62258;P61981;P27348;P63104		0	0	0.001108	2.22551	2	1189.66	-2.09004	139.401	0
	High	LAEQAERYDDMATcMK	1	1	1	P27348	C14(Carbamidomethyl)	0	0.003	0.0141	1.43627	3	1931.83	-0.100099	81.1483	1
	High	LAEQAER	2	4	4	P62258;P61981;P27348;P63104		0	0.004	0.01598	2.35383	2	816.421	0.469142	23.3666	0
P09936	Ubiquitin carboxyl-terminal hydrolase isozyme L1 OS=Homo sapiens GN=UCHL1 PE=1 SV=2 - [UCHL1_HUMAN]	12.4661	23.77	1	4	4	6	223	24.8085	5.47803
	A2	Sequence	# PSMs	# Proteins	# Protein Groups	Protein Group Accessions	Modifications	ΔCn	q-Value	PEP	XCorr	Charge	MH+ [Da]	ΔM [ppm]	RT [min]	# Missed Cleavages
	High	MPFPVNHGASSEDTLLK	1	1	1	P09936		0	0	0.001603	2.43184	3	1842.9	-0.761504	99.2847	0
	High	QIEELKGQEVSPK	2	1	1	P09936		0	0	0.000648	2.2686	2	1484.8	0.66345	55.6489	1
	High	LGVAGQWR	2	1	1	P09936		0	0.001	0.0069	2.42996	2	886.489	0.0871039	80.2947	0
	High	MQLKPMEINPEMLNK	1	1	1	P09936		0	0.002	0.008504	2.64395	3	1815.92	0.968572	112.114	0
Q16555	Dihydropyrimidinase-related protein 2 OS=Homo sapiens GN=DPYSL2 PE=1 SV=1 - [DPYL2_HUMAN]	12.1848	8.57	1	4	4	6	572	62.2546	6.37939
	A2	Sequence	# PSMs	# Proteins	# Protein Groups	Protein Group Accessions	Modifications	ΔCn	q-Value	PEP	XCorr	Charge	MH+ [Da]	ΔM [ppm]	RT [min]	# Missed Cleavages
	High	SSAEVIAQAR	2	1	1	Q16555		0	0	1.383e-05	3.10026	2	1031.55	-1.09418	49.3949	0
	High	MDENQFVAVTSTNAAK	2	1	1	Q16555		0	0.001	0.003779	2.66649	2	1725.81	0.999286	89.4455	0
	High	GSPLVVISQGK	1	1	1	Q16555		0	0.006	0.0251	1.6609	2	1084.64	0.23864	84.5718	0
	High	MVIPGGIDVHTR	1	1	1	Q16555		0	0.008	0.02916	1.87854	3	1294.69	-0.772135	92.0846	0
P08758	Annexin A5 OS=Homo sapiens GN=ANXA5 PE=1 SV=2 - [ANXA5_HUMAN]	11.6786	9.69	1	4	4	5	320	35.9144	5.04639
	A2	Sequence	# PSMs	# Proteins	# Protein Groups	Protein Group Accessions	Modifications	ΔCn	q-Value	PEP	XCorr	Charge	MH+ [Da]	ΔM [ppm]	RT [min]	# Missed Cleavages
	High	VLTEIIASR	2	1	1	P08758		0	0	0.0007849	2.89749	2	1001.6	-2.41223	85.6828	0
	High	GTVTDFPGFDER	1	1	1	P08758		0	0	0.0001471	2.52241	2	1340.61	1.1469	105.426	0
	High	SEIDLFNIR	1	1	1	P08758		0	0.001	0.00585	2.02321	2	1106.59	2.1436	129.09	0
	High	SEIDLFNIRK	1	1	1	P08758		0	0.008	0.03597	2.07001	2	1234.68	1.13084	108.576	1
P26641	Elongation factor 1-gamma OS=Homo sapiens GN=EEF1G PE=1 SV=3 - [EF1G_HUMAN]	11.3487	7.78	1	3	3	5	437	50.0871	6.66846
	A2	Sequence	# PSMs	# Proteins	# Protein Groups	Protein Group Accessions	Modifications	ΔCn	q-Value	PEP	XCorr	Charge	MH+ [Da]	ΔM [ppm]	RT [min]	# Missed Cleavages
	High	ALIAAQYSGAQVR	2	1	1	P26641		0	0	4.713e-06	4.13437	2	1347.74	-1.37246	81.3371	0
	High	KLDPGSEETQTLVR	2	1	1	P26641		0	0.001	0.004326	1.75884	2	1572.82	0.744462	67.6748	1
	High	FAETQPK	1	1	1	P26641		0	0.008	0.02971	1.42722	2	820.419	-0.609575	31.6282	0
Q92597	Protein NDRG1 OS=Homo sapiens GN=NDRG1 PE=1 SV=1 - [NDRG1_HUMAN]	11.2374	9.9	1	2	2	4	394	42.8077	5.8208
	A2	Sequence	# PSMs	# Proteins	# Protein Groups	Protein Group Accessions	Modifications	ΔCn	q-Value	PEP	XCorr	Charge	MH+ [Da]	ΔM [ppm]	RT [min]	# Missed Cleavages
	High	SHTSEGAHLDITPNSGAAGNSAGPK	2	1	1	Q92597		0	0	0.0001888	3.29477	3	2376.12	1.44965	66.1885	0
	High	TASGSSVTSLDGTR	2	1	1	Q92597		0	0	0.0004684	2.7563	2	1338.65	0.610259	55.2181	0
P40925	Malate dehydrogenase, cytoplasmic OS=Homo sapiens GN=MDH1 PE=1 SV=4 - [MDHC_HUMAN]	11.2047	11.38	1	3	3	5	334	36.403	7.35693
	A2	Sequence	# PSMs	# Proteins	# Protein Groups	Protein Group Accessions	Modifications	ΔCn	q-Value	PEP	XCorr	Charge	MH+ [Da]	ΔM [ppm]	RT [min]	# Missed Cleavages
	High	VIVVGNPANTNcLTASK	2	1	1	P40925	C12(Carbamidomethyl)	0	0	7.829e-05	2.58822	2	1757.92	0.989845	84.7038	0
	High	FVEGLPINDFSR	2	1	1	P40925		0	0.001	0.006061	2.26443	2	1393.71	0.960487	120.705	0
	High	LGVTANDVK	1	1	1	P40925		0	0.003	0.01196	2.23764	2	916.509	-1.32868	52.9602	0
P22626	Heterogeneous nuclear ribonucleoproteins A2/B1 OS=Homo sapiens GN=HNRNPA2B1 PE=1 SV=2 - [ROA2_HUMAN]	10.9331	12.75	1	4	4	8	353	37.4067	8.95361
	A2	Sequence	# PSMs	# Proteins	# Protein Groups	Protein Group Accessions	Modifications	ΔCn	q-Value	PEP	XCorr	Charge	MH+ [Da]	ΔM [ppm]	RT [min]	# Missed Cleavages
	High	GGNFGFGDSR	2	1	1	P22626		0	0	0.0001425	2.40758	2	1013.45	1.68511	77.5881	0
	High	QEMQEVQSSR	1	1	1	P22626		0	0	0.002306	1.85665	2	1221.55	0.018619	36.6617	0
	High	GGSDGYGSGR	2	1	1	P22626		0	0.005	0.01869	1.77112	2	912.38	-0.912952	23.5862	0
	High	GGGGNFGPGPGSNFR	3	1	1	P22626		0	0.005	0.02449	1.56868	2	1377.63	0.296967	78.4167	0
Q16658	Fascin OS=Homo sapiens GN=FSCN1 PE=1 SV=3 - [FSCN1_HUMAN]	10.8457	5.27	1	2	2	3	493	54.4961	7.23975
	A2	Sequence	# PSMs	# Proteins	# Protein Groups	Protein Group Accessions	Modifications	ΔCn	q-Value	PEP	XCorr	Charge	MH+ [Da]	ΔM [ppm]	RT [min]	# Missed Cleavages
	High	LVARPEPATGYTLEFR	2	1	1	Q16658		0	0	0.0001461	4.52723	3	1819.97	-0.102444	103.817	0
	High	FLIVAHDDGR	1	1	1	Q16658		0	0.008	0.02784	2.02692	2	1142.59	-6.15871	73.8067	0
Q15293	Reticulocalbin-1 OS=Homo sapiens GN=RCN1 PE=1 SV=1 - [RCN1_HUMAN]	10.3934	13.29	1	3	3	4	331	38.8662	4.99561
	A2	Sequence	# PSMs	# Proteins	# Protein Groups	Protein Group Accessions	Modifications	ΔCn	q-Value	PEP	XCorr	Charge	MH+ [Da]	ΔM [ppm]	RT [min]	# Missed Cleavages
	High	AADLNGDLTATR	2	1	1	Q15293		0	0	1.487e-05	2.75013	2	1217.61	-0.411819	67.2966	0
	High	TFDQLTPDESKER	1	1	1	Q15293		0	0	0.0002456	2.63404	2	1565.74	0.421107	67.1928	1
	High	IVDRIDNDGDGFVTTEELK	1	1	1	Q15293		0	0.005	0.02013	2.73277	3	2136.04	-0.630445	99.6148	1
P34932	Heat shock 70 kDa protein 4 OS=Homo sapiens GN=HSPA4 PE=1 SV=4 - [HSP74_HUMAN]	10.3267	3.21	1	2	2	4	840	94.2712	5.18604
	A2	Sequence	# PSMs	# Proteins	# Protein Groups	Protein Group Accessions	Modifications	ΔCn	q-Value	PEP	XCorr	Charge	MH+ [Da]	ΔM [ppm]	RT [min]	# Missed Cleavages
	High	VLATAFDTTLGGR	2	1	1	P34932		0	0	0.0001803	3.07763	2	1321.71	-0.00312545	105.299	0
	High	AGGIETIANEYSDR	2	1	1	P34932		0	0.005	0.01779	1.80493	2	1495.7	1.66496	97.7504	0
Q8IZP2	Putative protein FAM10A4 OS=Homo sapiens GN=ST13P4 PE=5 SV=1 - [ST134_HUMAN]	10.29	11.25	2	2	2	4	240	27.3897	5.08447
	A2	Sequence	# PSMs	# Proteins	# Protein Groups	Protein Group Accessions	Modifications	ΔCn	q-Value	PEP	XCorr	Charge	MH+ [Da]	ΔM [ppm]	RT [min]	# Missed Cleavages
	High	VAAIEALNDGELQK	2	2	1	Q8IZP2		0	0	4.449e-07	3.58625	2	1470.78	-0.232996	94.1751	0
	High	AIEINPDSAQPYK	2	2	1	Q8IZP2		0	0.001	0.004651	1.7148	2	1445.72	-2.56275	81.145	0
P60842	Eukaryotic initiation factor 4A-I OS=Homo sapiens GN=EIF4A1 PE=1 SV=1 - [IF4A1_HUMAN]	10.2879	7.14	1	2	2	4	406	46.1246	5.47803
	A2	Sequence	# PSMs	# Proteins	# Protein Groups	Protein Group Accessions	Modifications	ΔCn	q-Value	PEP	XCorr	Charge	MH+ [Da]	ΔM [ppm]	RT [min]	# Missed Cleavages
	High	GYDVIAQAQSGTGK	2	1	1	P60842		0	0	2.504e-06	3.31337	2	1394.69	1.8354	74.8504	0
	High	LQMEAPHIIVGTPGR	2	1	1	P60842		0	0	0.0002998	2.06473	3	1618.87	-0.875838	98.6195	0
P61204	ADP-ribosylation factor 3 OS=Homo sapiens GN=ARF3 PE=1 SV=2 - [ARF3_HUMAN]	9.78108	14.36	2	2	2	4	181	20.5877	7.43018
	A2	Sequence	# PSMs	# Proteins	# Protein Groups	Protein Group Accessions	Modifications	ΔCn	q-Value	PEP	XCorr	Charge	MH+ [Da]	ΔM [ppm]	RT [min]	# Missed Cleavages
	High	ILMVGLDAAGK	2	2	1	P61204		0	0	5.553e-05	3.04369	2	1087.62	0.129054	102.9	0
	High	QDLPNAMNAAEITDK	2	2	1	P61204		0	0	0.002428	1.99006	2	1630.77	-1.41229	93.5632	0
Q9UQ80	Proliferation-associated protein 2G4 OS=Homo sapiens GN=PA2G4 PE=1 SV=3 - [PA2G4_HUMAN]	9.71106	11.68	1	4	4	7	394	43.7592	6.55127
	A2	Sequence	# PSMs	# Proteins	# Protein Groups	Protein Group Accessions	Modifications	ΔCn	q-Value	PEP	XCorr	Charge	MH+ [Da]	ΔM [ppm]	RT [min]	# Missed Cleavages
	High	TAENATSGETLEENEAGD	2	1	1	Q9UQ80		0	0	0.002075	1.10227	2	1837.76	-0.378747	62.1062	0
	High	FDAMPFTLR	2	1	1	Q9UQ80		0	0.001	0.006491	2.00316	2	1097.55	0.40489	127.742	0
	High	MGGDIANR	2	1	1	Q9UQ80		0	0.005	0.01993	1.87141	2	833.393	-0.355486	36.8867	0
	High	TIIQNPTDQQK	1	1	1	Q9UQ80		0	0.009	0.03754	2.3631	2	1285.68	1.44669	55.4209	0
P13674	Prolyl 4-hydroxylase subunit alpha-1 OS=Homo sapiens GN=P4HA1 PE=1 SV=2 - [P4HA1_HUMAN]	9.65588	5.43	1	2	2	3	534	61.011	6.01123
	A2	Sequence	# PSMs	# Proteins	# Protein Groups	Protein Group Accessions	Modifications	ΔCn	q-Value	PEP	XCorr	Charge	MH+ [Da]	ΔM [ppm]	RT [min]	# Missed Cleavages
	High	SAWLSGYENPVVSR	2	1	1	P13674		0	0	3.112e-07	3.85375	2	1564.77	-0.501988	112.472	0
	High	KDEPDAFKELGTGNR	1	1	1	P13674		0	0	4.931e-05	2.29048	3	1676.82	-1.15498	74.8271	2
P15531	Nucleoside diphosphate kinase A OS=Homo sapiens GN=NME1 PE=1 SV=1 - [NDKA_HUMAN]	9.54283	19.08	2	2	2	4	152	17.1377	6.18896
	A2	Sequence	# PSMs	# Proteins	# Protein Groups	Protein Group Accessions	Modifications	ΔCn	q-Value	PEP	XCorr	Charge	MH+ [Da]	ΔM [ppm]	RT [min]	# Missed Cleavages
	High	VMLGETNPADSKPGTIR	2	2	1	P15531		0	0	0.001614	2.24881	2	1785.92	0.187212	72.9298	0
	High	TFIAIKPDGVQR	2	2	1	P15531		0	0.008	0.03105	2.64319	2	1344.76	-0.912184	81.1172	0
P01891	HLA class I histocompatibility antigen, A-68 alpha chain OS=Homo sapiens GN=HLA-A PE=1 SV=4 - [1A68_HUMAN]	9.42257	9.04	18	2	2	4	365	40.8831	6.69775
	A2	Sequence	# PSMs	# Proteins	# Protein Groups	Protein Group Accessions	Modifications	ΔCn	q-Value	PEP	XCorr	Charge	MH+ [Da]	ΔM [ppm]	RT [min]	# Missed Cleavages
	High	DGEDQTQDTELVETRPAGDGTFQK	2	18	1	P01891		0	0	0.002524	2.8228	3	2637.19	-0.927671	80.368	0
	High	FDSDAASQR	2	18	1	P01891		0	0	0.002897	1.98576	2	996.438	-0.493389	34.7494	0
P05023	Sodium/potassium-transporting ATPase subunit alpha-1 OS=Homo sapiens GN=ATP1A1 PE=1 SV=1 - [AT1A1_HUMAN]	9.34452	2.74	1	2	2	4	1023	112.824	5.49072
	A2	Sequence	# PSMs	# Proteins	# Protein Groups	Protein Group Accessions	Modifications	ΔCn	q-Value	PEP	XCorr	Charge	MH+ [Da]	ΔM [ppm]	RT [min]	# Missed Cleavages
	High	VDNSSLTGESEPQTR	2	1	1	P05023		0	0	0.0001885	2.24736	2	1619.75	0.665135	49.9553	0
	High	SPDFTNENPLETR	2	1	1	P05023		0	0.002	0.009466	2.95745	2	1519.7	0.674763	94.5079	0
Q99729	Heterogeneous nuclear ribonucleoprotein A/B OS=Homo sapiens GN=HNRNPAB PE=1 SV=2 - [ROAA_HUMAN]	9.20991	6.93	1	1	2	4	332	36.2024	8.20654
	A2	Sequence	# PSMs	# Proteins	# Protein Groups	Protein Group Accessions	Modifications	ΔCn	q-Value	PEP	XCorr	Charge	MH+ [Da]	ΔM [ppm]	RT [min]	# Missed Cleavages
	High	EVYQQQQYGSGGR	2	1	1	Q99729		0	0	0.0006713	2.71204	2	1499.69	-0.2147	49.0883	0
	High	FGEVVDcTIK	2	2	2	Q99729;Q14103	C7(Carbamidomethyl)	0	0.005	0.01929	2.19542	2	1167.57	-0.972277	85.4094	0
P11940	Polyadenylate-binding protein 1 OS=Homo sapiens GN=PABPC1 PE=1 SV=2 - [PABP1_HUMAN]	9.19571	3.93	1	2	2	4	636	70.6259	9.49561
	A2	Sequence	# PSMs	# Proteins	# Protein Groups	Protein Group Accessions	Modifications	ΔCn	q-Value	PEP	XCorr	Charge	MH+ [Da]	ΔM [ppm]	RT [min]	# Missed Cleavages
	High	SLGYAYVNFQQPADAER	3	1	1	P11940		0	0	0.0007641	2.88908	2	1928.92	2.95497	110.263	0
	High	FGPALSVK	1	1	1	P11940		0	0.008	0.0295	1.84043	2	818.477	0.431644	80.952	0
P19338	Nucleolin OS=Homo sapiens GN=NCL PE=1 SV=3 - [NUCL_HUMAN]	9.0025	6.2	1	3	3	4	710	76.5684	4.70361
	A2	Sequence	# PSMs	# Proteins	# Protein Groups	Protein Group Accessions	Modifications	ΔCn	q-Value	PEP	XCorr	Charge	MH+ [Da]	ΔM [ppm]	RT [min]	# Missed Cleavages
	High	GFGFVDFNSEEDAK	2	1	1	P19338		0	0	0.0007106	2.30075	2	1561.68	1.86208	123.344	0
	High	TEADAEKTFEEKQGTEIDGR	1	1	1	P19338		0	0.004	0.01589	2.60124	3	2254.04	-2.00335	72.9843	2
	High	SISLYYTGEK	1	1	1	P19338		0	0.008	0.03427	2.08461	2	1160.58	-0.29803	91.2635	0
Q92945	Far upstream element-binding protein 2 OS=Homo sapiens GN=KHSRP PE=1 SV=4 - [FUBP2_HUMAN]	8.92402	3.38	1	2	2	4	711	73.07	7.29834
	A2	Sequence	# PSMs	# Proteins	# Protein Groups	Protein Group Accessions	Modifications	ΔCn	q-Value	PEP	XCorr	Charge	MH+ [Da]	ΔM [ppm]	RT [min]	# Missed Cleavages
	High	VQISPDSGGLPER	2	1	1	Q92945		0	0	0.0002991	2.40674	2	1354.69	-1.60477	73.8536	0
	High	IGGGIDVPVPR	2	1	1	Q92945		0	0.005	0.01848	2.1213	2	1079.62	-0.626622	90.9921	0
P16070	CD44 antigen OS=Homo sapiens GN=CD44 PE=1 SV=3 - [CD44_HUMAN]	8.92086	3.91	1	2	2	4	742	81.4874	5.32568
	A2	Sequence	# PSMs	# Proteins	# Protein Groups	Protein Group Accessions	Modifications	ΔCn	q-Value	PEP	XCorr	Charge	MH+ [Da]	ΔM [ppm]	RT [min]	# Missed Cleavages
	High	ESSETPDQFMTADETR	2	1	1	P16070		0	0	0.0005268	2.14514	2	1843.77	-0.0482994	88.5161	0
	High	LVINSGNGAVEDR	2	1	1	P16070		0	0.001	0.006333	2.2057	2	1343.69	-1.8076	64.8661	0
P36957	Dihydrolipoyllysine-residue succinyltransferase component of 2-oxoglutarate dehydrogenase complex, mitochondrial OS=Homo sapiens GN=DLST PE=1 SV=4 - [ODO2_HUMAN]	8.84499	5.74	1	2	2	4	453	48.7245	8.95361
	A2	Sequence	# PSMs	# Proteins	# Protein Groups	Protein Group Accessions	Modifications	ΔCn	q-Value	PEP	XCorr	Charge	MH+ [Da]	ΔM [ppm]	RT [min]	# Missed Cleavages
	High	TPAFAESVTEGDVR	2	1	1	P36957		0	0	0.000398	2.45943	2	1478.71	1.54448	88.4943	0
	High	NVEAMNFADIER	2	1	1	P36957		0	0	0.0004295	2.38888	2	1408.65	-0.683187	110.473	0
P31943	Heterogeneous nuclear ribonucleoprotein H OS=Homo sapiens GN=HNRNPH1 PE=1 SV=4 - [HNRH1_HUMAN]	8.80936	5.79	2	2	2	4	449	49.1984	6.30322
	A2	Sequence	# PSMs	# Proteins	# Protein Groups	Protein Group Accessions	Modifications	ΔCn	q-Value	PEP	XCorr	Charge	MH+ [Da]	ΔM [ppm]	RT [min]	# Missed Cleavages
	High	VHIEIGPDGR	2	2	1	P31943		0	0.002	0.008733	2.76237	2	1092.58	-0.831381	68.4801	0
	High	HTGPNSPDTANDGFVR	2	2	1	P31943		0	0.002	0.008249	2.28456	3	1684.76	-1.83046	58.6235	0
P09382	Galectin-1 OS=Homo sapiens GN=LGALS1 PE=1 SV=2 - [LEG1_HUMAN]	8.64797	22.22	1	4	4	4	135	14.7062	5.50342
	A2	Sequence	# PSMs	# Proteins	# Protein Groups	Protein Group Accessions	Modifications	ΔCn	q-Value	PEP	XCorr	Charge	MH+ [Da]	ΔM [ppm]	RT [min]	# Missed Cleavages
	High	LPDGYEFKFPNR	1	1	1	P09382		0	0.001	0.004185	2.74978	2	1482.73	-2.0952	108.579	1
	High	VRGEVAPDAK	1	1	1	P09382		0	0.001	0.003962	2.30633	2	1041.57	-1.43338	24.5953	1
	High	LPDGYEFK	1	1	1	P09382		0	0.003	0.01269	1.85569	2	968.472	-0.769304	86.6424	0
	High	SFVLNLGK	1	1	1	P09382		0	0.005	0.02108	1.73617	2	877.514	0.262783	106.295	0
P05556	Integrin beta-1 OS=Homo sapiens GN=ITGB1 PE=1 SV=2 - [ITB1_HUMAN]	8.37162	2.38	1	2	2	4	798	88.357	5.38916
	A2	Sequence	# PSMs	# Proteins	# Protein Groups	Protein Group Accessions	Modifications	ΔCn	q-Value	PEP	XCorr	Charge	MH+ [Da]	ΔM [ppm]	RT [min]	# Missed Cleavages
	High	SAVTTVVNPK	2	1	1	P05556		0	0	0.00301	2.15604	2	1015.58	2.23682	49.8001	0
	High	IGFGSFVEK	2	1	1	P05556		0	0.004	0.0154	1.72679	2	983.52	0.299734	109.287	0
P07858	Cathepsin B OS=Homo sapiens GN=CTSB PE=1 SV=3 - [CATB_HUMAN]	8.37083	7.67	1	2	2	4	339	37.7968	6.30322
	A2	Sequence	# PSMs	# Proteins	# Protein Groups	Protein Group Accessions	Modifications	ΔCn	q-Value	PEP	XCorr	Charge	MH+ [Da]	ΔM [ppm]	RT [min]	# Missed Cleavages
	High	SGVYQHVTGEMMGGHAIR	2	1	1	P07858		0	0.002	0.009637	2.09876	3	1929.89	-6.69613	93.0769	0
	High	LPASFDAR	2	1	1	P07858		0	0.005	0.0176	1.95553	2	876.457	-0.134987	68.8904	0
P46777	60S ribosomal protein L5 OS=Homo sapiens GN=RPL5 PE=1 SV=3 - [RL5_HUMAN]	8.33551	12.79	1	3	3	4	297	34.3407	9.71533
	A2	Sequence	# PSMs	# Proteins	# Protein Groups	Protein Group Accessions	Modifications	ΔCn	q-Value	PEP	XCorr	Charge	MH+ [Da]	ΔM [ppm]	RT [min]	# Missed Cleavages
	High	HIMGQNVADYMR	2	1	1	P46777		0	0.001	0.005983	2.1024	2	1434.66	-1.5752	88.277	0
	High	YLMEEDEDAYKK	1	1	1	P46777		0	0.001	0.003278	1.72786	2	1533.68	-1.53139	73.0101	1
	High	GAVDGGLSIPHSTK	1	1	1	P46777		0	0.005	0.01829	2.29611	2	1338.7	2.60566	69.9361	0
Q15942	Zyxin OS=Homo sapiens GN=ZYX PE=1 SV=1 - [ZYX_HUMAN]	8.25303	10.31	1	3	3	3	572	61.2382	6.66846
	A2	Sequence	# PSMs	# Proteins	# Protein Groups	Protein Group Accessions	Modifications	ΔCn	q-Value	PEP	XCorr	Charge	MH+ [Da]	ΔM [ppm]	RT [min]	# Missed Cleavages
	High	LGHPEALSAGTGSPQPPSFTYAQQR	1	1	1	Q15942		0	0	1.179e-05	3.38106	3	2597.27	-0.236583	93.4947	0
	High	QHPVPPPAQNQNQVR	1	1	1	Q15942		0	0	5.258e-05	2.708	3	1709.88	-0.500034	37.0943	0
	High	VNPFRPGDSEPPPAPGAQR	1	1	1	Q15942		0	0.003	0.01237	2.16397	3	1988.99	0.520295	73.356	0
P84098	60S ribosomal protein L19 OS=Homo sapiens GN=RPL19 PE=1 SV=1 - [RL19_HUMAN]	8.10712	13.27	1	2	2	3	196	23.4512	11.4731
	A2	Sequence	# PSMs	# Proteins	# Protein Groups	Protein Group Accessions	Modifications	ΔCn	q-Value	PEP	XCorr	Charge	MH+ [Da]	ΔM [ppm]	RT [min]	# Missed Cleavages
	High	VWLDPNETNEIANANSR	2	1	1	P84098		0	0	4.882e-08	3.1028	2	1942.93	2.78056	103.846	0
	High	LLADQAEAR	1	1	1	P84098		0	0.003	0.01362	2.05405	2	986.526	-0.240793	47.5705	0
P29692	Elongation factor 1-delta OS=Homo sapiens GN=EEF1D PE=1 SV=5 - [EF1D_HUMAN]	8.05818	9.25	1	2	2	3	281	31.1028	5.0083
	A2	Sequence	# PSMs	# Proteins	# Protein Groups	Protein Group Accessions	Modifications	ΔCn	q-Value	PEP	XCorr	Charge	MH+ [Da]	ΔM [ppm]	RT [min]	# Missed Cleavages
	High	FYEQMNGPVAGASR	2	1	1	P29692		0	0	2.327e-06	3.36378	2	1526.71	-0.303599	78.9167	0
	High	IASLEVENQSLR	1	1	1	P29692		0	0.005	0.02047	2.10454	2	1358.73	-1.35992	84.3375	0
O75396	Vesicle-trafficking protein SEC22b OS=Homo sapiens GN=SEC22B PE=1 SV=4 - [SC22B_HUMAN]	7.83668	11.16	1	2	2	3	215	24.5775	6.91748
	A2	Sequence	# PSMs	# Proteins	# Protein Groups	Protein Group Accessions	Modifications	ΔCn	q-Value	PEP	XCorr	Charge	MH+ [Da]	ΔM [ppm]	RT [min]	# Missed Cleavages
	High	NLGSINTELQDVQR	2	1	1	O75396		0	0	7.884e-07	2.96407	2	1586.81	0.961445	100.135	0
	High	GEALSALDSK	1	1	1	O75396		0	0.003	0.01276	2.51142	2	990.516	5.76111	67.3158	0
Q01844	RNA-binding protein EWS OS=Homo sapiens GN=EWSR1 PE=1 SV=1 - [EWS_HUMAN]	7.79648	4.42	1	2	2	4	656	68.4357	9.33447
	A2	Sequence	# PSMs	# Proteins	# Protein Groups	Protein Group Accessions	Modifications	ΔCn	q-Value	PEP	XCorr	Charge	MH+ [Da]	ΔM [ppm]	RT [min]	# Missed Cleavages
	High	GGPGGPGGPGGPMGR	2	1	1	Q01844		0	0.001	0.007077	1.86244	2	1207.56	-1.21554	50.6062	0
	High	GDATVSYEDPPTAK	2	1	1	Q01844		0	0.005	0.0207	1.71546	2	1450.67	-0.818016	60.3298	0
P62249	40S ribosomal protein S16 OS=Homo sapiens GN=RPS16 PE=1 SV=2 - [RS16_HUMAN]	7.75456	13.01	1	2	2	3	146	16.435	10.2134
	A2	Sequence	# PSMs	# Proteins	# Protein Groups	Protein Group Accessions	Modifications	ΔCn	q-Value	PEP	XCorr	Charge	MH+ [Da]	ΔM [ppm]	RT [min]	# Missed Cleavages
	High	GPLQSVQVFGR	2	1	1	P62249		0	0	3.177e-05	2.96483	2	1187.65	-1.39304	105.997	0
	High	TLLVADPR	1	1	1	P62249		0	0.009	0.03704	2.33438	2	884.52	0.098206	72.8844	0
P39019	40S ribosomal protein S19 OS=Homo sapiens GN=RPS19 PE=1 SV=2 - [RS19_HUMAN]	7.74905	12.41	1	2	2	3	145	16.0505	10.3159
	A2	Sequence	# PSMs	# Proteins	# Protein Groups	Protein Group Accessions	Modifications	ΔCn	q-Value	PEP	XCorr	Charge	MH+ [Da]	ΔM [ppm]	RT [min]	# Missed Cleavages
	High	DVNQQEFVR	2	1	1	P39019		0	0	0.001514	2.73999	2	1134.55	-0.628543	66.6463	0
	High	VLQALEGLK	1	1	1	P39019		0	0.005	0.01826	2.30181	2	970.592	-1.40824	98.2664	0
P52907	F-actin-capping protein subunit alpha-1 OS=Homo sapiens GN=CAPZA1 PE=1 SV=3 - [CAZA1_HUMAN]	7.37887	8.74	1	2	2	4	286	32.9023	5.69385
	A2	Sequence	# PSMs	# Proteins	# Protein Groups	Protein Group Accessions	Modifications	ΔCn	q-Value	PEP	XCorr	Charge	MH+ [Da]	ΔM [ppm]	RT [min]	# Missed Cleavages
	High	LLLNNDNLLR	2	1	1	P52907		0	0	0.001628	2.28844	2	1197.7	0.869353	109.964	0
	High	EASDPQPEEADGGLK	2	1	1	P52907		0	0	1.846e-05	2.28631	2	1542.69	0.494753	53.8267	0
P50990	T-complex protein 1 subunit theta OS=Homo sapiens GN=CCT8 PE=1 SV=4 - [TCPQ_HUMAN]	7.36594	3.47	1	2	2	3	548	59.5825	5.60498
	A2	Sequence	# PSMs	# Proteins	# Protein Groups	Protein Group Accessions	Modifications	ΔCn	q-Value	PEP	XCorr	Charge	MH+ [Da]	ΔM [ppm]	RT [min]	# Missed Cleavages
	High	FAEAFEAIPR	2	1	1	P50990		0	0	0.0003168	3.09856	2	1150.59	-0.885578	106.531	0
	High	TVGATALPR	1	1	1	P50990		0	0.003	0.01308	1.70434	2	885.515	-0.0518877	56.0592	0
P62263	40S ribosomal protein S14 OS=Homo sapiens GN=RPS14 PE=1 SV=3 - [RS14_HUMAN]	7.32283	22.52	1	2	2	3	151	16.2625	10.0522
	A2	Sequence	# PSMs	# Proteins	# Protein Groups	Protein Group Accessions	Modifications	ΔCn	q-Value	PEP	XCorr	Charge	MH+ [Da]	ΔM [ppm]	RT [min]	# Missed Cleavages
	High	IEDVTPIPSDSTR	2	1	1	P62263		0	0.001	0.003596	2.40809	2	1429.72	0.0750599	73.4011	0
	High	ADRDESSPYAAMLAAQDVAQR	1	1	1	P62263		0	0.002	0.01051	2.61648	3	2265.05	-2.66708	111.255	1
P23588	Eukaryotic translation initiation factor 4B OS=Homo sapiens GN=EIF4B PE=1 SV=2 - [IF4B_HUMAN]	7.18834	2.95	1	2	2	3	611	69.1103	5.73193
	A2	Sequence	# PSMs	# Proteins	# Protein Groups	Protein Group Accessions	Modifications	ΔCn	q-Value	PEP	XCorr	Charge	MH+ [Da]	ΔM [ppm]	RT [min]	# Missed Cleavages
	High	TGSESSQTGTSTTSSR	2	1	1	P23588		0	0	2.333e-05	2.76999	2	1573.69	0.381374	17.5182	0
	High	SRTGSESSQTGTSTTSSR	1	1	1	P23588		0	0.007	0.02591	2.05838	3	1816.83	-0.702687	16.9791	1
P63244	Guanine nucleotide-binding protein subunit beta-2-like 1 OS=Homo sapiens GN=GNB2L1 PE=1 SV=3 - [GBLP_HUMAN]	7.15718	13.25	1	3	3	3	317	35.0546	7.69385
	A2	Sequence	# PSMs	# Proteins	# Protein Groups	Protein Group Accessions	Modifications	ΔCn	q-Value	PEP	XCorr	Charge	MH+ [Da]	ΔM [ppm]	RT [min]	# Missed Cleavages
	High	IIVDELKQEVISTSSK	1	1	1	P63244		0	0	0.0002973	2.78209	2	1789	0.345433	106.78	1
	High	LTRDETNYGIPQR	1	1	1	P63244		0	0	0.001109	2.12224	3	1562.79	0.551984	66.4879	1
	High	DGQAMLWDLNEGK	1	1	1	P63244		0	0.003	0.01406	2.25285	2	1476.68	3.41589	119.922	0
P55884	Eukaryotic translation initiation factor 3 subunit B OS=Homo sapiens GN=EIF3B PE=1 SV=3 - [EIF3B_HUMAN]	6.98944	2.83	1	2	2	3	814	92.4238	4.99561
	A2	Sequence	# PSMs	# Proteins	# Protein Groups	Protein Group Accessions	Modifications	ΔCn	q-Value	PEP	XCorr	Charge	MH+ [Da]	ΔM [ppm]	RT [min]	# Missed Cleavages
	High	AQAVSEDAGGNEGR	2	1	1	P55884		0	0	0.001617	2.35515	2	1360.61	-0.559658	29.6935	0
	High	VTLMQLPTR	1	1	1	P55884		0	0.003	0.01318	2.28548	2	1058.6	-0.251944	99.8451	0
Q14697	Neutral alpha-glucosidase AB OS=Homo sapiens GN=GANAB PE=1 SV=3 - [GANAB_HUMAN]	6.87843	3.07	1	2	2	4	944	106.807	6.13818
	A2	Sequence	# PSMs	# Proteins	# Protein Groups	Protein Group Accessions	Modifications	ΔCn	q-Value	PEP	XCorr	Charge	MH+ [Da]	ΔM [ppm]	RT [min]	# Missed Cleavages
	High	MMDYLQGSGETPQTDVR	2	1	1	Q14697		0	0	1.289e-06	2.40292	2	1927.86	2.43484	94.5562	0
	High	SGGMERPFVLAR	2	1	1	Q14697		0	0.003	0.01199	1.64986	3	1319.69	0.984259	88.1055	0
P22314	Ubiquitin-like modifier-activating enzyme 1 OS=Homo sapiens GN=UBA1 PE=1 SV=3 - [UBA1_HUMAN]	6.87252	4.25	1	3	3	4	1058	117.774	5.75732
	A2	Sequence	# PSMs	# Proteins	# Protein Groups	Protein Group Accessions	Modifications	ΔCn	q-Value	PEP	XCorr	Charge	MH+ [Da]	ΔM [ppm]	RT [min]	# Missed Cleavages
	High	YDGQVAVFGSDLQEK	1	1	1	P22314		0	0	4.849e-05	2.5323	2	1655.79	-0.0894293	103.376	0
	High	QPAENVNQYLTDPK	2	1	1	P22314		0	0.003	0.01274	1.32522	2	1616.79	1.29602	86.6174	0
	High	ALPAVQQNNLDEDLIR	1	1	1	P22314		0	0.004	0.01653	1.80727	2	1808.95	2.25541	110.227	0
Q09666	Neuroblast differentiation-associated protein AHNAK OS=Homo sapiens GN=AHNAK PE=1 SV=2 - [AHNK_HUMAN]	6.7256	3.29	1	5	5	8	5890	628.699	6.15088
	A2	Sequence	# PSMs	# Proteins	# Protein Groups	Protein Group Accessions	Modifications	ΔCn	q-Value	PEP	XCorr	Charge	MH+ [Da]	ΔM [ppm]	RT [min]	# Missed Cleavages
	High	VDINAPDVEVQGK	2	1	1	Q09666		0	0	0.002105	1.58047	2	1383.71	0.501912	79.204	0
	High	LPSGSGAASPTGSAVDIR	1	1	1	Q09666		0	0.001	0.007574	2.7608	2	1642.84	2.49216	73.6375	0
	High	VDVEVPDVSLEGPEGK	2	1	1	Q09666		0	0.001	0.003616	2.06163	2	1668.83	0.31654	107.652	0
	High	ADIDVSGPK	2	1	1	Q09666		0	0.002	0.01072	1.56898	2	901.462	-0.495343	50.0315	0
	High	VDIDTPDINIEGSEGK	1	1	1	Q09666		0	0.005	0.02034	1.25809	2	1701.82	-0.456629	99.5394	0
P23246	Splicing factor, proline- and glutamine-rich OS=Homo sapiens GN=SFPQ PE=1 SV=2 - [SFPQ_HUMAN]	6.68322	3.68	1	2	2	3	707	76.1016	9.43701
	A2	Sequence	# PSMs	# Proteins	# Protein Groups	Protein Group Accessions	Modifications	ΔCn	q-Value	PEP	XCorr	Charge	MH+ [Da]	ΔM [ppm]	RT [min]	# Missed Cleavages
	High	FGQGGAGPVGGQGPR	2	1	1	P23246		0	0.001	0.004178	2.22747	2	1341.67	0.113235	56.0112	0
	High	YGEPGEVFINK	1	1	1	P23246		0	0.005	0.01796	2.14598	2	1252.62	-2.81341	90.5123	0
P31949	Protein S100-A11 OS=Homo sapiens GN=S100A11 PE=1 SV=2 - [S10AB_HUMAN]	6.66613	24.76	1	2	2	4	105	11.7328	7.12256
	A2	Sequence	# PSMs	# Proteins	# Protein Groups	Protein Group Accessions	Modifications	ΔCn	q-Value	PEP	XCorr	Charge	MH+ [Da]	ΔM [ppm]	RT [min]	# Missed Cleavages
	High	TEFLSFmNTELAAFTK	2	1	1	P31949	M7(Oxidation)	0	0	0.002007	1.50504	2	1865.9	0.866104	137.032	0
	High	NQKDPGVLDR	2	1	1	P31949		0	0.003	0.01359	2.47859	3	1141.6	-0.37279	41.2385	1
O43399	Tumor protein D54 OS=Homo sapiens GN=TPD52L2 PE=1 SV=2 - [TPD54_HUMAN]	6.60817	12.14	1	2	2	3	206	22.2243	5.36377
	A2	Sequence	# PSMs	# Proteins	# Protein Groups	Protein Group Accessions	Modifications	ΔCn	q-Value	PEP	XCorr	Charge	MH+ [Da]	ΔM [ppm]	RT [min]	# Missed Cleavages
	High	TSAALSTVGSAISR	2	1	1	O43399		0	0	0.002323	2.64684	2	1320.71	1.94725	85.1854	0
	High	TQETLSQAGQK	1	1	1	O43399		0	0	0.0005656	1.80305	2	1190.6	-0.5794	34.2559	0
P11586	C-1-tetrahydrofolate synthase, cytoplasmic OS=Homo sapiens GN=MTHFD1 PE=1 SV=3 - [C1TC_HUMAN]	6.49609	3.1	1	2	2	3	935	101.495	7.29834
	A2	Sequence	# PSMs	# Proteins	# Protein Groups	Protein Group Accessions	Modifications	ΔCn	q-Value	PEP	XCorr	Charge	MH+ [Da]	ΔM [ppm]	RT [min]	# Missed Cleavages
	High	TDPTTLTDEEINR	1	1	1	P11586		0	0	0.002074	1.62467	2	1504.71	1.02187	77.2932	0
	High	YVVVTGITPTPLGEGK	2	1	1	P11586		0	0.005	0.01985	2.41887	2	1630.91	3.04154	105.957	0
P61978	Heterogeneous nuclear ribonucleoprotein K OS=Homo sapiens GN=HNRNPK PE=1 SV=1 - [HNRPK_HUMAN]	6.46233	7.78	1	3	3	5	463	50.9444	5.5415
	A2	Sequence	# PSMs	# Proteins	# Protein Groups	Protein Group Accessions	Modifications	ΔCn	q-Value	PEP	XCorr	Charge	MH+ [Da]	ΔM [ppm]	RT [min]	# Missed Cleavages
	High	TDYNASVSVPDSSGPER	2	1	1	P61978		0	0	0.0002974	1.52202	2	1780.8	0.427131	72.165	0
	High	VVLIGGKPDR	1	1	1	P61978		0	0.004	0.01504	2.59407	2	1053.64	-2.59079	55.6047	0
	High	NTDEMVELR	2	1	1	P61978		0	0.008	0.02934	2.19368	2	1106.51	-0.565393	76.7879	0
P29401	Transketolase OS=Homo sapiens GN=TKT PE=1 SV=3 - [TKT_HUMAN]	6.33083	9.47	1	3	3	6	623	67.8347	7.66455
	A2	Sequence	# PSMs	# Proteins	# Protein Groups	Protein Group Accessions	Modifications	ΔCn	q-Value	PEP	XCorr	Charge	MH+ [Da]	ΔM [ppm]	RT [min]	# Missed Cleavages
	High	TSRPENAIIYNNNEDFQVGQAK	2	1	1	P29401		0	0	0.000489	2.49438	3	2508.2	-3.50069	92.2597	0
	High	ILATPPQEDAPSVDIANIR	2	1	1	P29401		0	0	0.0002273	1.86945	2	2020.08	2.01455	110.414	0
	High	LGQSDPAPLQHQMDIYQK	2	1	1	P29401		0	0	0.001767	1.69671	3	2069.02	1.58709	88.3092	0
O00299	Chloride intracellular channel protein 1 OS=Homo sapiens GN=CLIC1 PE=1 SV=4 - [CLIC1_HUMAN]	6.26097	12.45	1	2	2	4	241	26.9057	5.17334
	A2	Sequence	# PSMs	# Proteins	# Protein Groups	Protein Group Accessions	Modifications	ΔCn	q-Value	PEP	XCorr	Charge	MH+ [Da]	ΔM [ppm]	RT [min]	# Missed Cleavages
	High	NSNPALNDNLEK	2	1	1	O00299		0	0	0.0002803	2.44627	2	1328.64	-0.865067	59.7429	0
	High	LAALNPESNTAGLDIFAK	2	1	1	O00299		0	0.002	0.009756	1.37431	2	1844.98	0.946939	130.5	0
Q12906	Interleukin enhancer-binding factor 3 OS=Homo sapiens GN=ILF3 PE=1 SV=3 - [ILF3_HUMAN]	6.21197	3.69	1	3	3	3	894	95.2791	8.76318
	A2	Sequence	# PSMs	# Proteins	# Protein Groups	Protein Group Accessions	Modifications	ΔCn	q-Value	PEP	XCorr	Charge	MH+ [Da]	ΔM [ppm]	RT [min]	# Missed Cleavages
	High	AYAALAALEK	1	1	1	Q12906		0	0.005	0.02272	2.46785	2	1020.57	-0.453914	101.469	0
	High	VLGMDPLPSK	1	1	1	Q12906		0	0.008	0.02865	1.96001	2	1056.58	0.223461	92.9322	0
	High	LFPDTPLALDANK	1	1	1	Q12906		0	0.008	0.02997	1.78411	2	1414.76	-1.63463	118.238	0
P46781	40S ribosomal protein S9 OS=Homo sapiens GN=RPS9 PE=1 SV=3 - [RS9_HUMAN]	6.04898	12.89	1	2	2	3	194	22.5776	10.6528
	A2	Sequence	# PSMs	# Proteins	# Protein Groups	Protein Group Accessions	Modifications	ΔCn	q-Value	PEP	XCorr	Charge	MH+ [Da]	ΔM [ppm]	RT [min]	# Missed Cleavages
	High	KGQGGAGAGDDEEED	2	1	1	P46781		0	0.004	0.01706	1.92313	2	1434.56	1.40456	20.5914	1
	High	SPYGGGRPGR	1	1	1	P46781		0	0.005	0.02015	2.38319	2	1003.51	0.0321236	29.0214	0
O75083	WD repeat-containing protein 1 OS=Homo sapiens GN=WDR1 PE=1 SV=4 - [WDR1_HUMAN]	6.04721	4.13	1	2	2	3	606	66.1519	6.65381
	A2	Sequence	# PSMs	# Proteins	# Protein Groups	Protein Group Accessions	Modifications	ΔCn	q-Value	PEP	XCorr	Charge	MH+ [Da]	ΔM [ppm]	RT [min]	# Missed Cleavages
	High	YAPSGFYIASGDVSGK	2	1	1	O75083		0	0	0.001157	2.08701	2	1618.78	2.34174	103.143	0
	High	YEYQPFAGK	1	1	1	O75083		0	0.009	0.03738	2.07254	2	1102.52	-1.19792	84.6741	0
Q96HE7	ERO1-like protein alpha OS=Homo sapiens GN=ERO1L PE=1 SV=2 - [ERO1A_HUMAN]	5.99984	5.56	1	2	2	3	468	54.3581	5.68115
	A2	Sequence	# PSMs	# Proteins	# Protein Groups	Protein Group Accessions	Modifications	ΔCn	q-Value	PEP	XCorr	Charge	MH+ [Da]	ΔM [ppm]	RT [min]	# Missed Cleavages
	High	LGAVDESLSEETQK	1	1	1	Q96HE7		0	0	0.00217	2.25739	2	1505.73	0.599719	73.4203	0
	High	FDGILTEGEGPR	2	1	1	Q96HE7		0	0.005	0.01921	1.8172	2	1290.63	0.254758	93.7488	0
P06744	Glucose-6-phosphate isomerase OS=Homo sapiens GN=GPI PE=1 SV=4 - [G6PI_HUMAN]	5.96772	2.87	1	2	2	3	558	63.1072	8.32373
	A2	Sequence	# PSMs	# Proteins	# Protein Groups	Protein Group Accessions	Modifications	ΔCn	q-Value	PEP	XCorr	Charge	MH+ [Da]	ΔM [ppm]	RT [min]	# Missed Cleavages
	High	NLVTEDVMR	2	1	1	P06744		0	0.002	0.01006	2.08401	2	1076.54	0.153931	87.7511	0
	High	SPEDLER	1	1	1	P06744		0	0.005	0.02433	1.86479	2	845.4	-0.325879	40.5308	0
Q00839	Heterogeneous nuclear ribonucleoprotein U OS=Homo sapiens GN=HNRNPU PE=1 SV=6 - [HNRPU_HUMAN]	5.64702	4	1	2	2	3	825	90.528	5.99854
	A2	Sequence	# PSMs	# Proteins	# Protein Groups	Protein Group Accessions	Modifications	ΔCn	q-Value	PEP	XCorr	Charge	MH+ [Da]	ΔM [ppm]	RT [min]	# Missed Cleavages
	High	NFILDQTNVSAAAQR	2	1	1	Q00839		0	0	4.565e-08	3.02896	2	1647.85	0.911399	100.316	0
	High	SSGPTSLFAVTVAPPGAR	1	1	1	Q00839		0	0.003	0.01253	1.5789	2	1714.91	1.16795	121.272	0
Q08211	ATP-dependent RNA helicase A OS=Homo sapiens GN=DHX9 PE=1 SV=4 - [DHX9_HUMAN]	5.30665	1.5	1	2	2	2	1270	140.869	6.84424
	A2	Sequence	# PSMs	# Proteins	# Protein Groups	Protein Group Accessions	Modifications	ΔCn	q-Value	PEP	XCorr	Charge	MH+ [Da]	ΔM [ppm]	RT [min]	# Missed Cleavages
	High	MGGEEAEIR	1	1	1	Q08211		0	0	0.0006607	3.23993	2	991.452	0.134499	49.6405	0
	High	YTQVGPDHNR	1	1	1	Q08211		0	0.008	0.02852	2.06672	2	1186.56	0.199706	29.8003	0
P49755	Transmembrane emp24 domain-containing protein 10 OS=Homo sapiens GN=TMED10 PE=1 SV=2 - [TMEDA_HUMAN]	5.24882	9.13	1	2	2	2	219	24.96	7.44482
	A2	Sequence	# PSMs	# Proteins	# Protein Groups	Protein Group Accessions	Modifications	ΔCn	q-Value	PEP	XCorr	Charge	MH+ [Da]	ΔM [ppm]	RT [min]	# Missed Cleavages
	High	IPDQLVILDMK	1	1	1	P49755		0	0	5.351e-05	3.17402	2	1284.72	-0.0538404	130.644	0
	High	LKPLEVELR	1	1	1	P49755		0	0.003	0.01469	2.0748	3	1096.67	0.684929	88.0709	0
P53396	ATP-citrate synthase OS=Homo sapiens GN=ACLY PE=1 SV=3 - [ACLY_HUMAN]	5.00519	2.09	1	2	2	3	1101	120.762	7.32764
	A2	Sequence	# PSMs	# Proteins	# Protein Groups	Protein Group Accessions	Modifications	ΔCn	q-Value	PEP	XCorr	Charge	MH+ [Da]	ΔM [ppm]	RT [min]	# Missed Cleavages
	High	SGGMSNELNNIISR	2	1	1	P53396		0	0	0.0003253	2.60767	2	1491.72	0.574295	109.552	0
	High	LGQEATVGK	1	1	1	P53396		0	0.005	0.01778	1.36739	2	902.494	-0.442427	32.3126	0
Q04446	1,4-alpha-glucan-branching enzyme OS=Homo sapiens GN=GBE1 PE=1 SV=3 - [GLGB_HUMAN]	4.79853	2.71	1	2	2	2	702	80.4226	6.31592
	A2	Sequence	# PSMs	# Proteins	# Protein Groups	Protein Group Accessions	Modifications	ΔCn	q-Value	PEP	XCorr	Charge	MH+ [Da]	ΔM [ppm]	RT [min]	# Missed Cleavages
	High	SGEILYR	1	1	1	Q04446		0	0.003	0.01166	2.35875	2	837.447	0.0710515	63.1133	0
	High	VALILQNVDLPN	1	1	1	Q04446		0	0.008	0.03148	2.43979	2	1308.75	-0.556911	133.131	0
P47756	F-actin-capping protein subunit beta OS=Homo sapiens GN=CAPZB PE=1 SV=4 - [CAPZB_HUMAN]	4.7776	12.27	1	2	2	3	277	31.3308	5.59229
	A2	Sequence	# PSMs	# Proteins	# Protein Groups	Protein Group Accessions	Modifications	ΔCn	q-Value	PEP	XCorr	Charge	MH+ [Da]	ΔM [ppm]	RT [min]	# Missed Cleavages
	High	SGSGTMNLGGSLTR	2	1	1	P47756		0	0	0.0003722	2.62538	2	1337.65	0.283825	79.8266	0
	High	SPWSNKYDPPLEDGAMPSAR	1	1	1	P47756		0	0.008	0.03445	1.59063	3	2218.02	-0.871395	102.075	1
P62753	40S ribosomal protein S6 OS=Homo sapiens GN=RPS6 PE=1 SV=1 - [RS6_HUMAN]	4.71809	9.64	1	2	2	2	249	28.663	10.8433
	A2	Sequence	# PSMs	# Proteins	# Protein Groups	Protein Group Accessions	Modifications	ΔCn	q-Value	PEP	XCorr	Charge	MH+ [Da]	ΔM [ppm]	RT [min]	# Missed Cleavages
	High	LIEVDDER	1	1	1	P62753		0	0.002	0.009787	1.63808	2	988.494	-0.25288	61.3271	0
	High	KGEKDIPGLTDTTVPR	1	1	1	P62753		0	0.003	0.0138	3.08002	3	1726.94	1.63998	79.0617	2
P29966	Myristoylated alanine-rich C-kinase substrate OS=Homo sapiens GN=MARCKS PE=1 SV=4 - [MARCS_HUMAN]	4.65698	6.93	1	2	2	3	332	31.5359	4.44971
	A2	Sequence	# PSMs	# Proteins	# Protein Groups	Protein Group Accessions	Modifications	ΔCn	q-Value	PEP	XCorr	Charge	MH+ [Da]	ΔM [ppm]	RT [min]	# Missed Cleavages
	High	GEAAAERPGEAAVASSPSK	2	1	1	P29966		0	0	5.118e-05	2.56329	3	1784.88	0.326955	43.0712	0
	High	TAAKGEAAAERPGEAAVASSPSK	1	1	1	P29966		0	0.003	0.01466	2.09369	3	2156.09	-1.10302	43.4233	1
P23526	Adenosylhomocysteinase OS=Homo sapiens GN=AHCY PE=1 SV=4 - [SAHH_HUMAN]	4.59547	4.86	1	2	2	2	432	47.6852	6.34131
	A2	Sequence	# PSMs	# Proteins	# Protein Groups	Protein Group Accessions	Modifications	ΔCn	q-Value	PEP	XCorr	Charge	MH+ [Da]	ΔM [ppm]	RT [min]	# Missed Cleavages
	High	VPAINVNDSVTK	1	1	1	P23526		0	0.004	0.0155	2.5971	2	1256.68	-0.0441313	72.9617	0
	High	YPQLLPGIR	1	1	1	P23526		0	0.005	0.02275	1.99837	2	1056.62	-0.614162	114.858	0
P36871	Phosphoglucomutase-1 OS=Homo sapiens GN=PGM1 PE=1 SV=3 - [PGM1_HUMAN]	4.56712	4.8	1	2	2	2	562	61.4105	6.75635
	A2	Sequence	# PSMs	# Proteins	# Protein Groups	Protein Group Accessions	Modifications	ΔCn	q-Value	PEP	XCorr	Charge	MH+ [Da]	ΔM [ppm]	RT [min]	# Missed Cleavages
	High	QEATLVVGGDGR	1	1	1	P36871		0	0.001	0.004064	2.19988	2	1201.62	0.527747	62.2169	0
	High	TQAYQDQKPGTSGLR	1	1	1	P36871		0	0.002	0.009967	2.36724	3	1649.82	-0.134886	48.0366	0
P52272	Heterogeneous nuclear ribonucleoprotein M OS=Homo sapiens GN=HNRNPM PE=1 SV=3 - [HNRPM_HUMAN]	4.55089	3.01	1	2	2	3	730	77.4643	8.70459
	A2	Sequence	# PSMs	# Proteins	# Protein Groups	Protein Group Accessions	Modifications	ΔCn	q-Value	PEP	XCorr	Charge	MH+ [Da]	ΔM [ppm]	RT [min]	# Missed Cleavages
	High	MGPAMGPALGAGIER	2	1	1	P52272		0	0	0.001264	2.8488	2	1427.71	0.731125	98.6847	0
	High	MGQTMER	1	1	1	P52272		0	0.009	0.03737	1.70208	2	852.37	-0.506458	30.8323	0
P25705	ATP synthase subunit alpha, mitochondrial OS=Homo sapiens GN=ATP5A1 PE=1 SV=1 - [ATPA_HUMAN]	4.26223	4.34	1	2	2	2	553	59.7136	9.12939
	A2	Sequence	# PSMs	# Proteins	# Protein Groups	Protein Group Accessions	Modifications	ΔCn	q-Value	PEP	XCorr	Charge	MH+ [Da]	ΔM [ppm]	RT [min]	# Missed Cleavages
	High	VGSAAQTR	1	1	1	P25705		0	0.003	0.01332	1.84994	2	789.421	-0.396738	13.364	0
	High	TGAIVDVPVGEELLGR	1	1	1	P25705		0	0.005	0.01958	2.41229	2	1624.89	-0.232005	128.123	0
P05198	Eukaryotic translation initiation factor 2 subunit 1 OS=Homo sapiens GN=EIF2S1 PE=1 SV=3 - [IF2A_HUMAN]	4.14482	6.98	1	2	2	3	315	36.0894	5.08447
	A2	Sequence	# PSMs	# Proteins	# Protein Groups	Protein Group Accessions	Modifications	ΔCn	q-Value	PEP	XCorr	Charge	MH+ [Da]	ΔM [ppm]	RT [min]	# Missed Cleavages
	High	VVTDTDETELAR	2	1	1	P05198		0	0	1.638e-05	2.08969	2	1348.66	-0.109853	61.4769	0
	High	YVMTTTTLER	1	1	1	P05198		0	0.008	0.03579	2.05514	2	1214.61	-0.521605	79.178	0
Q14847	LIM and SH3 domain protein 1 OS=Homo sapiens GN=LASP1 PE=1 SV=2 - [LASP1_HUMAN]	4.1373	15.71	1	3	3	4	261	29.6982	7.04932
	A2	Sequence	# PSMs	# Proteins	# Protein Groups	Protein Group Accessions	Modifications	ΔCn	q-Value	PEP	XCorr	Charge	MH+ [Da]	ΔM [ppm]	RT [min]	# Missed Cleavages
	High	QSFTMVADTPENLR	2	1	1	Q14847		0	0.002	0.01007	2.02967	2	1608.77	1.29804	101.493	0
	High	GFSVVADTPELQR	1	1	1	Q14847		0	0.003	0.01468	2.10763	2	1418.73	4.28326	100.551	0
	High	MGPSGGEGMEPERR	1	1	1	Q14847		0	0.008	0.02752	1.762	3	1489.65	-1.0545	49.2925	1
P55072	Transitional endoplasmic reticulum ATPase OS=Homo sapiens GN=VCP PE=1 SV=4 - [TERA_HUMAN]	3.92677	2.11	1	2	2	2	806	89.2657	5.26221
	A2	Sequence	# PSMs	# Proteins	# Protein Groups	Protein Group Accessions	Modifications	ΔCn	q-Value	PEP	XCorr	Charge	MH+ [Da]	ΔM [ppm]	RT [min]	# Missed Cleavages
	High	MDELQLFR	1	1	1	P55072		0	0.003	0.01302	1.98684	2	1051.53	3.19737	121.011	0
	High	RSVSDNDIR	1	1	1	P55072		0	0.009	0.03713	1.93992	2	1061.53	-0.888337	30.7481	1
P26599	Polypyrimidine tract-binding protein 1 OS=Homo sapiens GN=PTBP1 PE=1 SV=1 - [PTBP1_HUMAN]	3.82364	5.27	1	2	2	2	531	57.1856	9.17334
	A2	Sequence	# PSMs	# Proteins	# Protein Groups	Protein Group Accessions	Modifications	ΔCn	q-Value	PEP	XCorr	Charge	MH+ [Da]	ΔM [ppm]	RT [min]	# Missed Cleavages
	High	TDSSPNQAR	1	1	1	P26599		0	0.005	0.01955	1.73107	2	975.449	-0.154967	13.5275	0
	High	EGQEDQGLTKDYGNSPLHR	1	1	1	P26599		0	0.008	0.02996	2.09257	3	2144	-2.1262	69.8758	1
Q9H299	SH3 domain-binding glutamic acid-rich-like protein 3 OS=Homo sapiens GN=SH3BGRL3 PE=1 SV=1 - [SH3L3_HUMAN]	3.78443	19.35	1	2	2	2	93	10.4313	4.93213
	A2	Sequence	# PSMs	# Proteins	# Protein Groups	Protein Group Accessions	Modifications	ΔCn	q-Value	PEP	XCorr	Charge	MH+ [Da]	ΔM [ppm]	RT [min]	# Missed Cleavages
	High	SQQSEVTR	1	1	1	Q9H299		0	0.001	0.007171	1.69269	2	934.459	-0.100022	18.294	0
	High	VYSTSVTGSR	1	1	1	Q9H299		0	0.002	0.009976	2.09173	2	1056.53	-1.51268	44.3439	0
P14314	Glucosidase 2 subunit beta OS=Homo sapiens GN=PRKCSH PE=1 SV=2 - [GLU2B_HUMAN]	2.91255	3.79	1	2	2	3	528	59.3878	4.41162
	A2	Sequence	# PSMs	# Proteins	# Protein Groups	Protein Group Accessions	Modifications	ΔCn	q-Value	PEP	XCorr	Charge	MH+ [Da]	ΔM [ppm]	RT [min]	# Missed Cleavages
	High	SLEDQVEMLR	1	1	1	P14314		0	0	6.935e-05	2.91255	2	1219.6	-2.58499	106.643	0
	High	SLKDMEESIR	2	1	1	P14314		0	0.003	0.01464	1.60118	3	1207.6	-1.23189	84.4067	1
P06396	Gelsolin OS=Homo sapiens GN=GSN PE=1 SV=1 - [GELS_HUMAN]	1.99464	7.16	1	3	3	3	782	85.6442	6.27783
	A2	Sequence	# PSMs	# Proteins	# Protein Groups	Protein Group Accessions	Modifications	ΔCn	q-Value	PEP	XCorr	Charge	MH+ [Da]	ΔM [ppm]	RT [min]	# Missed Cleavages
	High	VPFDAATLHTSTAMAAQHGMDDDGTGQK	1	1	1	P06396		0	0.004	0.01646	2.32787	4	2873.29	2.14875	97.8416	0
	High	QTQVSVLPEGGETPLFK	1	1	1	P06396		0	0.005	0.02139	1.99464	2	1829.96	-1.0882	117.797	0
	High	HVVPNEVVVQR	1	1	1	P06396		0	0.008	0.03307	1.3369	2	1275.72	0.186024	59.0284	0
Q99497	Protein deglycase DJ-1 OS=Homo sapiens GN=PARK7 PE=1 SV=2 - [PARK7_HUMAN]	1.6092	12.17	1	2	2	3	189	19.8785	6.78564
	A2	Sequence	# PSMs	# Proteins	# Protein Groups	Protein Group Accessions	Modifications	ΔCn	q-Value	PEP	XCorr	Charge	MH+ [Da]	ΔM [ppm]	RT [min]	# Missed Cleavages
	High	GAEEMETVIPVDVMR	2	1	1	Q99497		0	0	0.001843	1.54297	2	1675.8	0.331283	124.324	0
	High	DGLILTSR	1	1	1	Q99497		0	0.007	0.02645	1.6092	2	874.499	-0.12372	79.5734	0

## Sheet: antisense
Accession	Description	Score	Coverage	# Proteins	# Unique Peptides	# Peptides	# PSMs	# AAs	MW [kDa]	calc. pI
P60709	Actin, cytoplasmic 1 OS=Homo sapiens GN=ACTB PE=1 SV=1 - [ACTB_HUMAN]	42.0554	29.6	2	9	9	29	375	41.7097	5.47803
	A2	Sequence	# PSMs	# Proteins	# Protein Groups	Protein Group Accessions	Modifications	ΔCn	q-Value	PEP	XCorr	Charge	MH+ [Da]	ΔM [ppm]	RT [min]	# Missed Cleavages
	High	AGFAGDDAPR	3	2	1	P60709		0	0	0.0002096	2.77453	2	976.448	-0.188012	53.1478	0
	High	VAPEEHPVLLTEAPLNPK	3	2	1	P60709		0	0	0.001004	2.76607	3	1954.06	0.0240588	97.6292	0
	High	DLYANTVLSGGTTmYPGIADR	3	2	1	P60709	M14(Oxidation)	0	0	3.813e-07	2.3466	2	2231.07	0.119605	117.516	0
	High	GYSFTTTAER	3	2	1	P60709		0	0	1.975e-05	2.34606	2	1132.53	-0.698133	74.9281	0
	High	QEYDESGPSIVHR	6	2	1	P60709		0	0	0.008738	1.96881	3	1516.7	-0.449197	62.3531	0
	High	DSYVGDEAQSK	2	2	1	P60709		0	0.005	0.008738	2.18714	2	1198.52	-1.54187	42.238	0
	High	EITALAPSTmK	2	2	1	P60709	M10(Oxidation)	0	0.005	0.008738	2.14865	2	1177.61	0.0718564	79.9037	0
	High	EITALAPSTMK	2	2	1	P60709		0	0.005	0.008738	2.06543	2	1161.62	0.319135	79.9377	0
	High	SYELPDGQVITIGNER	2	2	1	P60709		0	0.005	0.01057	1.92676	2	1790.89	0.76322	122.844	0
	High	DSYVGDEAQSKR	3	2	1	P60709		0	0.006	0.02576	2.03305	3	1354.62	-0.0111447	40.7851	1
P04264	Keratin, type II cytoskeletal 1 OS=Homo sapiens GN=KRT1 PE=1 SV=6 - [K2C1_HUMAN]	36.4535	15.37	1	10	10	17	644	65.999	8.11865
	A2	Sequence	# PSMs	# Proteins	# Protein Groups	Protein Group Accessions	Modifications	ΔCn	q-Value	PEP	XCorr	Charge	MH+ [Da]	ΔM [ppm]	RT [min]	# Missed Cleavages
	High	YEELQITAGR	4	1	1	P04264		0	0	0.0002432	3.00873	2	1179.6	-0.483372	83.2513	0
	High	TNAENEFVTIKK	2	1	1	P04264		0	0	0.002261	2.59037	3	1393.73	-0.189099	72.8821	1
	High	GGSGGGGGGSSGGR	1	1	1	P04264		0	0	0.002292	2.29499	2	1006.43	-0.0160977	10.4675	0
	High	AEAESLYQSK	2	1	1	P04264		0	0	0.008642	2.27404	2	1125.54	-0.431485	54.5962	0
	High	TNAENEFVTIK	2	1	1	P04264		0	0	0.006519	2.15752	2	1265.64	-0.487519	86.6222	0
	High	FLEQQNQVLQTK	2	1	1	P04264		0	0.005	0.008738	2.36205	2	1475.79	0.747569	78.112	0
	High	SISISVAR	1	1	1	P04264		0	0.005	0.009962	1.89837	2	832.489	0.32305	72.4633	0
	High	GSGGGSSGGSIGGR	1	1	1	P04264		0	0.005	0.008738	1.72081	2	1092.5	-0.610008	21.6279	0
	High	NKYEDEINKR	1	1	1	P04264		0	0.006	0.03527	1.74697	3	1308.65	0.209274	54.3525	2
	High	AQYEDIAQK	1	1	1	P04264		0	0.006	0.04438	1.65866	2	1065.52	0.930084	53.001	0
P14618	Pyruvate kinase PKM OS=Homo sapiens GN=PKM PE=1 SV=4 - [KPYM_HUMAN]	29.5819	12.43	1	7	7	13	531	57.9	7.84033
	A2	Sequence	# PSMs	# Proteins	# Protein Groups	Protein Group Accessions	Modifications	ΔCn	q-Value	PEP	XCorr	Charge	MH+ [Da]	ΔM [ppm]	RT [min]	# Missed Cleavages
	High	LDIDSPPITAR	5	1	1	P14618		0	0	4.496e-05	3.09665	2	1197.65	-0.555411	88.2713	0
	High	APIIAVTR	2	1	1	P14618		0	0	0.003685	2.81806	2	840.53	-0.66821	68.929	0
	High	GDYPLEAVR	2	1	1	P14618		0	0	0.008738	1.96037	2	1019.52	-0.307869	84.4527	0
	High	NTGIIcTIGPASR	1	1	1	P14618	C6(Carbamidomethyl)	0	0.005	0.01037	2.81493	2	1359.7	-4.64758	85.4314	0
	High	SGMNVAR	1	1	1	P14618		0	0.005	0.008738	2.08555	2	734.362	0.506113	31.8289	0
	High	GDLGIEIPAEK	1	1	1	P14618		0	0.006	0.04536	1.99767	2	1141.61	-1.36234	96.7785	0
	High	MQHLIAR	1	1	1	P14618		0	0.006	0.04748	1.64687	2	868.482	-0.546066	45.7064	0
P08670	Vimentin OS=Homo sapiens GN=VIM PE=1 SV=4 - [VIME_HUMAN]	29.3681	31.76	1	13	13	19	466	53.6191	5.12256
	A2	Sequence	# PSMs	# Proteins	# Protein Groups	Protein Group Accessions	Modifications	ΔCn	q-Value	PEP	XCorr	Charge	MH+ [Da]	ΔM [ppm]	RT [min]	# Missed Cleavages
	High	LLQDSVDFSLADAINTEFK	1	1	1	P08670		0	0	0.0001214	3.5086	2	2126.08	4.79557	140.742	0
	High	TNEKVELQELNDR	3	1	1	P08670		0	0	0.002478	2.95582	2	1587.8	1.64571	73.9251	1
	High	NLQEAEEWYK	2	1	1	P08670		0	0	0.008339	2.282	2	1309.61	1.34568	100.498	0
	High	VEVERDNLAEDIMR	1	1	1	P08670		0	0	0.008738	2.17635	3	1688.83	-0.54604	102.512	1
	High	EYQDLLNVK	2	1	1	P08670		0	0.005	0.009679	1.98151	2	1121.58	0.14141	96.5879	0
	High	LLEGEESR	1	1	1	P08670		0	0.005	0.008738	1.84806	2	932.468	-0.360466	42.3429	0
	High	DGQVINETSQHHDDLE	1	1	1	P08670		0	0.005	0.01133	1.73842	3	1836.8	0.328133	60.7173	0
	High	SLYASSPGGVYATR	1	1	1	P08670		0	0.005	0.008738	1.42725	2	1428.71	0.276124	79.8605	0
	High	QQYESVAAK	2	1	1	P08670		0	0.005	0.009378	0.906792	2	1023.51	-0.273368	38.1024	0
	High	ILLAELEQLK	1	1	1	P08670		0	0.006	0.0363	2.36128	2	1169.71	-0.855771	132.291	0
	High	FADLSEAANR	1	1	1	P08670		0	0.006	0.02384	2.19302	2	1093.53	0.0640576	70.9851	0
	High	FADLSEAANRNNDALR	1	1	1	P08670		0	0.006	0.01515	1.82483	3	1776.86	-0.332463	80.0955	1
	High	QDVDNASLAR	2	1	1	P08670		0	0.006	0.01481	1.79598	2	1088.53	-0.899568	44.8268	0
P00338	L-lactate dehydrogenase A chain OS=Homo sapiens GN=LDHA PE=1 SV=2 - [LDHA_HUMAN]	23.0165	22.89	1	7	7	12	332	36.6654	8.26514
	A2	Sequence	# PSMs	# Proteins	# Protein Groups	Protein Group Accessions	Modifications	ΔCn	q-Value	PEP	XCorr	Charge	MH+ [Da]	ΔM [ppm]	RT [min]	# Missed Cleavages
	High	LVIITAGAR	1	1	1	P00338		0	0.005	0.008738	2.49946	2	913.583	-0.520156	80.9666	0
	High	VTLTSEEEAR	4	1	1	P00338		0	0.005	0.008738	2.44852	2	1134.56	0.544133	54.9341	0
	High	VIGSGcNLDSAR	2	1	1	P00338	C6(Carbamidomethyl)	0	0.005	0.008738	1.77581	2	1248.6	0.0737028	58.4984	0
	High	DYNVTANSK	2	1	1	P00338		0	0.005	0.01111	1.75863	2	1011.47	-1.10852	40.7137	0
	High	DLADELALVDVIEDK	1	1	1	P00338		0	0.006	0.0119	2.17659	2	1657.85	-0.205385	141.714	0
	High	SADTLWGIQK	1	1	1	P00338		0	0.006	0.04637	1.91195	2	1118.58	-0.716753	100.264	0
	High	QVVESAYEVIK	1	1	1	P00338		0	0.006	0.01842	1.88044	2	1264.68	-0.578326	90.416	0
P07355	Annexin A2 OS=Homo sapiens GN=ANXA2 PE=1 SV=2 - [ANXA2_HUMAN]	20.825	15.34	1	5	5	8	339	38.5798	7.75244
	A2	Sequence	# PSMs	# Proteins	# Protein Groups	Protein Group Accessions	Modifications	ΔCn	q-Value	PEP	XCorr	Charge	MH+ [Da]	ΔM [ppm]	RT [min]	# Missed Cleavages
	High	TPAQYDASELK	2	1	1	P07355		0	0	0.006518	2.99843	2	1222.59	-0.226681	64.5788	0
	High	TPAQYDASELKASMK	1	1	1	P07355		0	0	0.00245	2.59879	3	1639.8	0.809371	79.6045	1
	High	TNQELQEINR	2	1	1	P07355		0	0	0.003089	2.55397	2	1244.62	-0.807843	60.1271	0
	High	LSLEGDHSTPPSAYGSVK	1	1	1	P07355		0	0.005	0.008738	2.44622	3	1844.9	-0.0939874	78.6796	0
	High	QDIAFAYQR	2	1	1	P07355		0	0.005	0.008762	2.34638	2	1111.55	-1.40347	85.7336	0
P11021	78 kDa glucose-regulated protein OS=Homo sapiens GN=HSPA5 PE=1 SV=2 - [GRP78_HUMAN]	20.3762	7.95	1	3	4	10	654	72.2884	5.16064
	A2	Sequence	# PSMs	# Proteins	# Protein Groups	Protein Group Accessions	Modifications	ΔCn	q-Value	PEP	XCorr	Charge	MH+ [Da]	ΔM [ppm]	RT [min]	# Missed Cleavages
	High	NQLTSNPENTVFDAK	2	1	1	P11021		0	0	2.249e-05	2.80174	2	1677.81	0.574672	90.6993	0
	High	VEIIANDQGNR	4	2	2	P11021;P11142		0	0	0.001477	2.54196	2	1228.63	-0.796422	55.399	0
	High	TWNDPSVQQDIK	2	1	1	P11021		0	0.005	0.008738	2.35329	2	1430.69	-0.34385	82.268	0
	High	ITPSYVAFTPEGER	2	1	1	P11021		0	0.005	0.008769	1.86363	2	1566.78	0.651072	102.646	0
P11142	Heat shock cognate 71 kDa protein OS=Homo sapiens GN=HSPA8 PE=1 SV=1 - [HSP7C_HUMAN]	20.0049	10.37	1	4	5	10	646	70.8542	5.51611
	A2	Sequence	# PSMs	# Proteins	# Protein Groups	Protein Group Accessions	Modifications	ΔCn	q-Value	PEP	XCorr	Charge	MH+ [Da]	ΔM [ppm]	RT [min]	# Missed Cleavages
	High	NQVAMNPTNTVFDAK	2	1	1	P11142		0	0	0.006532	3.02167	2	1649.8	0.341052	92.4211	0
	High	DAGTIAGLNVLR	2	1	1	P11142		0	0	0.008738	2.58244	2	1199.67	-0.990268	111.312	0
	High	VEIIANDQGNR	4	2	2	P11021;P11142		0	0	0.001477	2.54196	2	1228.63	-0.796422	55.399	0
	High	STAGDTHLGGEDFDNR	1	1	1	P11142		0	0.005	0.009347	2.00858	3	1691.73	-0.0965171	64.8404	0
	High	TTPSYVAFTDTER	1	1	1	P11142		0	0.005	0.008738	1.23324	2	1487.7	0.348541	93.7192	0
P35527	Keratin, type I cytoskeletal 9 OS=Homo sapiens GN=KRT9 PE=1 SV=3 - [K1C9_HUMAN]	16.9051	14.77	1	7	7	12	623	62.0268	5.23682
	A2	Sequence	# PSMs	# Proteins	# Protein Groups	Protein Group Accessions	Modifications	ΔCn	q-Value	PEP	XCorr	Charge	MH+ [Da]	ΔM [ppm]	RT [min]	# Missed Cleavages
	High	SGGGGGGGLGSGGSIR	3	1	1	P35527		0	0	2.146e-05	2.53265	2	1232.6	0.343097	48.7101	0
	High	FSSSSGYGGGSSR	1	1	1	P35527		0	0	0.00107	1.87076	2	1235.53	0.768403	42.1276	0
	High	GGSGGSYGGGGSGGGYGGGSGSR	2	1	1	P35527		0	0	0.00374	1.51476	2	1791.73	0.425245	41.1214	0
	High	STMQELNSR	1	1	1	P35527		0	0.005	0.008738	1.85804	2	1065.5	0.854471	50.4345	0
	High	FSSSGGGGGGGR	1	1	1	P35527		0	0.005	0.008738	1.7141	2	982.433	-1.11612	19.4946	0
	High	QVLDNLTMEK	2	1	1	P35527		0	0.005	0.008738	1.54019	2	1190.61	-0.138806	86.48	0
	High	TLLDIDNTR	1	1	1	P35527		0	0.006	0.0429	1.98482	2	1060.56	0.0384616	90.0137	0
	High	STmQELNSR	1	1	1	P35527	M3(Oxidation)	0	0.006	0.02234	1.95728	2	1081.49	-1.34152	50.9168	0
P02768	Serum albumin OS=Homo sapiens GN=ALB PE=1 SV=2 - [ALBU_HUMAN]	16.6366	4.6	1	3	3	9	609	69.3215	6.27783
	A2	Sequence	# PSMs	# Proteins	# Protein Groups	Protein Group Accessions	Modifications	ΔCn	q-Value	PEP	XCorr	Charge	MH+ [Da]	ΔM [ppm]	RT [min]	# Missed Cleavages
	High	KVPQVSTPTLVEVSR	5	1	1	P02768		0	0	0.002848	3.43255	3	1639.94	-1.25442	89.1651	1
	High	VPQVSTPTLVEVSR	2	1	1	P02768		0	0	0.00541	2.02604	2	1511.84	0.545181	95.9318	0
	High	DVFLGmFLYEYAR	2	1	1	P02768	M6(Oxidation)	0	0.005	0.008738	2.49947	2	1639.79	6.08112	141.907	0
P04083	Annexin A1 OS=Homo sapiens GN=ANXA1 PE=1 SV=2 - [ANXA1_HUMAN]	14.5724	11.85	1	3	3	6	346	38.69	7.02002
	A2	Sequence	# PSMs	# Proteins	# Protein Groups	Protein Group Accessions	Modifications	ΔCn	q-Value	PEP	XCorr	Charge	MH+ [Da]	ΔM [ppm]	RT [min]	# Missed Cleavages
	High	GDRSEDFGVNEDLADSDAR	2	1	1	P04083		0	0	0.0009476	2.95503	3	2067.89	0.0854779	85.6746	1
	High	DITSDTSGDFR	2	1	1	P04083		0	0	0.004723	2.41481	2	1213.53	-1.25871	72.9531	0
	High	TPAQFDADELR	2	1	1	P04083		0	0.005	0.008738	2.42855	2	1262.6	2.43492	85.2121	0
P21333	Filamin-A OS=Homo sapiens GN=FLNA PE=1 SV=4 - [FLNA_HUMAN]	13.7978	2.38	1	4	4	6	2647	280.564	6.06201
	A2	Sequence	# PSMs	# Proteins	# Protein Groups	Protein Group Accessions	Modifications	ΔCn	q-Value	PEP	XCorr	Charge	MH+ [Da]	ΔM [ppm]	RT [min]	# Missed Cleavages
	High	GAGTGGLGLAVEGPSEAK	2	1	1	P21333		0	0	0.0005905	3.09335	2	1570.81	0.353676	86.2396	0
	High	VANPSGNLTETYVQDR	2	1	1	P21333		0	0	0.004826	2.37113	2	1763.86	0.0415737	83.3394	0
	High	YGGQPVPNFPSK	1	1	1	P21333		0	0.005	0.008738	2.16033	2	1290.65	0.18248	80.525	0
	High	VTAQGPGLEPSGNIANK	1	1	1	P21333		0	0.006	0.01369	1.84656	2	1652.86	1.45638	66.9207	0
P13645	Keratin, type I cytoskeletal 10 OS=Homo sapiens GN=KRT10 PE=1 SV=6 - [K1C10_HUMAN]	12.0813	8.39	1	5	5	7	584	58.7917	5.21143
	A2	Sequence	# PSMs	# Proteins	# Protein Groups	Protein Group Accessions	Modifications	ΔCn	q-Value	PEP	XCorr	Charge	MH+ [Da]	ΔM [ppm]	RT [min]	# Missed Cleavages
	High	ALEESNYELEGK	1	1	1	P13645		0	0	0.0034	2.34772	2	1381.65	-0.427528	73.7331	0
	High	DAEAWFNEK	2	1	1	P13645		0	0.005	0.008738	2.42138	2	1109.49	-0.730092	102.602	0
	High	VTmQNLNDR	1	1	1	P13645	M3(Oxidation)	0	0.005	0.009717	1.50836	2	1106.53	-0.229489	59.2376	0
	High	VTMQNLNDR	1	1	1	P13645		0	0.006	0.02282	1.78877	2	1090.53	0.141425	58.9682	0
	High	LAADDFR	1	1	1	P13645		0	0.006	0.01824	1.6524	2	807.399	-1.1433	66.6058	0
	High	SQYEQLAEQNRK	1	1	1	P13645		0	0.006	0.01283	1.60532	2	1493.74	1.52541	54.228	1
P04406	Glyceraldehyde-3-phosphate dehydrogenase OS=Homo sapiens GN=GAPDH PE=1 SV=3 - [G3P_HUMAN]	11.6576	12.24	1	3	3	6	335	36.0304	8.45557
	A2	Sequence	# PSMs	# Proteins	# Protein Groups	Protein Group Accessions	Modifications	ΔCn	q-Value	PEP	XCorr	Charge	MH+ [Da]	ΔM [ppm]	RT [min]	# Missed Cleavages
	High	VVDLMAHMASKE	2	1	1	P04406		0	0	1.818e-05	3.18393	2	1330.65	-0.726113	89.8976	1
	High	GALQNIIPASTGAAK	3	1	1	P04406		0	0	1.165e-07	3.04722	2	1411.79	0.101745	96.4093	0
	High	VPTANVSVVDLTcR	1	1	1	P04406	C13(Carbamidomethyl)	0	0.006	0.01678	1.33088	2	1530.8	0.369902	98.9376	0
P68104	Elongation factor 1-alpha 1 OS=Homo sapiens GN=EEF1A1 PE=1 SV=1 - [EF1A1_HUMAN]	11.0334	9.52	2	3	3	5	462	50.1091	9.01221
	A2	Sequence	# PSMs	# Proteins	# Protein Groups	Protein Group Accessions	Modifications	ΔCn	q-Value	PEP	XCorr	Charge	MH+ [Da]	ΔM [ppm]	RT [min]	# Missed Cleavages
	High	VETGVLKPGMVVTFAPVNVTTEVK	2	2	1	P68104		0	0	0.0008459	3.25513	3	2515.38	-0.765291	130.273	0
	High	IGGIGTVPVGR	1	2	1	P68104		0	0	2.48e-05	3.18177	2	1025.61	-0.232398	78.4147	0
	High	VETGVLKPGmVVTFAPVNVTTEVK	1	2	1	P68104	M10(Oxidation)	0	0	0.008738	2.56635	3	2531.38	0.645546	118.001	0
	High	QTVAVGVIK	1	2	1	P68104		0	0.006	0.05125	1.16433	2	914.567	0.0129735	66.9637	0
P07237	Protein disulfide-isomerase OS=Homo sapiens GN=P4HB PE=1 SV=3 - [PDIA1_HUMAN]	10.2184	7.87	1	3	3	4	508	57.0807	4.86865
	A2	Sequence	# PSMs	# Proteins	# Protein Groups	Protein Group Accessions	Modifications	ΔCn	q-Value	PEP	XCorr	Charge	MH+ [Da]	ΔM [ppm]	RT [min]	# Missed Cleavages
	High	VDATEESDLAQQYGVR	2	1	1	P07237		0	0	5.019e-07	3.25434	2	1780.84	0.899622	97.2625	0
	High	YKPESEELTAER	1	1	1	P07237		0	0	0.004581	2.36806	3	1451.7	-1.95036	58.999	0
	High	MDSTANEVEAVK	1	1	1	P07237		0	0.005	0.01148	1.98965	2	1293.6	1.31136	59.7996	0
P02545	Prelamin-A/C OS=Homo sapiens GN=LMNA PE=1 SV=1 - [LMNA_HUMAN]	8.9833	7.23	1	4	4	7	664	74.0947	7.02002
	A2	Sequence	# PSMs	# Proteins	# Protein Groups	Protein Group Accessions	Modifications	ΔCn	q-Value	PEP	XCorr	Charge	MH+ [Da]	ΔM [ppm]	RT [min]	# Missed Cleavages
	High	SGAQASSTPLSPTR	2	1	1	P02545		0	0.005	0.008738	1.97322	2	1359.69	0.438297	48.2474	0
	High	TALINSTGEEVAMR	2	1	1	P02545		0	0.005	0.008742	1.72238	2	1491.75	0.0742431	86.1222	0
	High	ITESEEVVSR	2	1	1	P02545		0	0.006	0.02515	1.87589	2	1148.58	-0.759626	52.7382	0
	High	SLETENAGLR	1	1	1	P02545		0	0.006	0.0531	1.60313	2	1089.55	-1.13589	59.7839	0
P38646	Stress-70 protein, mitochondrial OS=Homo sapiens GN=HSPA9 PE=1 SV=2 - [GRP75_HUMAN]	8.41248	5.15	1	3	3	4	679	73.6348	6.16357
	A2	Sequence	# PSMs	# Proteins	# Protein Groups	Protein Group Accessions	Modifications	ΔCn	q-Value	PEP	XCorr	Charge	MH+ [Da]	ΔM [ppm]	RT [min]	# Missed Cleavages
	High	DAGQISGLNVLR	1	1	1	P38646		0	0.005	0.01081	2.47478	2	1242.68	-1.11273	103.919	0
	High	VLENAEGAR	2	1	1	P38646		0	0.005	0.009801	2.2074	2	958.496	0.568467	35.524	0
	High	TTPSVVAFTADGER	1	1	1	P38646		0	0.006	0.01619	1.96989	2	1450.72	0.765199	92.8659	0
P07900	Heat shock protein HSP 90-alpha OS=Homo sapiens GN=HSP90AA1 PE=1 SV=5 - [HS90A_HUMAN]	8.22472	4.64	1	3	3	6	732	84.6067	5.021
	A2	Sequence	# PSMs	# Proteins	# Protein Groups	Protein Group Accessions	Modifications	ΔCn	q-Value	PEP	XCorr	Charge	MH+ [Da]	ΔM [ppm]	RT [min]	# Missed Cleavages
	High	GVVDSEDLPLNISR	2	1	1	P07900		0	0	7.637e-05	2.30568	2	1513.79	0.290075	108.08	0
	High	DQVANSAFVER	2	1	1	P07900		0	0.005	0.008738	2.17025	2	1235.6	0.83794	67.6493	0
	High	YIDQEELNK	2	1	1	P07900		0	0.006	0.02105	1.46818	2	1151.56	-0.231438	60.21	0
P10809	60 kDa heat shock protein, mitochondrial OS=Homo sapiens GN=HSPD1 PE=1 SV=2 - [CH60_HUMAN]	7.91019	5.24	1	2	2	4	573	61.0164	5.87158
	A2	Sequence	# PSMs	# Proteins	# Protein Groups	Protein Group Accessions	Modifications	ΔCn	q-Value	PEP	XCorr	Charge	MH+ [Da]	ΔM [ppm]	RT [min]	# Missed Cleavages
	High	ALmLQGVDLLADAVAVTmGPK	2	1	1	P10809	M3(Oxidation); M18(Oxidation)	0	0	6.085e-07	2.97853	3	2145.13	1.74469	141.861	0
	High	VTDALNATR	2	1	1	P10809		0	0.005	0.008833	2.25513	2	960.511	-0.274421	47.1587	0
P37802	Transgelin-2 OS=Homo sapiens GN=TAGLN2 PE=1 SV=3 - [TAGL2_HUMAN]	6.12942	11.06	1	2	2	3	199	22.3772	8.25049
	A2	Sequence	# PSMs	# Proteins	# Protein Groups	Protein Group Accessions	Modifications	ΔCn	q-Value	PEP	XCorr	Charge	MH+ [Da]	ΔM [ppm]	RT [min]	# Missed Cleavages
	High	NVIGLQMGTNR	1	1	1	P37802		0	0.005	0.01129	2.13612	2	1202.63	0.565565	88.2039	0
	High	NFSDNQLQEGK	2	1	1	P37802		0	0.005	0.008738	1.70389	2	1279.59	1.03757	61.053	0
P14625	Endoplasmin OS=Homo sapiens GN=HSP90B1 PE=1 SV=1 - [ENPL_HUMAN]	4.76172	2.99	1	2	2	3	803	92.4113	4.84326
	A2	Sequence	# PSMs	# Proteins	# Protein Groups	Protein Group Accessions	Modifications	ΔCn	q-Value	PEP	XCorr	Charge	MH+ [Da]	ΔM [ppm]	RT [min]	# Missed Cleavages
	High	GVVDSDDLPLNVSR	2	1	1	P14625		0	0	4.464e-05	2.48709	2	1485.76	1.47945	98.8171	0
	High	EAESSPFVER	1	1	1	P14625		0	0.006	0.03694	1.30509	2	1150.54	0.18776	66.7341	0
P06733	Alpha-enolase OS=Homo sapiens GN=ENO1 PE=1 SV=2 - [ENOA_HUMAN]	3.97505	7.83	1	3	3	3	434	47.1393	7.38623
	A2	Sequence	# PSMs	# Proteins	# Protein Groups	Protein Group Accessions	Modifications	ΔCn	q-Value	PEP	XCorr	Charge	MH+ [Da]	ΔM [ppm]	RT [min]	# Missed Cleavages
	High	LMIEMDGTENK	1	1	1	P06733		0	0.005	0.008738	2.34658	2	1280.59	0.0374355	86.4987	0
	High	GNPTVEVDLFTSK	1	1	1	P06733		0	0.005	0.008738	1.62847	2	1406.72	0.421672	111.707	0
	High	IGAEVYHNLK	1	1	1	P06733		0	0.006	0.0119	1.07226	3	1143.61	-0.769506	64.0814	0
Q9BQE3	Tubulin alpha-1C chain OS=Homo sapiens GN=TUBA1C PE=1 SV=1 - [TBA1C_HUMAN]	3.96801	6.24	5	2	2	2	449	49.8635	5.09717
	A2	Sequence	# PSMs	# Proteins	# Protein Groups	Protein Group Accessions	Modifications	ΔCn	q-Value	PEP	XCorr	Charge	MH+ [Da]	ΔM [ppm]	RT [min]	# Missed Cleavages
	High	DVNAAIATIK	1	5	1	Q9BQE3		0	0.005	0.008738	1.9907	2	1015.58	-0.958266	83.7996	0
	High	VGINYQPPTVVPGGDLAK	1	5	1	Q9BQE3		0	0.005	0.008738	1.9773	2	1824.99	0.0723304	105.482	0
P35579	Myosin-9 OS=Homo sapiens GN=MYH9 PE=1 SV=4 - [MYH9_HUMAN]	3.95203	1.68	1	2	2	3	1960	226.392	5.60498
	A2	Sequence	# PSMs	# Proteins	# Protein Groups	Protein Group Accessions	Modifications	ΔCn	q-Value	PEP	XCorr	Charge	MH+ [Da]	ΔM [ppm]	RT [min]	# Missed Cleavages
	High	ELEDATETADAMNR	2	1	1	P35579		0	0	0.001246	1.94561	2	1565.68	0.995033	72.2282	0
	High	QAQQERDELADEIANSSGK	1	1	1	P35579		0	0.005	0.008738	1.82477	3	2088.98	0.385543	85.3291	1
P22626	Heterogeneous nuclear ribonucleoproteins A2/B1 OS=Homo sapiens GN=HNRNPA2B1 PE=1 SV=2 - [ROA2_HUMAN]	1.87105	7.08	1	2	2	2	353	37.4067	8.95361
	A2	Sequence	# PSMs	# Proteins	# Protein Groups	Protein Group Accessions	Modifications	ΔCn	q-Value	PEP	XCorr	Charge	MH+ [Da]	ΔM [ppm]	RT [min]	# Missed Cleavages
	High	GGNFGFGDSR	1	1	1	P22626		0	0.006	0.0244	1.87105	2	1013.44	0.540825	78.4734	0
	High	GGGGNFGPGPGSNFR	1	1	1	P22626		0	0.006	0.05197	1.10852	2	1377.63	-2.98157	77.7308	0
P00558	Phosphoglycerate kinase 1 OS=Homo sapiens GN=PGK1 PE=1 SV=3 - [PGK1_HUMAN]	1.74549	9.11	1	4	4	4	417	44.5861	8.104
	A2	Sequence	# PSMs	# Proteins	# Protein Groups	Protein Group Accessions	Modifications	ΔCn	q-Value	PEP	XCorr	Charge	MH+ [Da]	ΔM [ppm]	RT [min]	# Missed Cleavages
	High	NNQITNNQR	1	1	1	P00558		0	0.005	0.008738	1.46699	2	1101.54	0.00642737	22.1408	0
	High	ELNYFAK	1	1	1	P00558		0	0.005	0.01119	1.35874	2	884.451	-0.61067	83.757	0
	High	YAEAVTR	1	1	1	P00558		0	0.006	0.01312	1.74549	2	809.415	0.135285	35.9643	0
	High	LGDVYVNDAFGTAHR	1	1	1	P00558		0	0.006	0.01192	1.36824	3	1634.79	-0.0384696	97.9781	0
P80723	Brain acid soluble protein 1 OS=Homo sapiens GN=BASP1 PE=1 SV=2 - [BASP1_HUMAN]	0	19.82	1	2	2	2	227	22.68	4.62744
	A2	Sequence	# PSMs	# Proteins	# Protein Groups	Protein Group Accessions	Modifications	ΔCn	q-Value	PEP	XCorr	Charge	MH+ [Da]	ΔM [ppm]	RT [min]	# Missed Cleavages
	High	AEPPKAPEQEQAAPGPAAGGEAPK	1	1	1	P80723		0	0.005	0.008738	1.68196	3	2298.14	0.95275	53.1816	1
	High	SDGAPASDSKPGSSEAAPSSK	1	1	1	P80723		0	0.006	0.0531	1.40916	3	1932.88	-0.1332	29.3239	0

## Sheet: Protein Set A
Accession
P07437
P08238
P35908
P04075
P67936
Q14315
P13667
P26038
P60174
P23284
P67809
O60664
Q14764
P02533
P63104
O43707
P27797
P06576
P09493
Q13085
Q05682
P61981
P34931
P15121
P30101
Q9Y490
O75369
O43175
P13639
O00469
P23396
P18669
Q7KZF4
O15460
P07195
P62937
Q14103
P35613
P62258
P46821
Q9H0U4
P18206
P13489
Q86YZ3
Q13765
P06748
P13647
P51149
P27348
P09936
Q16555
P08758
P26641
Q92597
P40925
Q16658
Q15293
P34932
Q8IZP2
P60842
P61204
Q9UQ80
P13674
P15531
P01891
P05023
Q99729
P11940
P19338
Q92945
P16070
P36957
P31943
P09382
P05556
P07858
P46777
Q15942
P84098
P29692
O75396
Q01844
P62249
P39019
P52907
P50990
P62263
P23588
P63244
P55884
Q14697
P22314
Q09666
P23246
P31949
O43399
P11586
P61978
P29401
O00299
Q12906
P46781
O75083
Q96HE7
P06744
Q00839
Q08211
P49755
P53396
Q04446
P47756
P62753
P29966
P23526
P36871
P52272
P25705
P05198
Q14847
P55072
P26599
Q9H299
P14314
P06396
Q99497
